# Supplementary material for: Three-component synthesis of fluorinated pyrazoles from fluoroalkylamines, NaNO2 and electron-deficient alkynes
Source: Royal Society of Chemistry journal article supplement (doi:10.1039/c4ob02670e), 2015-01-01

Supporting Information

Copies of NMR spectra.

Compound 2a

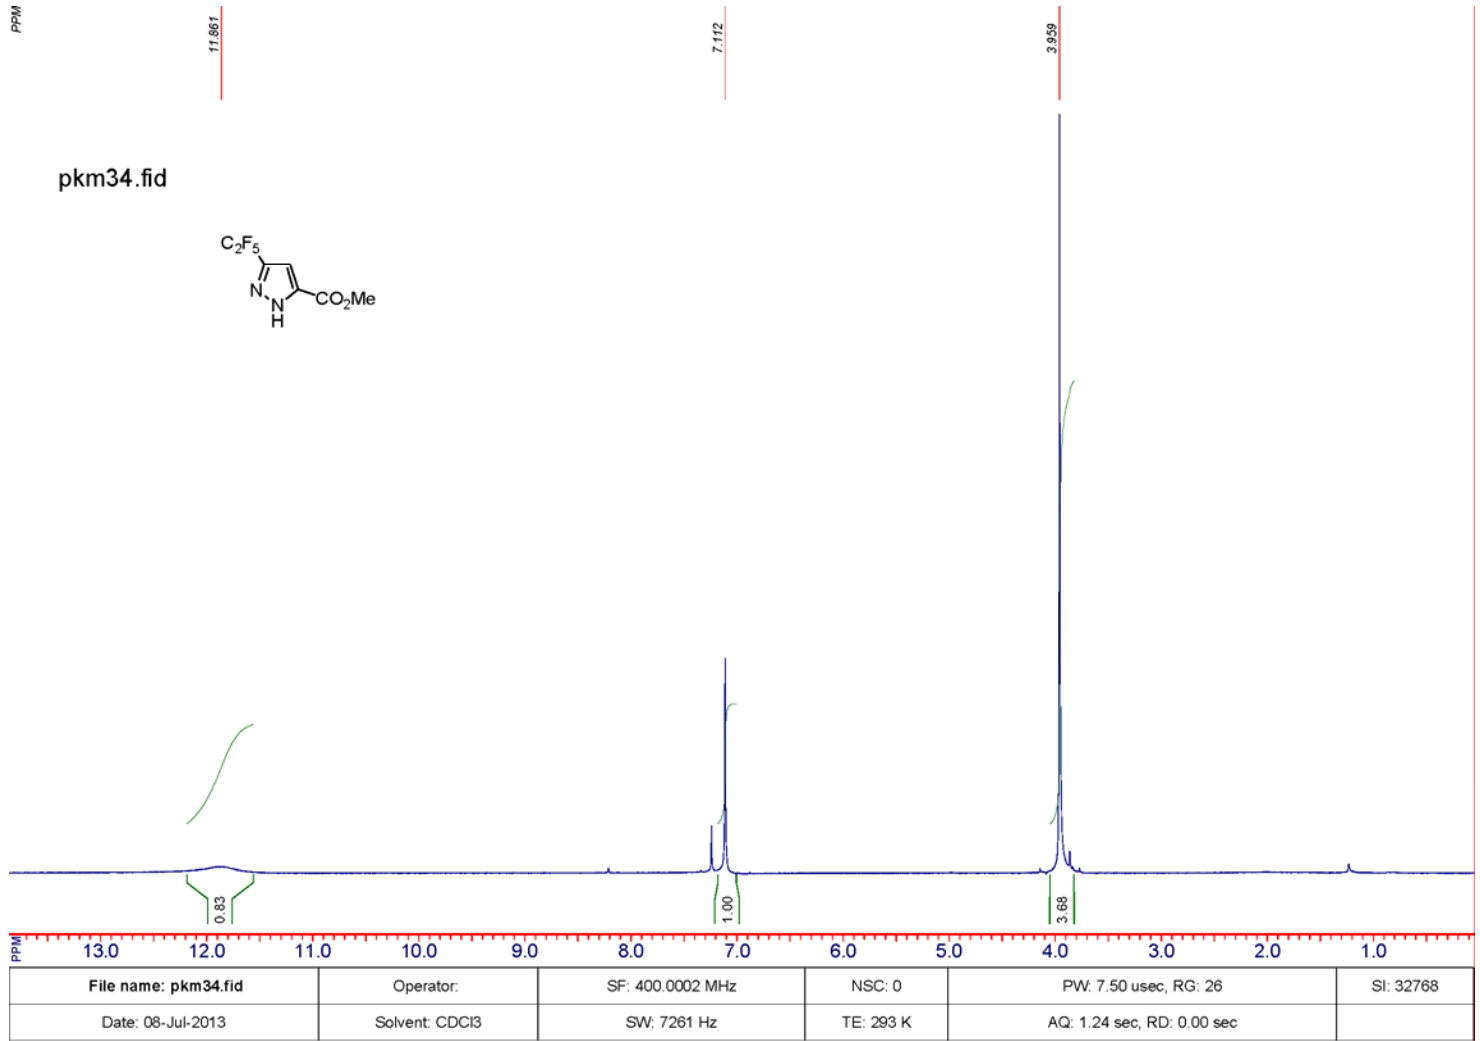

PPM

pkm34\_C13

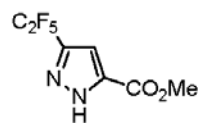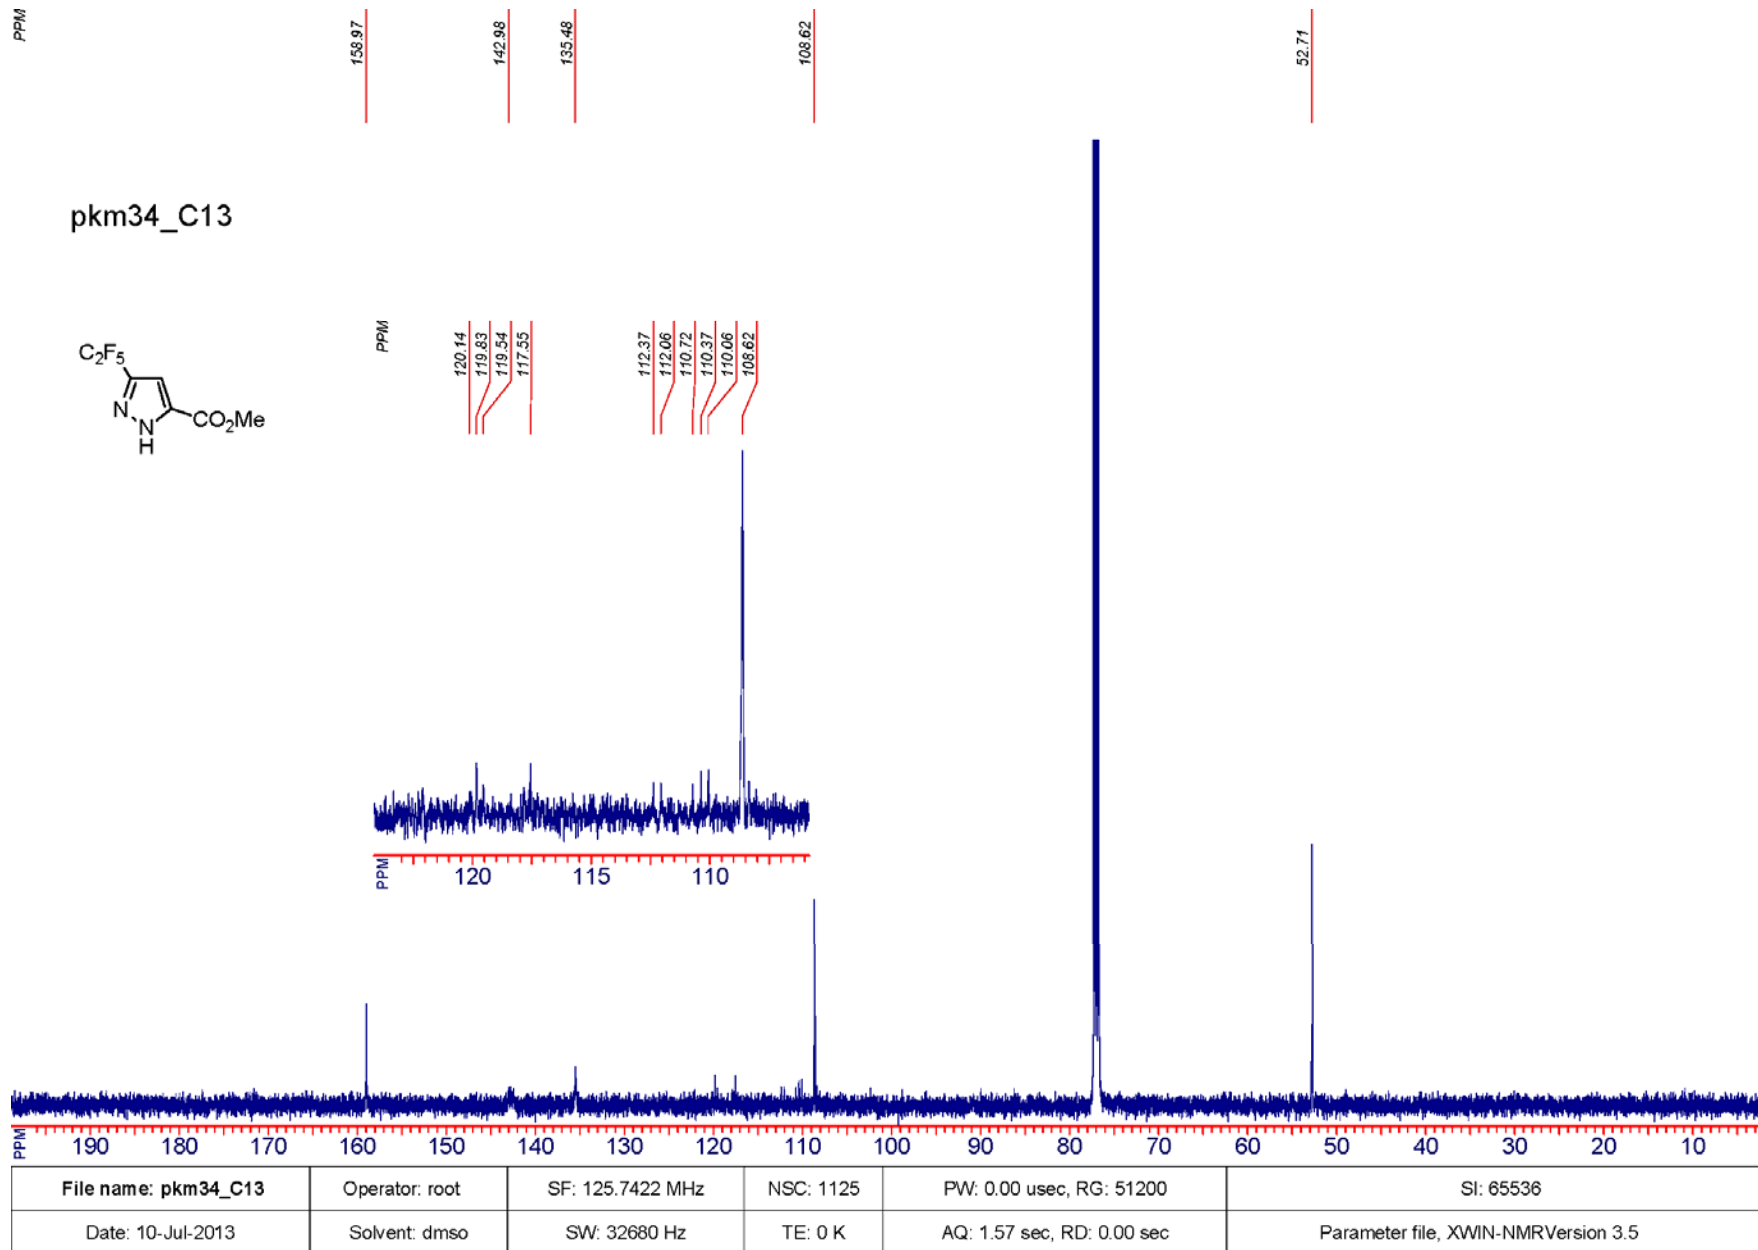

PPM

pkm34\_F19.fid

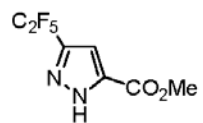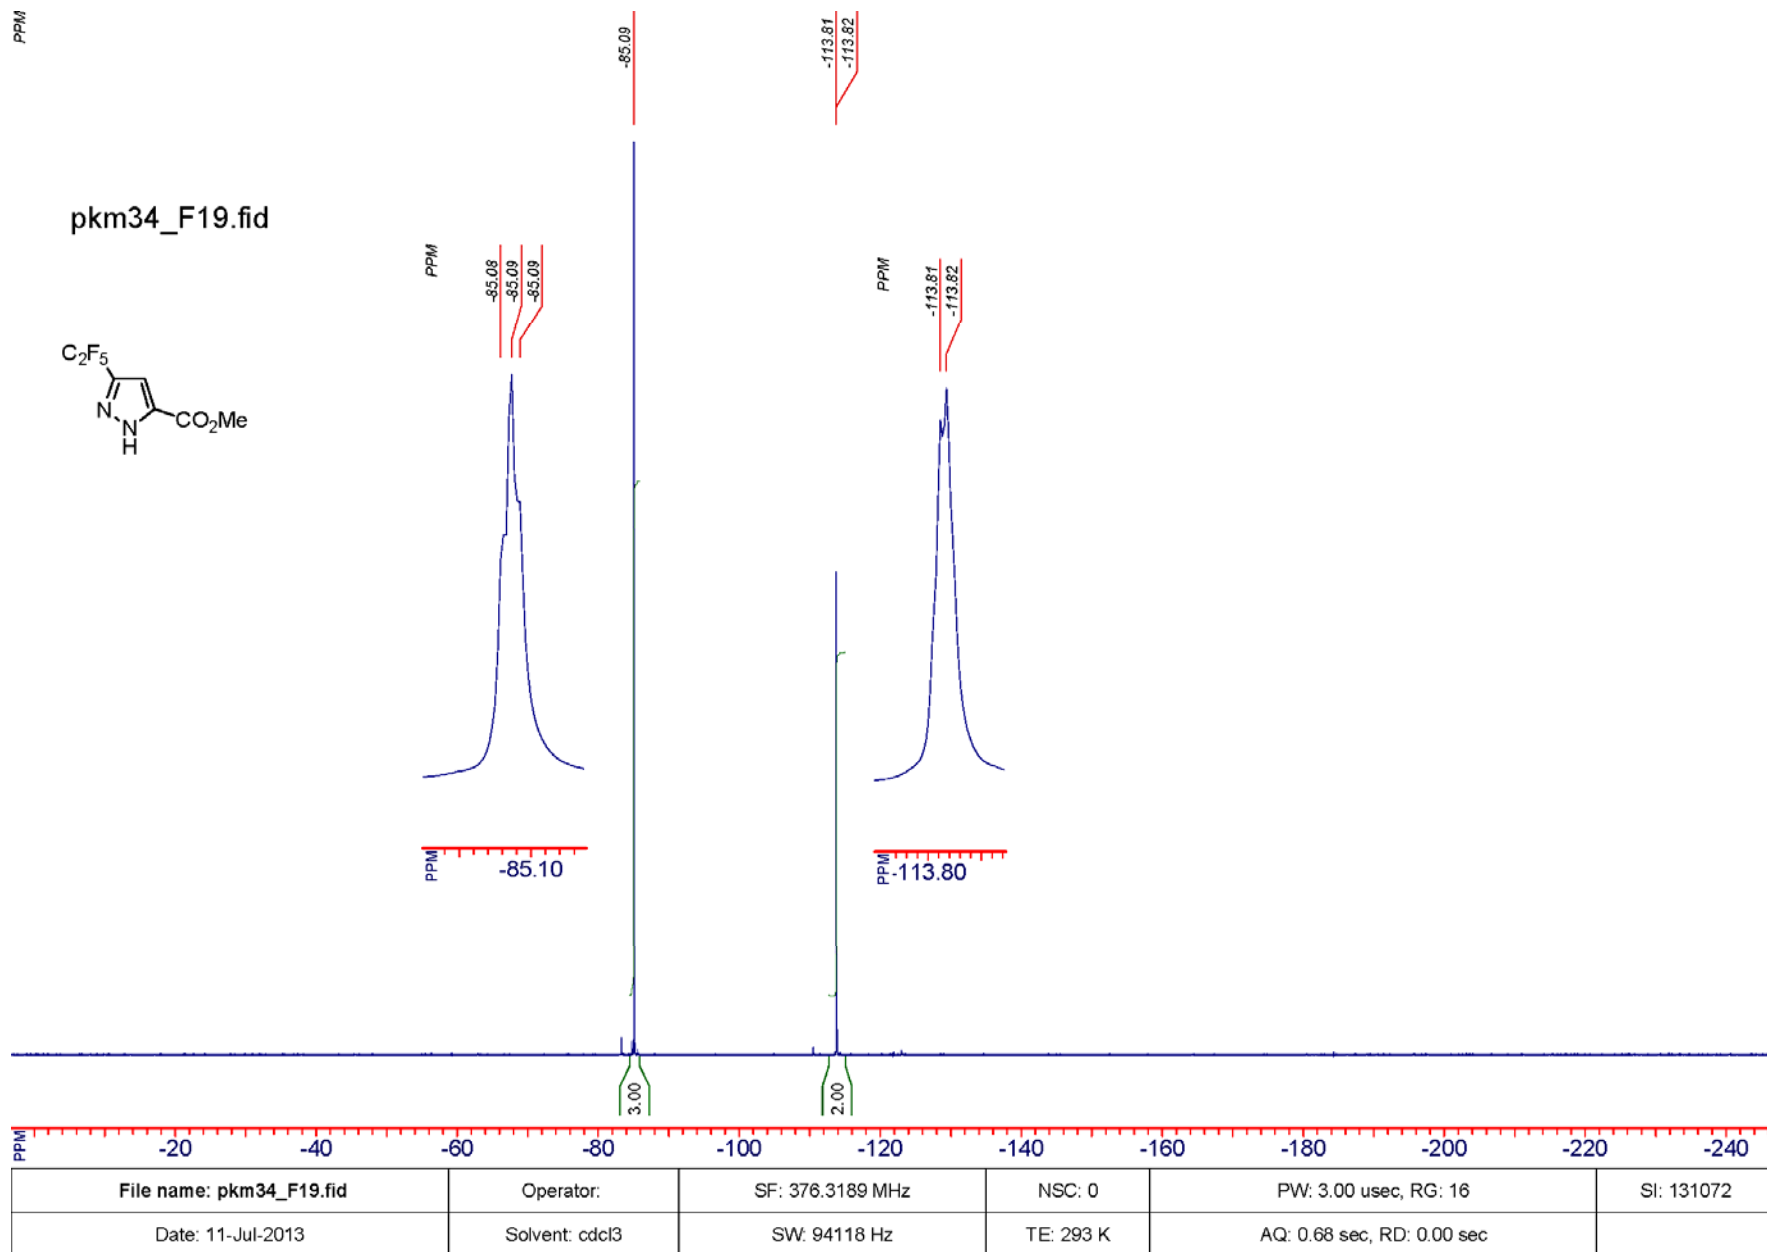

# Compound 3a

PPM

7.197

3.862

pkm318

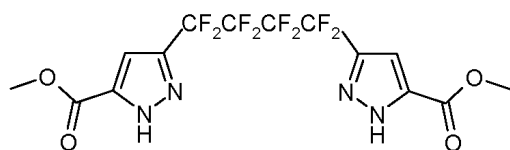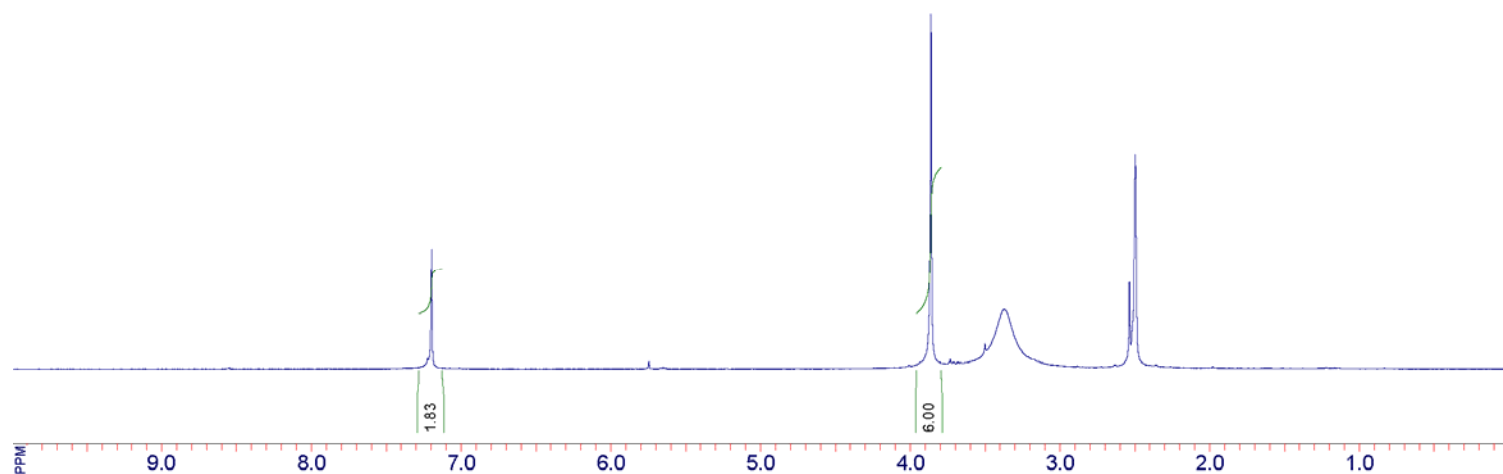

|                   |                |                  |         |                            |                                      |
|-------------------|----------------|------------------|---------|----------------------------|--------------------------------------|
| File name: pkm318 | Operator: root | SF: 499.9500 MHz | NSC: 1  | PW: 0.00 usec, RG: 24      | SI: 32768                            |
| Date: 29-Sep-2014 | Solvent: DMSO  | SW: 8993 Hz      | TE: 0 K | AQ: 1.82 sec, RD: 0.00 sec | Parameter file, XWIN-NMR Version 3.5 |

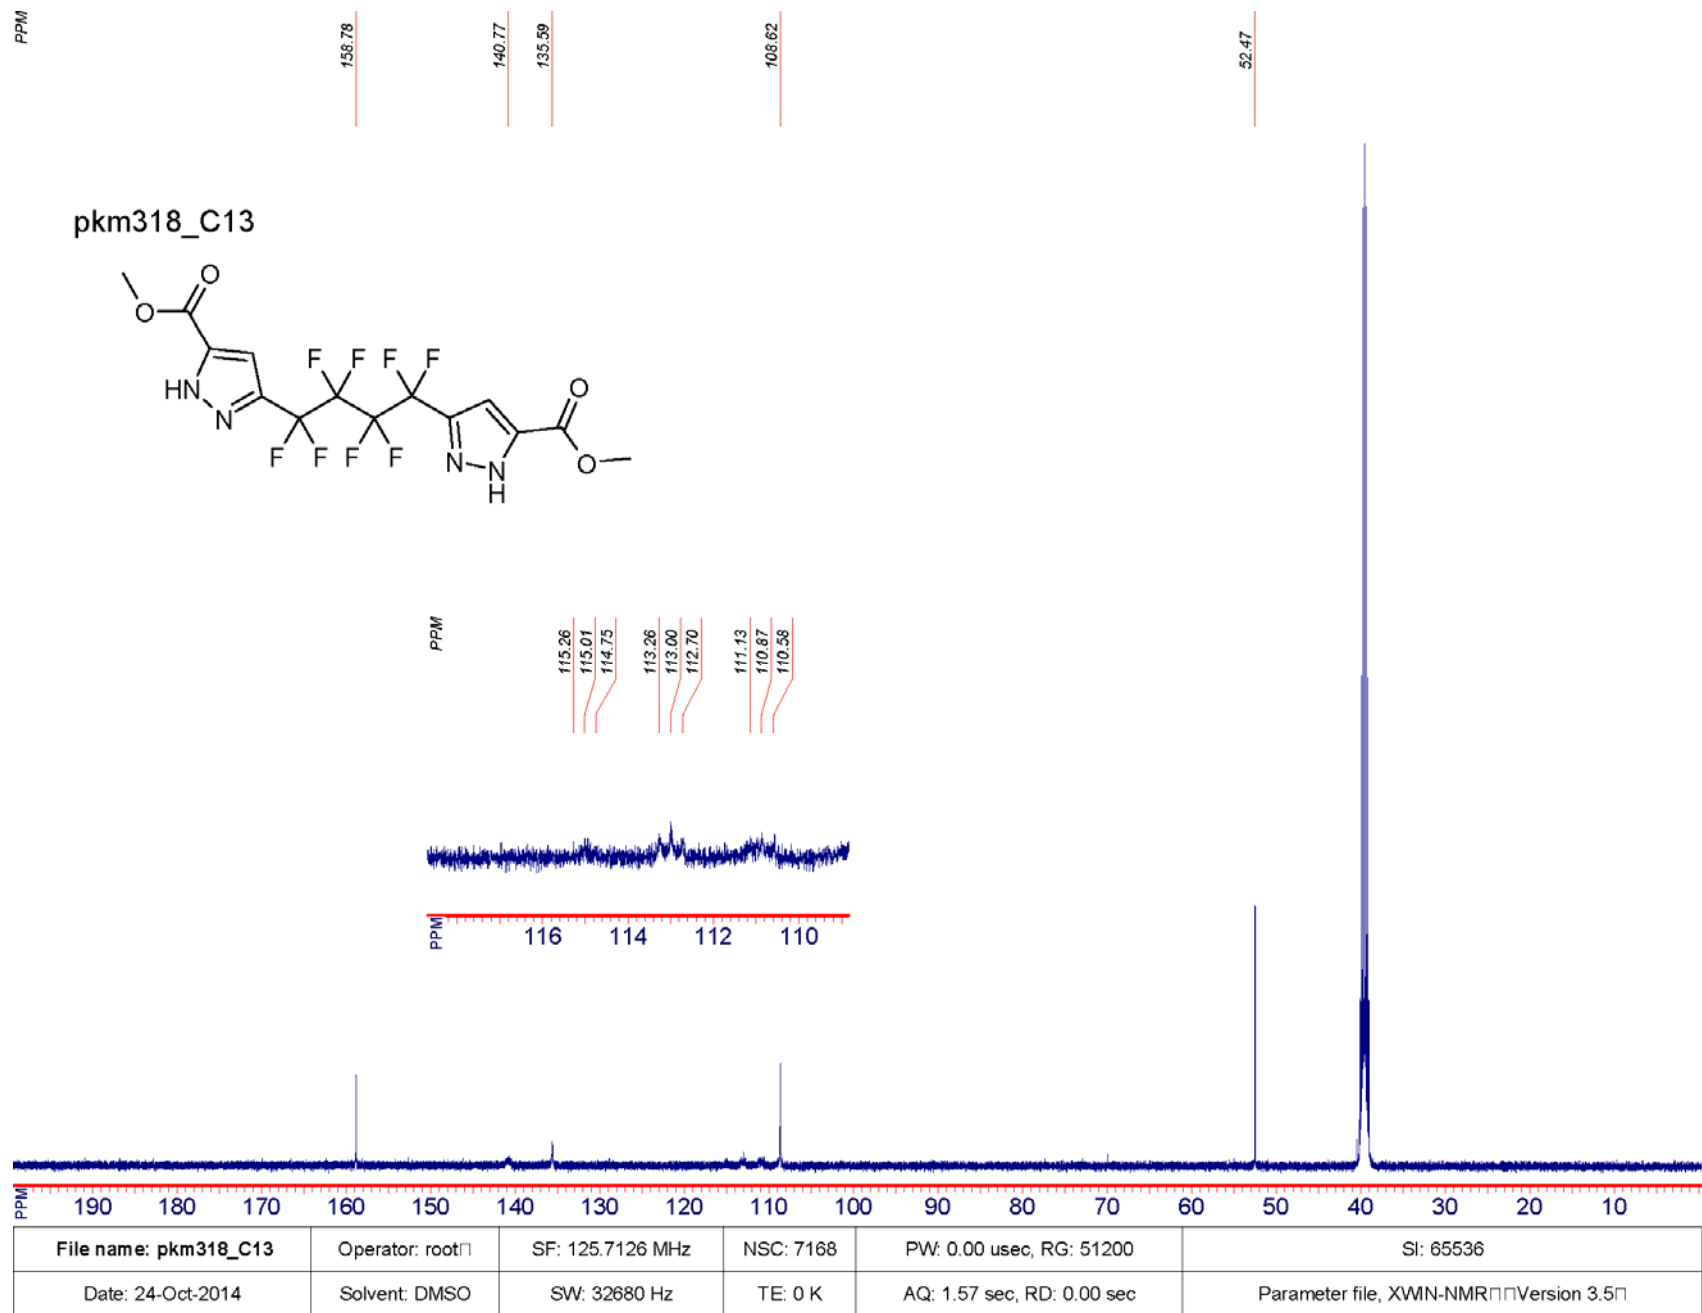

pkm318\_F19.fid

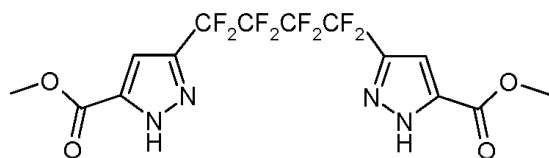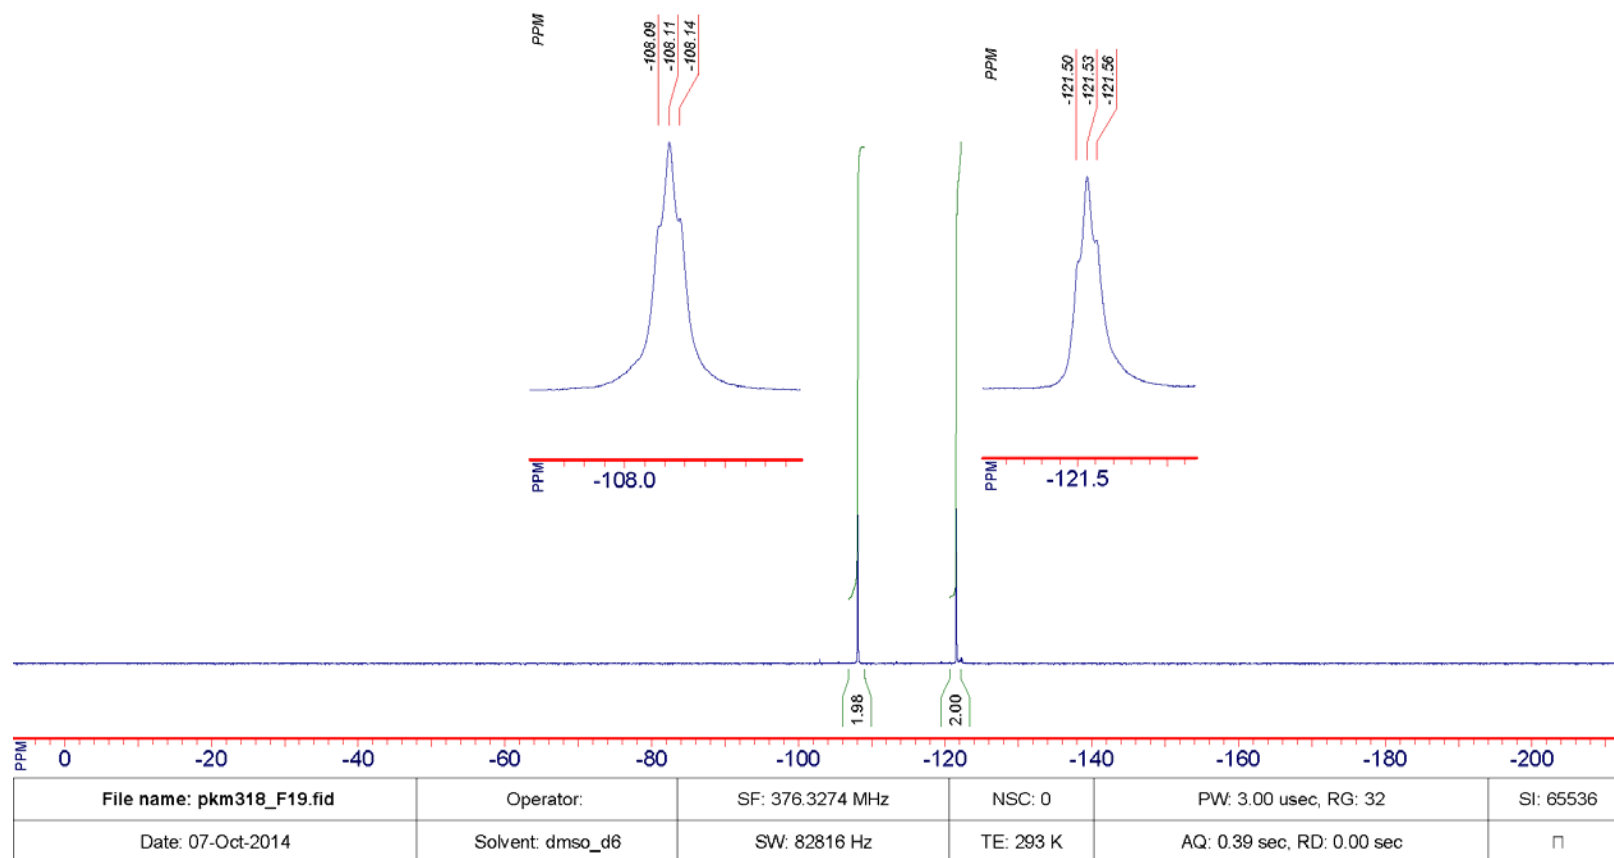

# Compound 4a

PPM

7.117

6.237

6.130

6.027

3.969

pkm239

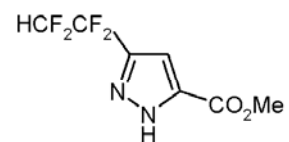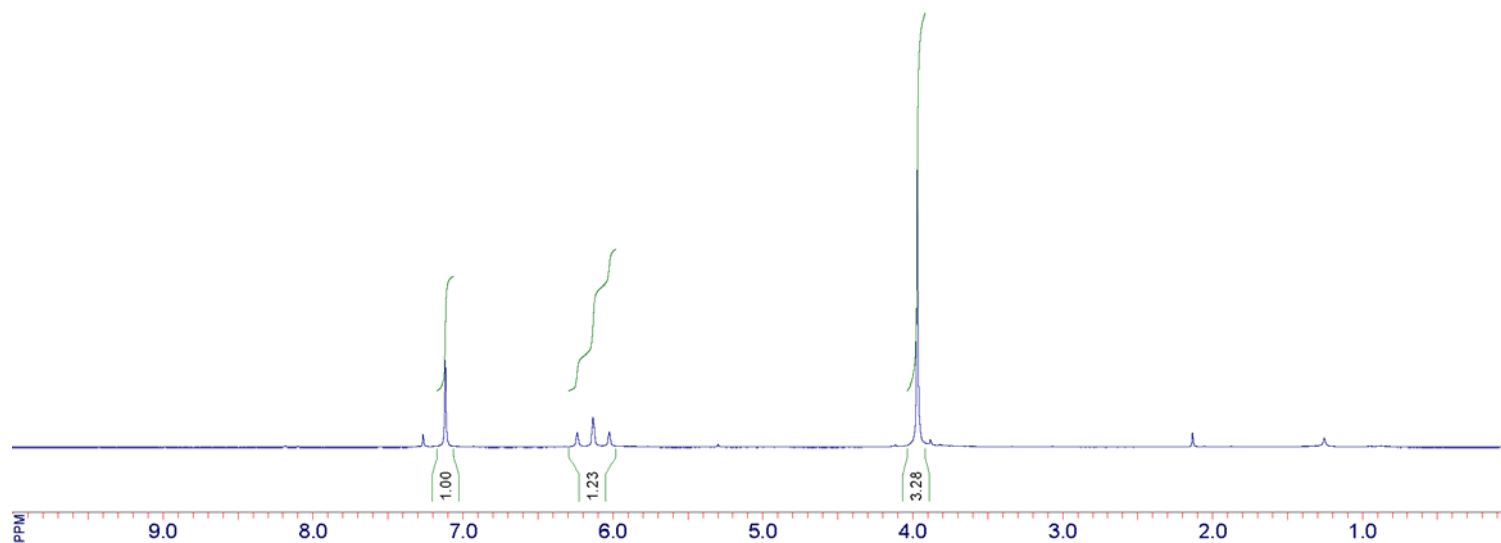

|                   |                            |                  |         |                            |                                      |
|-------------------|----------------------------|------------------|---------|----------------------------|--------------------------------------|
| File name: pkm239 | Operator: root             | SF: 499.9500 MHz | NSC: 1  | PW: 0.00 usec, RG: 32      | SI: 32768                            |
| Date: 17-Jul-2014 | Solvent: CDCl <sub>3</sub> | SW: 8993 Hz      | TE: 0 K | AQ: 1.82 sec, RD: 0.00 sec | Parameter file, XWIN-NMR Version 3.5 |





pkm239\_F19.fid

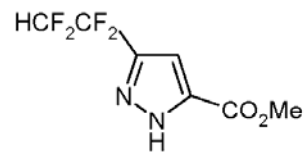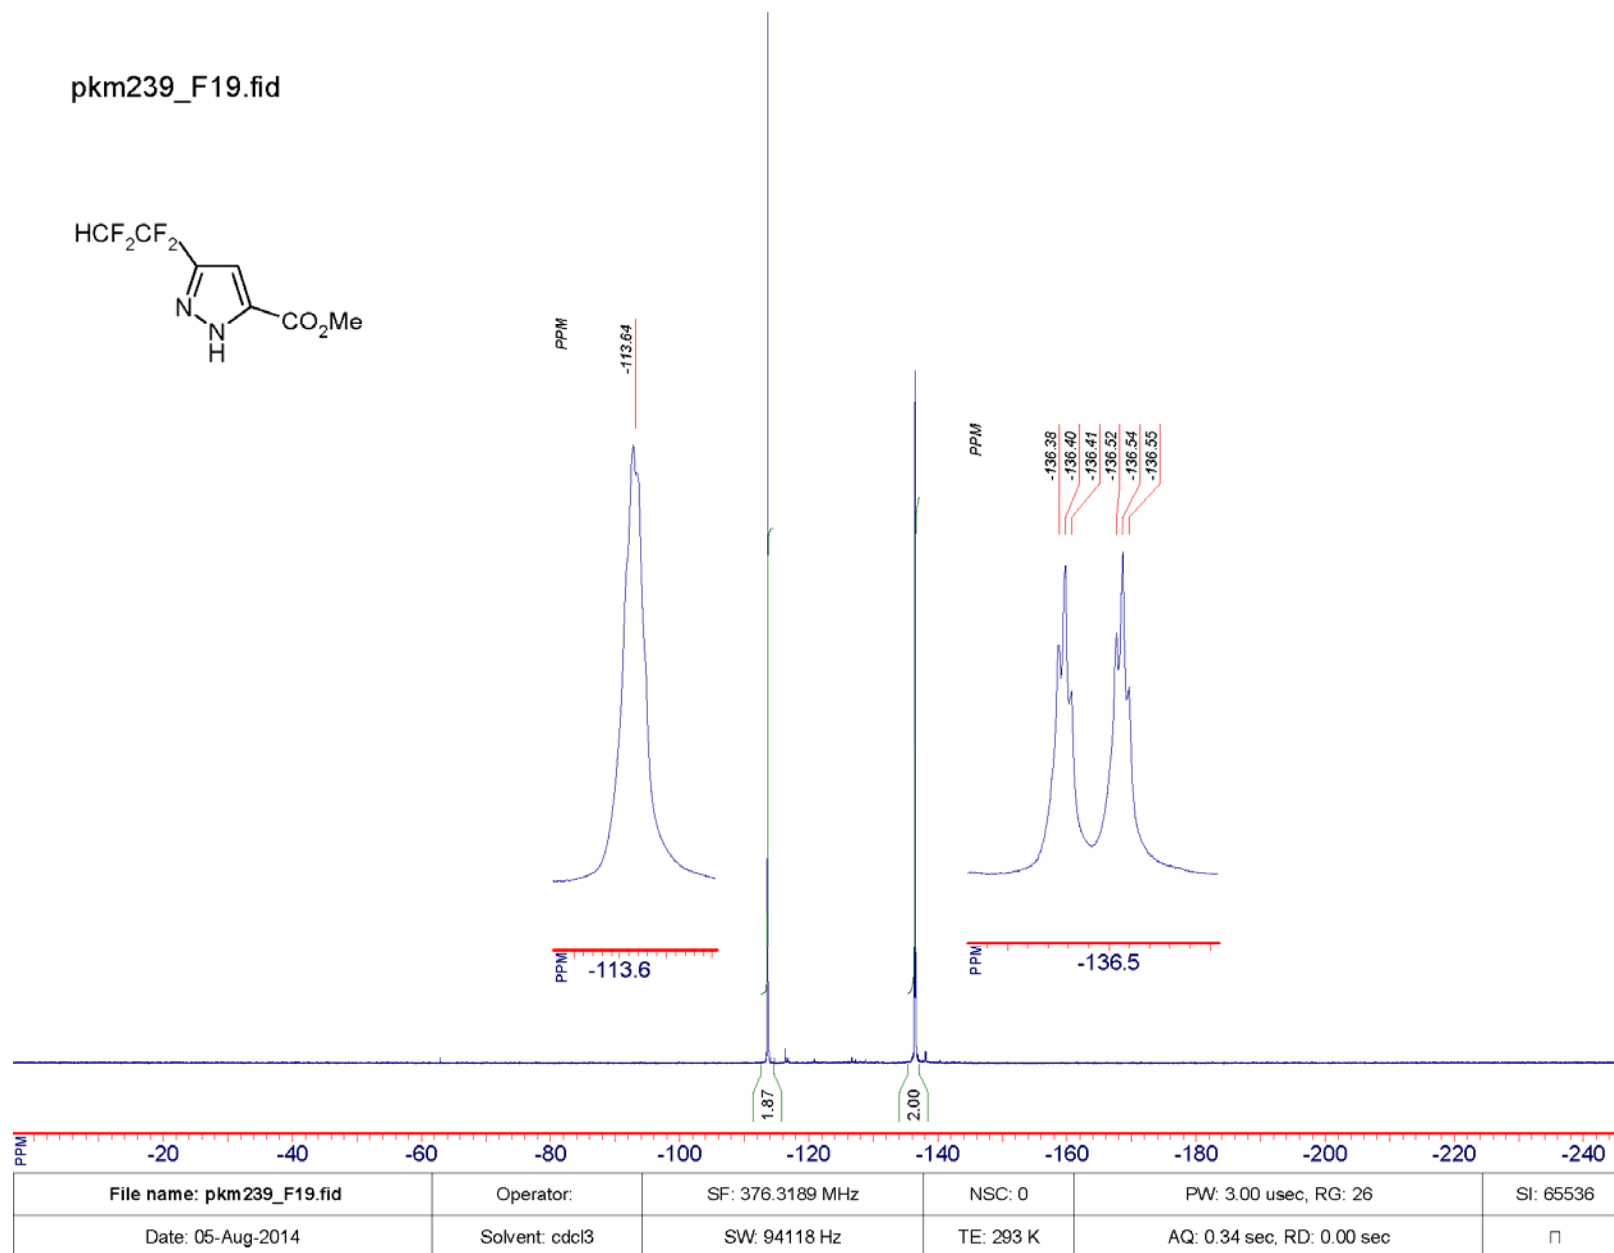

# Compound 5b

ppm

pdm125

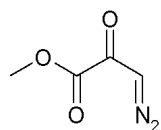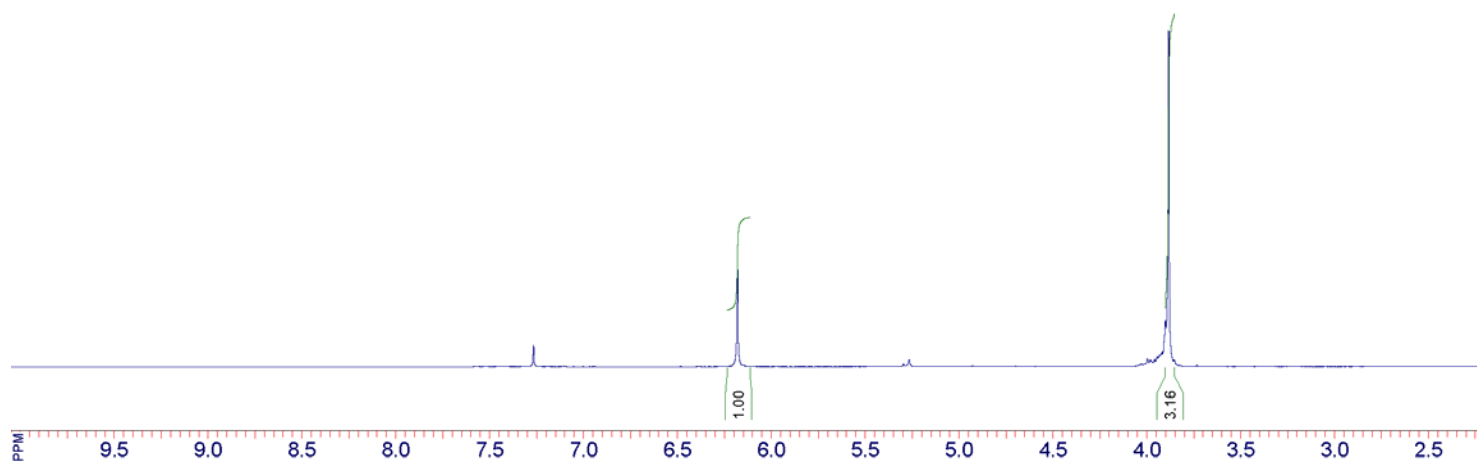

|                   |                |                  |         |                            |                                      |
|-------------------|----------------|------------------|---------|----------------------------|--------------------------------------|
| File name: pdm125 | Operator: root | SF: 499.9500 MHz | NSC: 1  | PW: 0.00 usec, RG: 64      | SI: 32768                            |
| Date: 13-Dec-2013 | Solvent: CDCl3 | SW: 8993 Hz      | TE: 0 K | AQ: 1.82 sec, RD: 0.00 sec | Parameter file, XWIN-NMR Version 3.5 |

ppm

176.14

160.44

56.73

53.03

pkm125\_C13

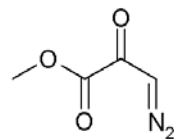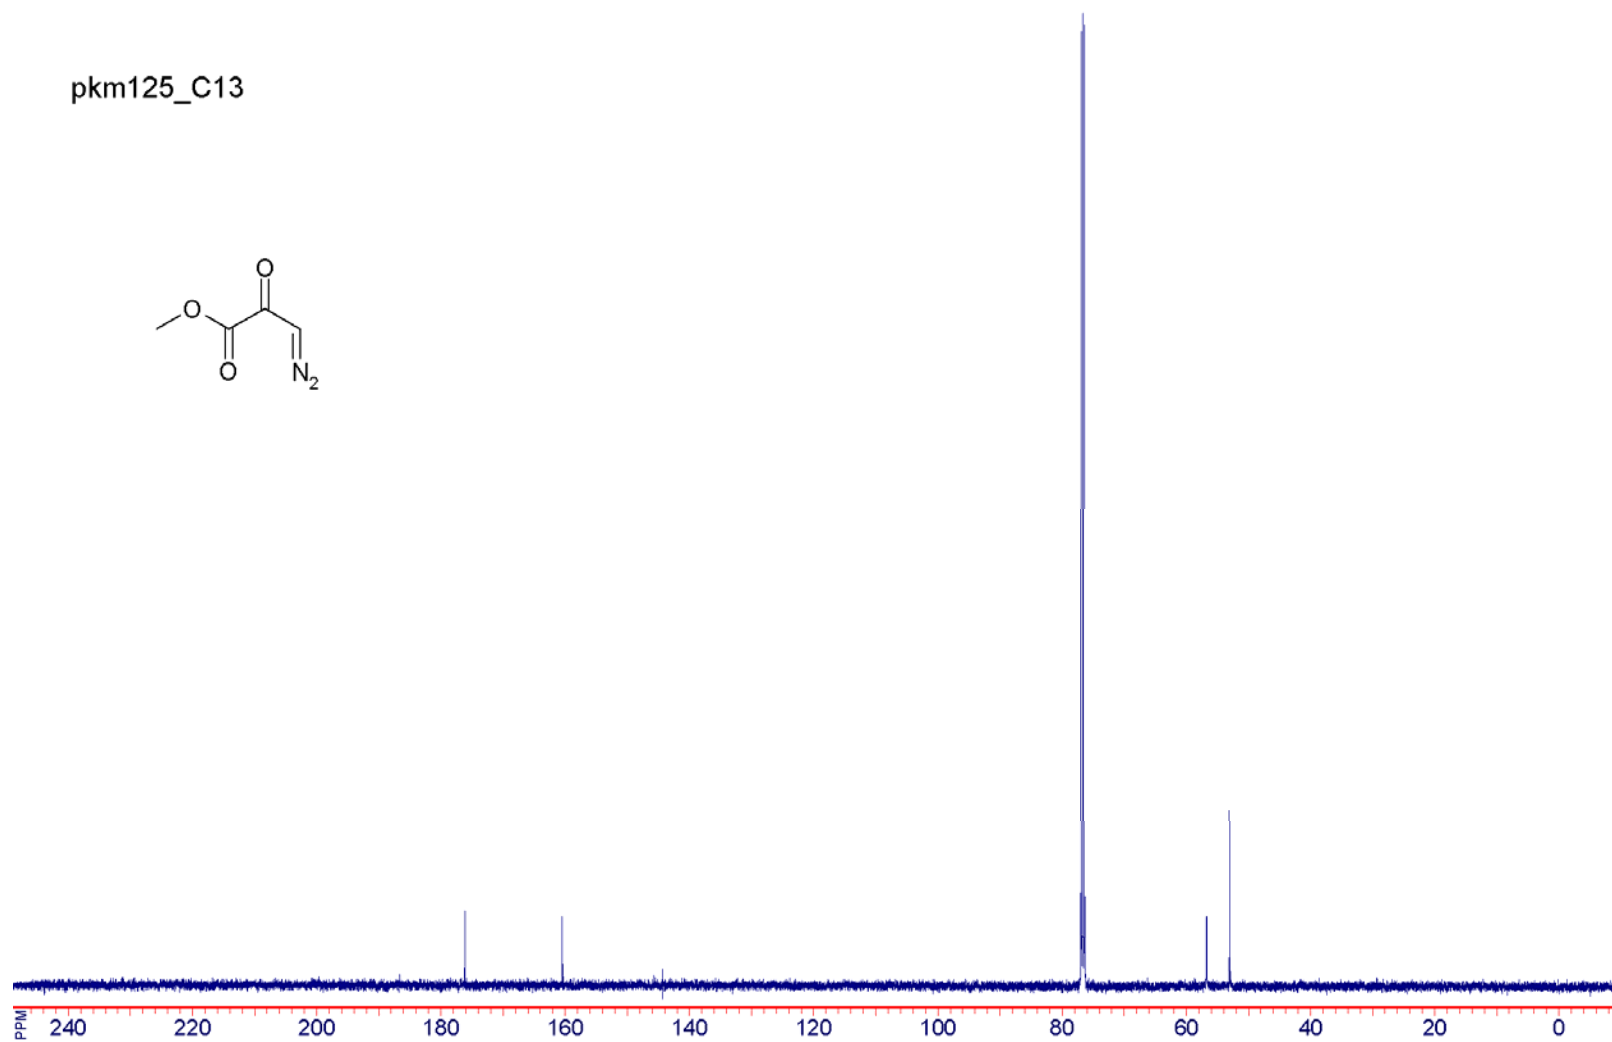

|                       |               |                  |          |                            |                                      |
|-----------------------|---------------|------------------|----------|----------------------------|--------------------------------------|
| File name: pkm125_C13 | Operator: psm | SF: 125.7126 MHz | NSC: 687 | PW: 0.00 usec, RG: 51200   | SI: 65536                            |
| Date: 14-Dec-2013     | Solvent: dms0 | SW: 32680 Hz     | TE: 0 K  | AQ: 1.57 sec, RD: 0.00 sec | Parameter file, XWIN-NMR Version 3.5 |

**Compound 6b** (ca. 90% purity)

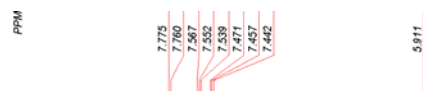

pkm379

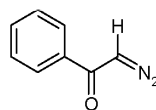

ca. 80% purity

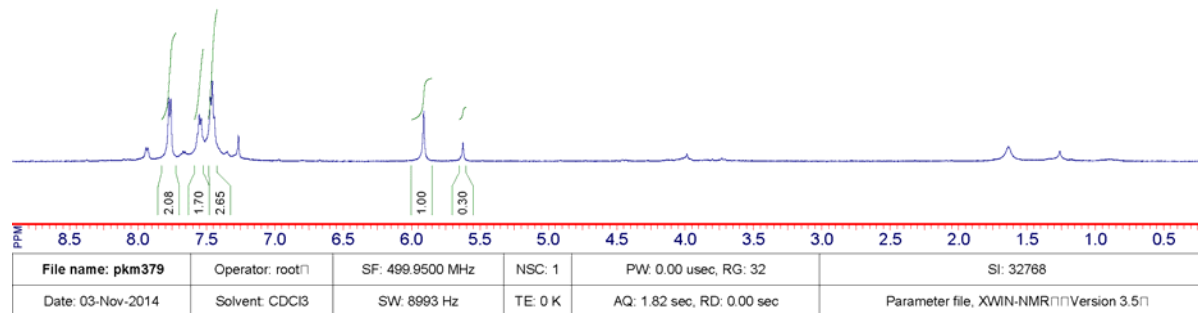

Copy of NMR of pure **6b** from Literature data.<sup>1</sup>

<sup>1</sup>H NMR 2-Diazoacetophenone (300 MHz, CDCl<sub>3</sub>)

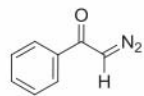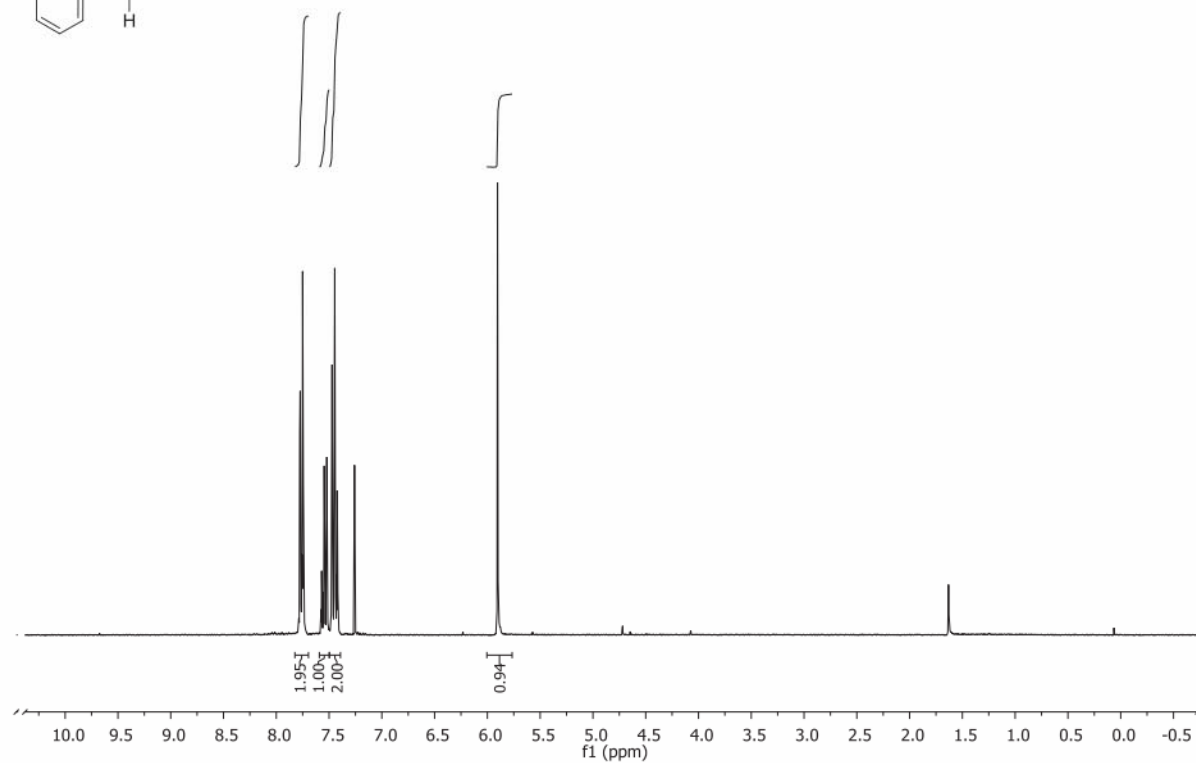

S9

<sup>1</sup> S. P. Bew, P.-A. Ashford, D. U. Bachera *Synthesis* **2013**, 45, 903.

# Compound 6c

PPM

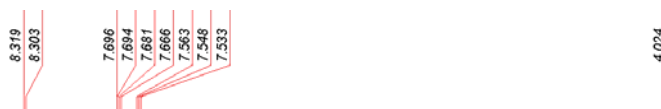

pkm393

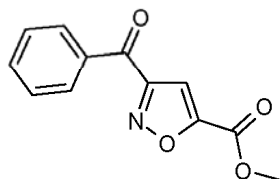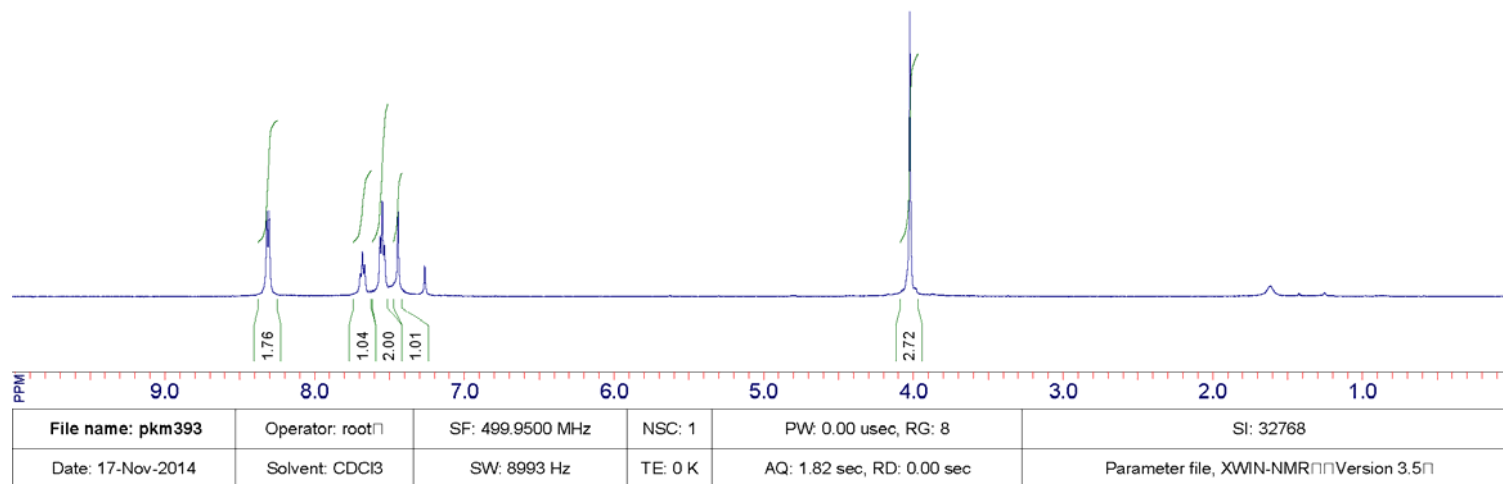

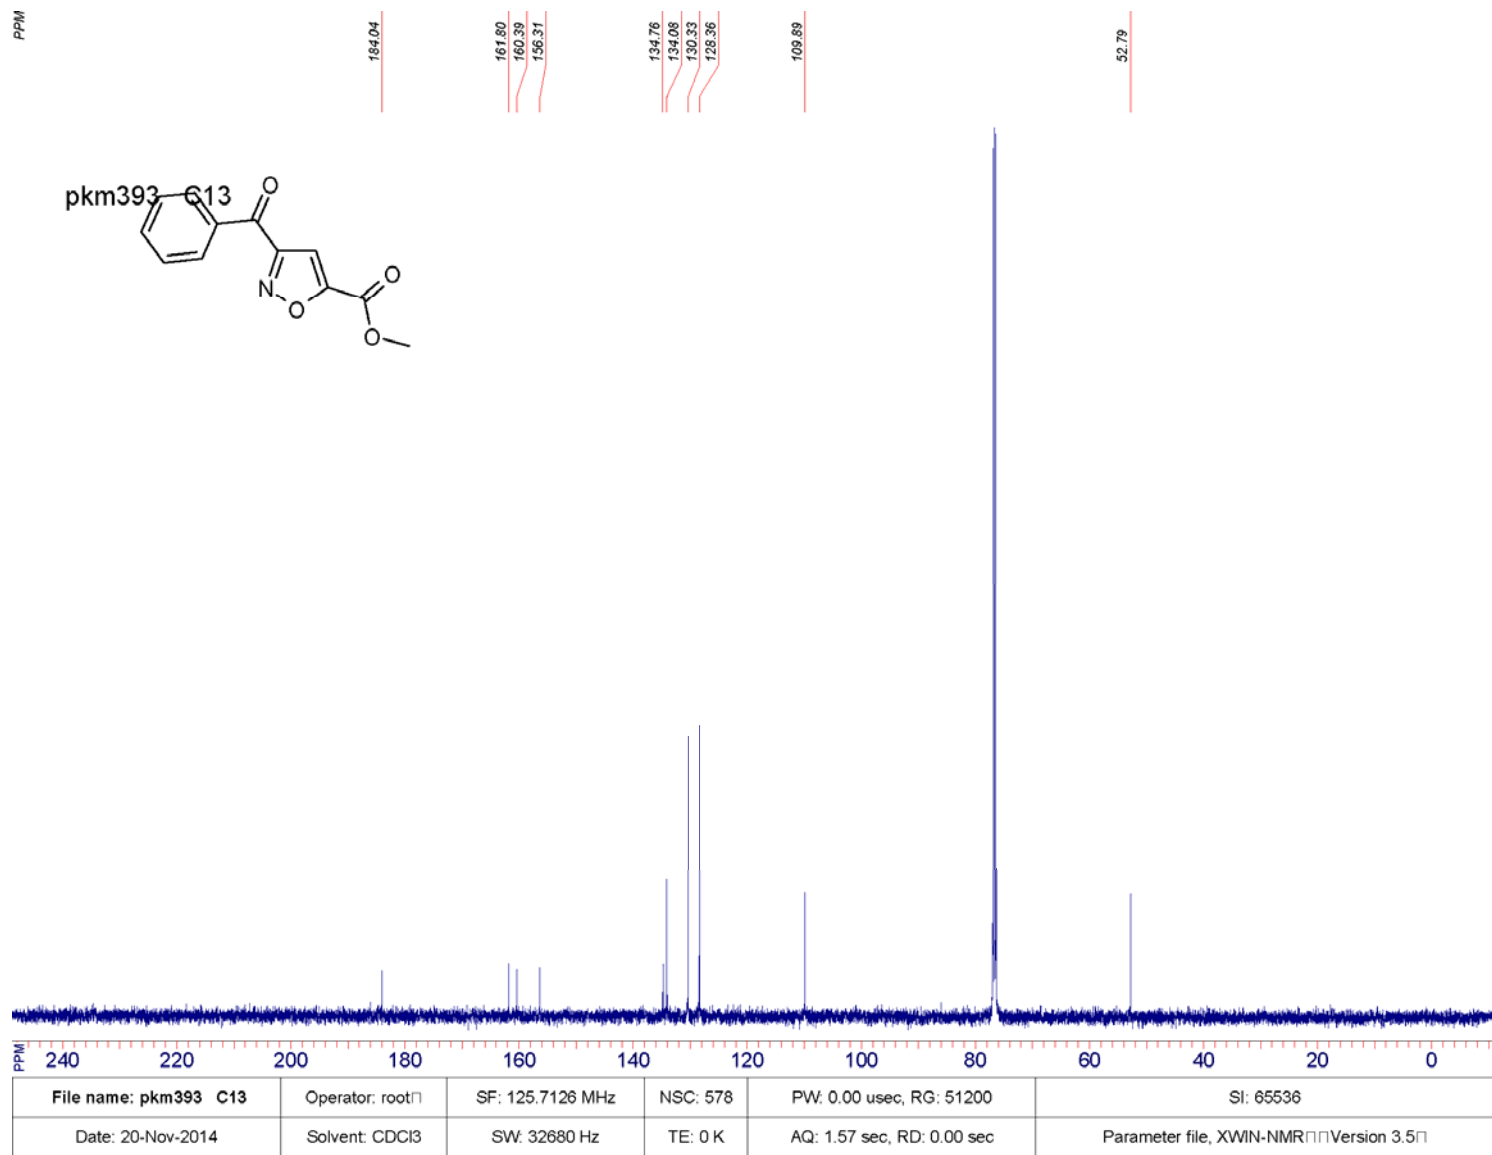

Reaction mixture containing **7b** (signals are marked in yellow):<sup>2</sup>

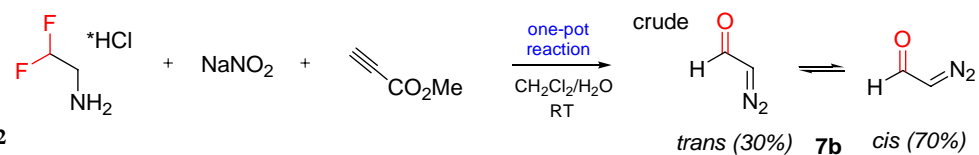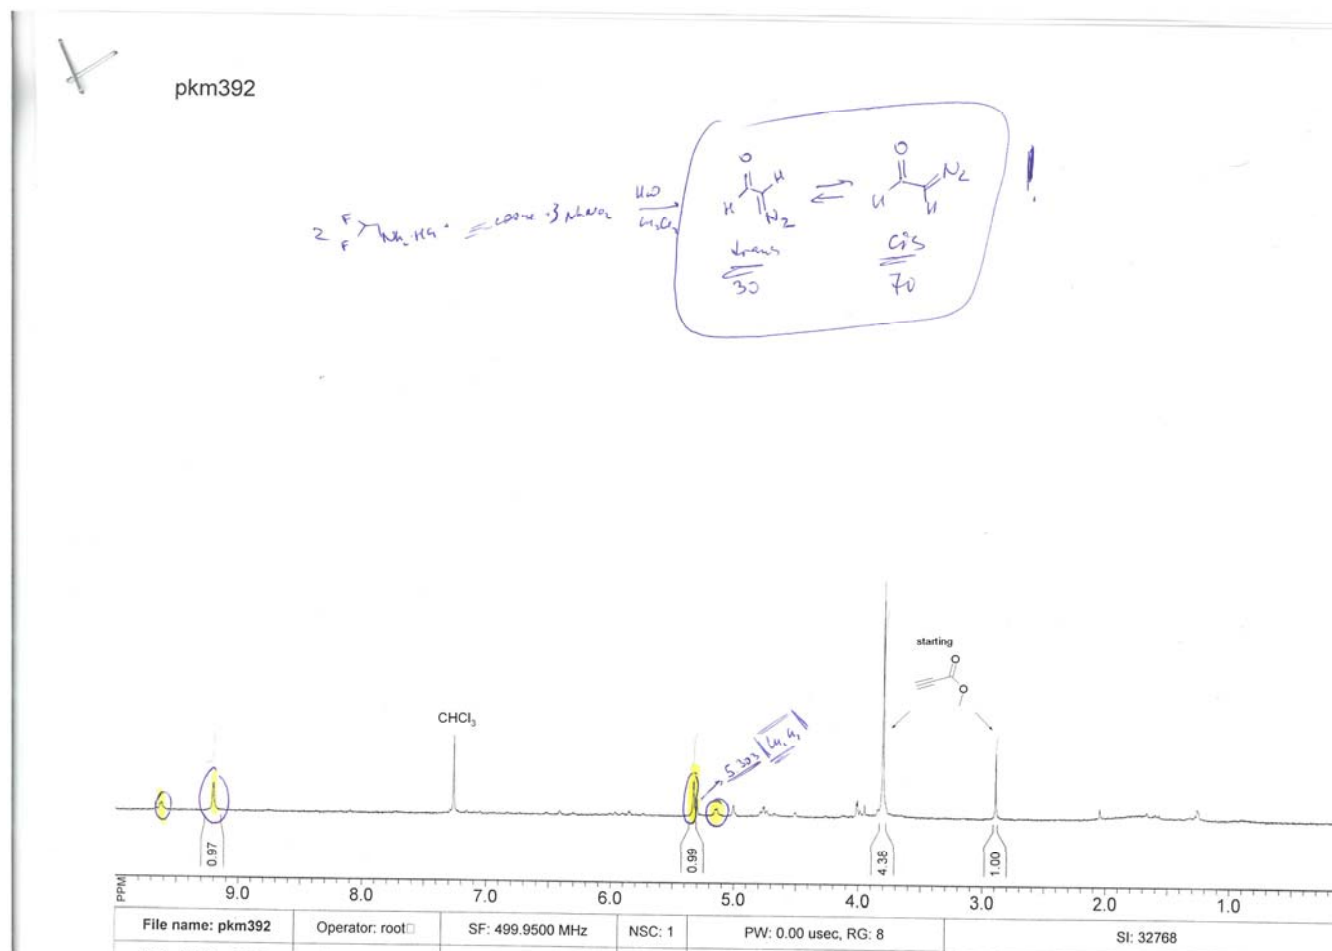

<sup>2</sup> Pure diazoacetaldehyde **7b** is described in: Y. Chiang, A. J. Kresge, V. V. Popik *J. Chem. Soc. Perkin Trans. 2*, **1999**, 1107. Citation from the manuscript:

“Proton NMR spectra of diazoacetaldehyde:  $\delta$ H (200 MHz; CDCl<sub>3</sub>; Me<sub>4</sub>Si) 9.61 (0.30 H, d, J = 6.8 Hz), 9.19 (0.67 H, s), 5.33 (0.74 H, s), 5.14 (0.29 H, d, J = 7.0 Hz); indicated restricted rotation about the C–C bond, giving rise to *s-cis* and *s-trans* isomers, present in the ratio 70 : 30 in CDCl<sub>3</sub>.”



# Compound 8c

PPM

7.579

5.501

4.767

3.922

pkm394

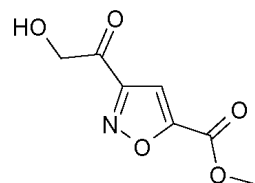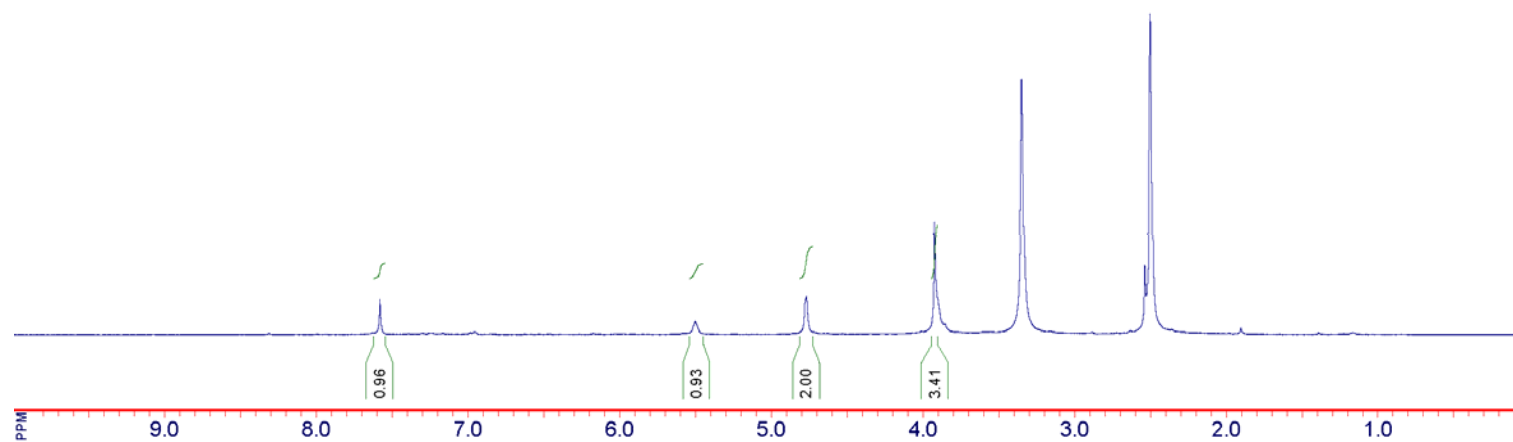

|                   |                  |                  |         |                            |                                      |
|-------------------|------------------|------------------|---------|----------------------------|--------------------------------------|
| File name: pkm394 | Operator: root   | SF: 499.9500 MHz | NSC: 1  | PW: 0.00 usec, RG: 101     | SI: 32768                            |
| Date: 17-Nov-2014 | Solvent: dmso_d6 | SW: 8993 Hz      | TE: 0 K | AQ: 1.82 sec, RD: 0.00 sec | Parameter file, XWIN-NMR Version 3.5 |

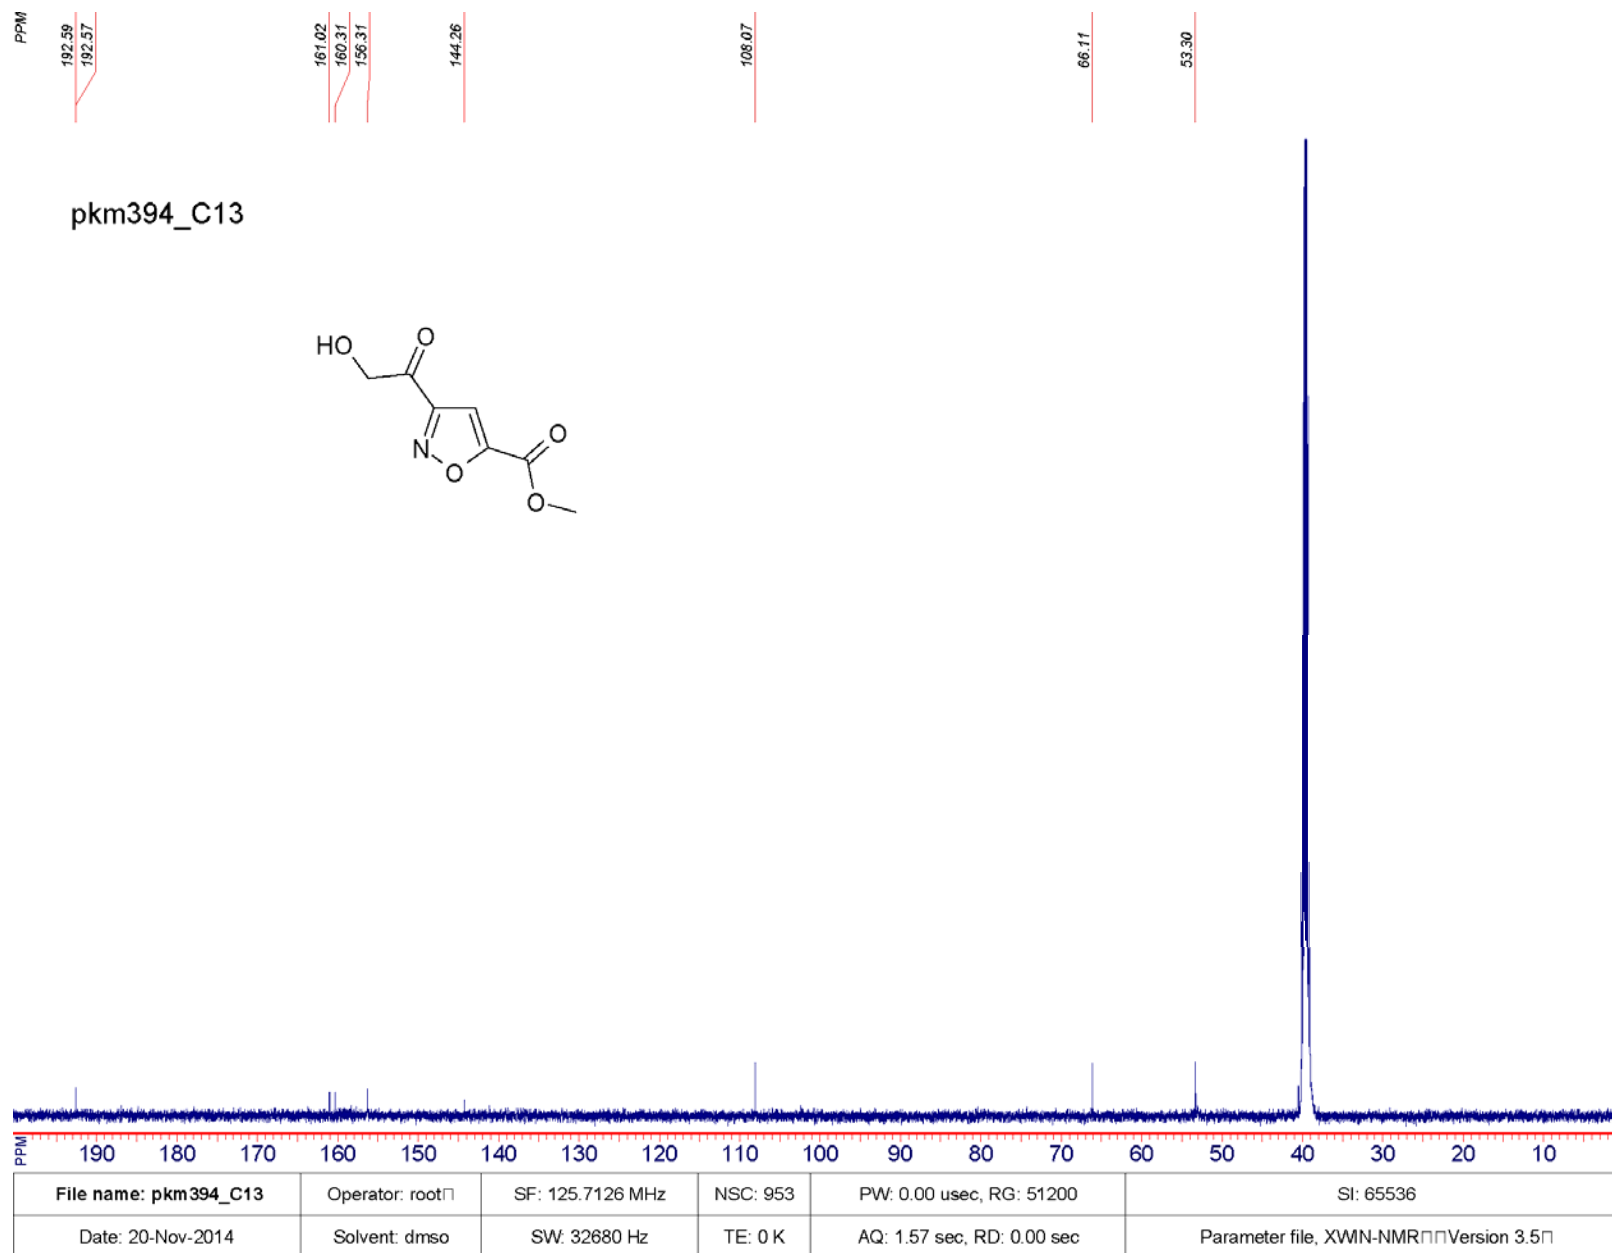

# Compound 9c

PPM

pkm370

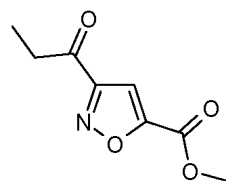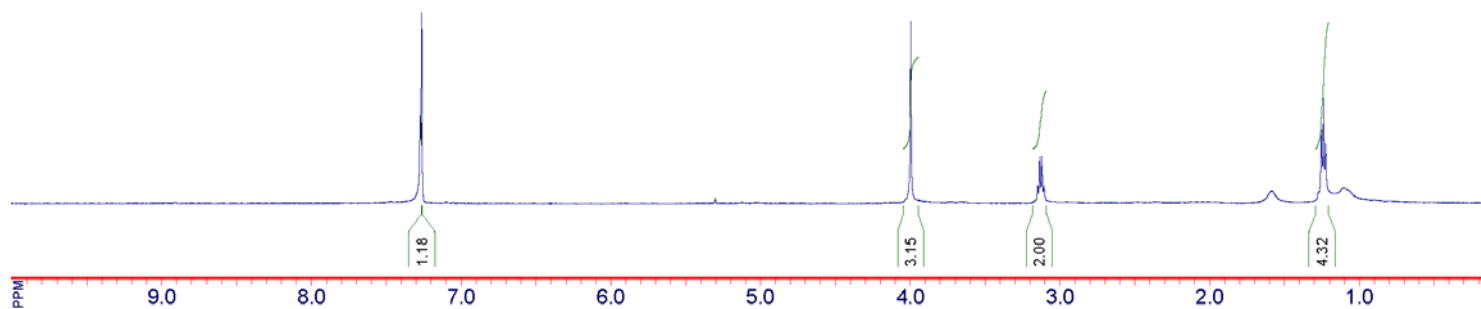

|                   |                |                  |         |                            |                                      |
|-------------------|----------------|------------------|---------|----------------------------|--------------------------------------|
| File name: pkm370 | Operator: root | SF: 499.9500 MHz | NSC: 1  | PW: 0.00 usec, RG: 24      | SI: 32768                            |
| Date: 27-Oct-2014 | Solvent: cdcl3 | SW: 8993 Hz      | TE: 0 K | AQ: 1.82 sec, RD: 0.00 sec | Parameter file, XWIN-NMR Version 3.5 |

ppm

pkm370\_C13

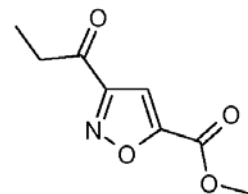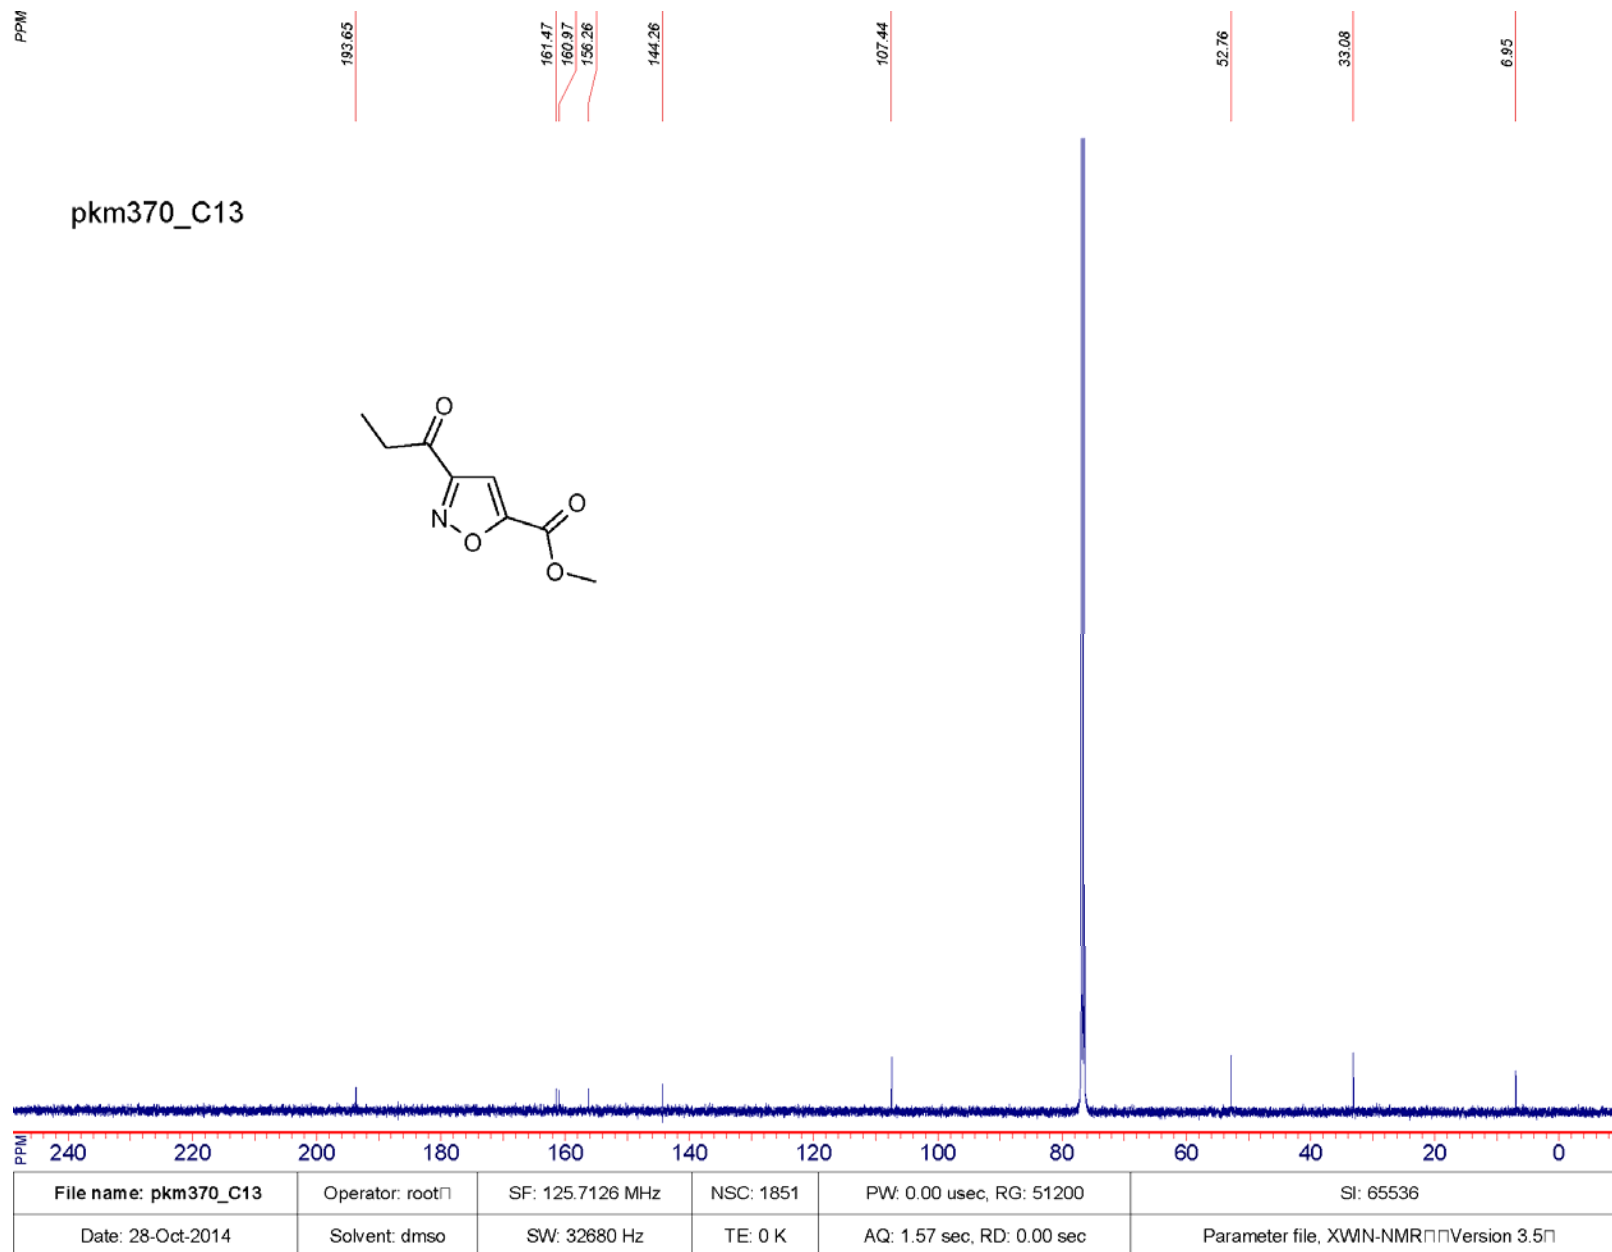

# Compound 9d

PPM

pkm322

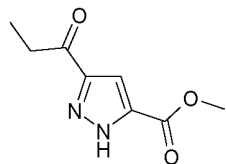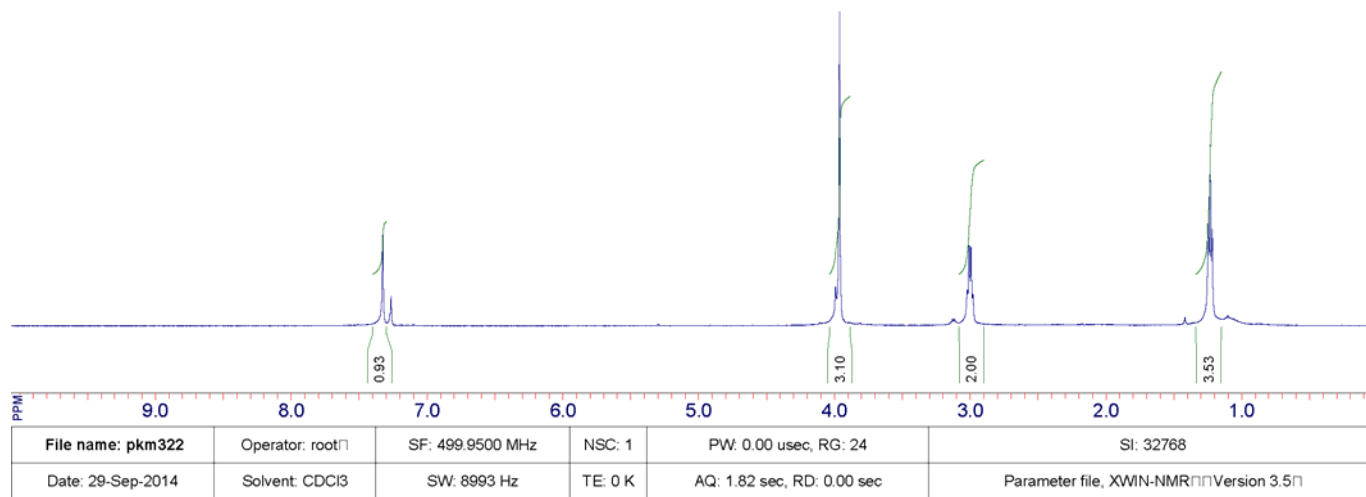

PPM

pkm322 C13

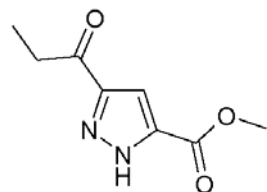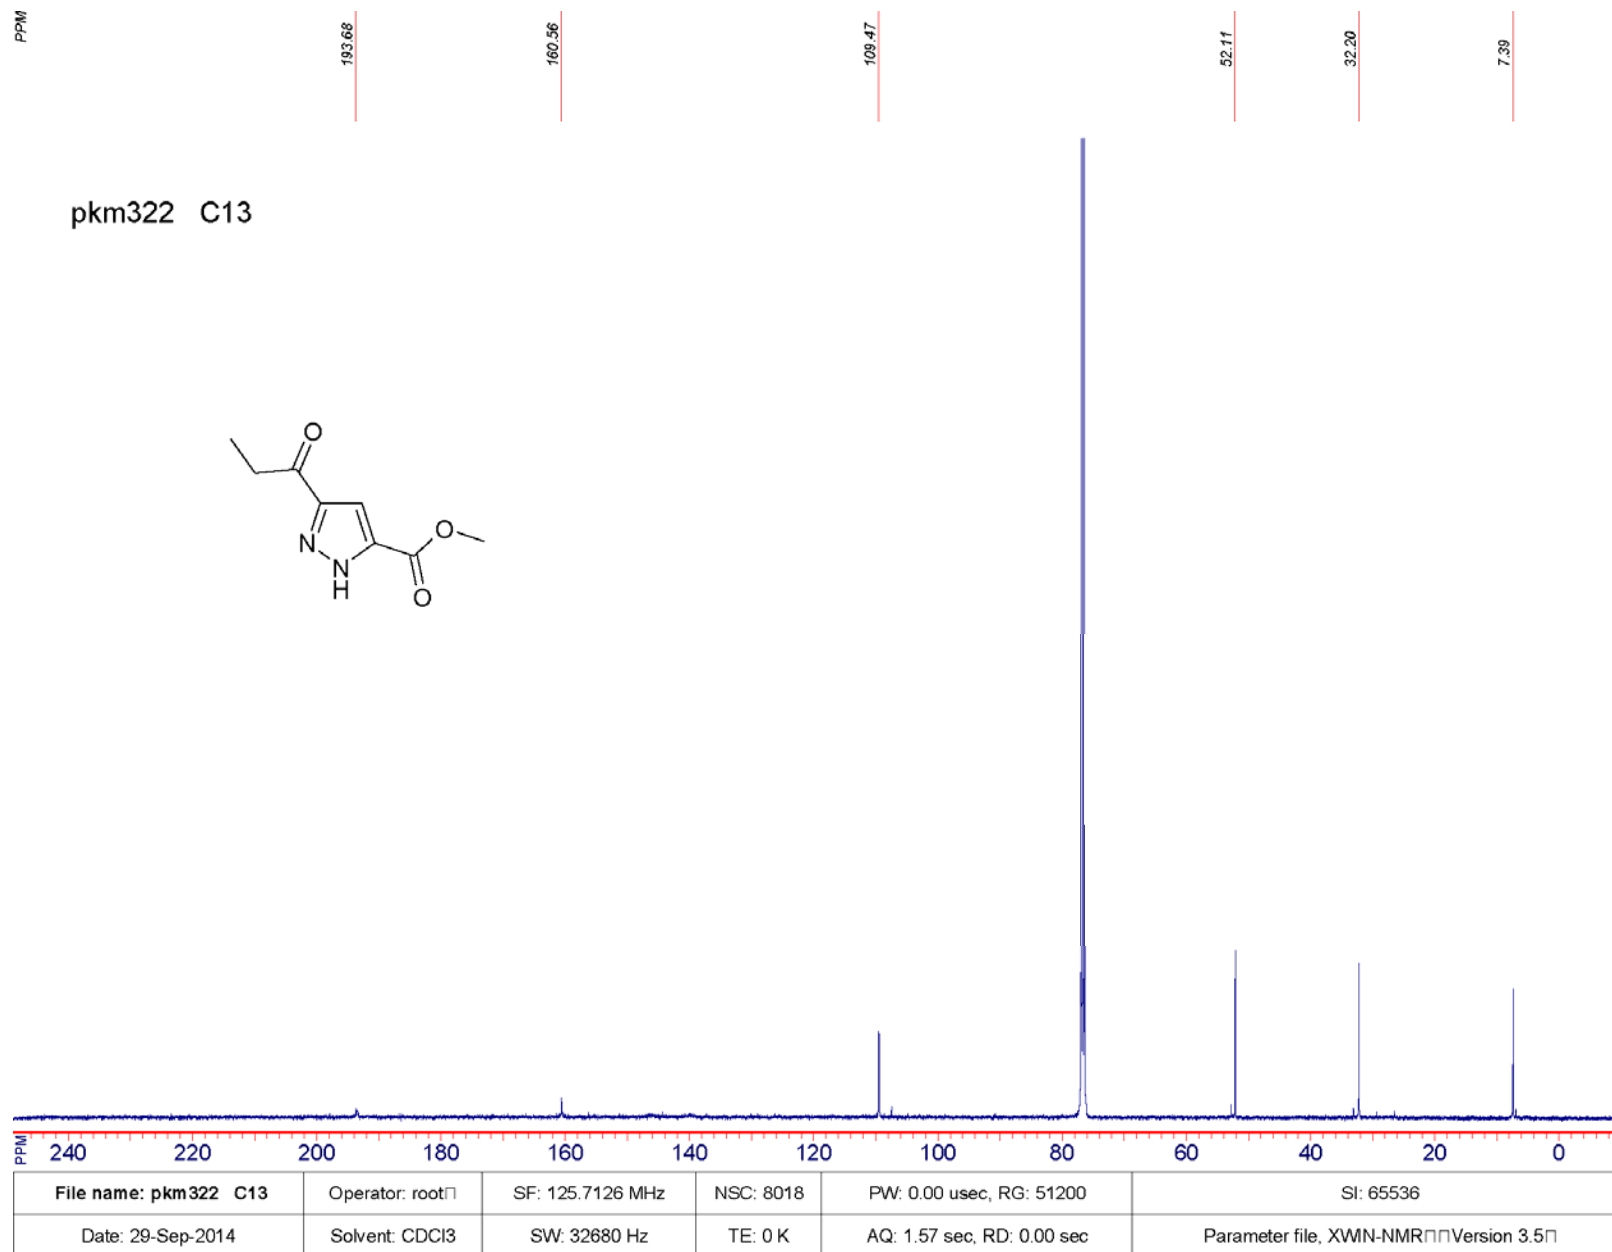

# Compound 10e

PPM

pkm288

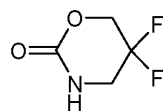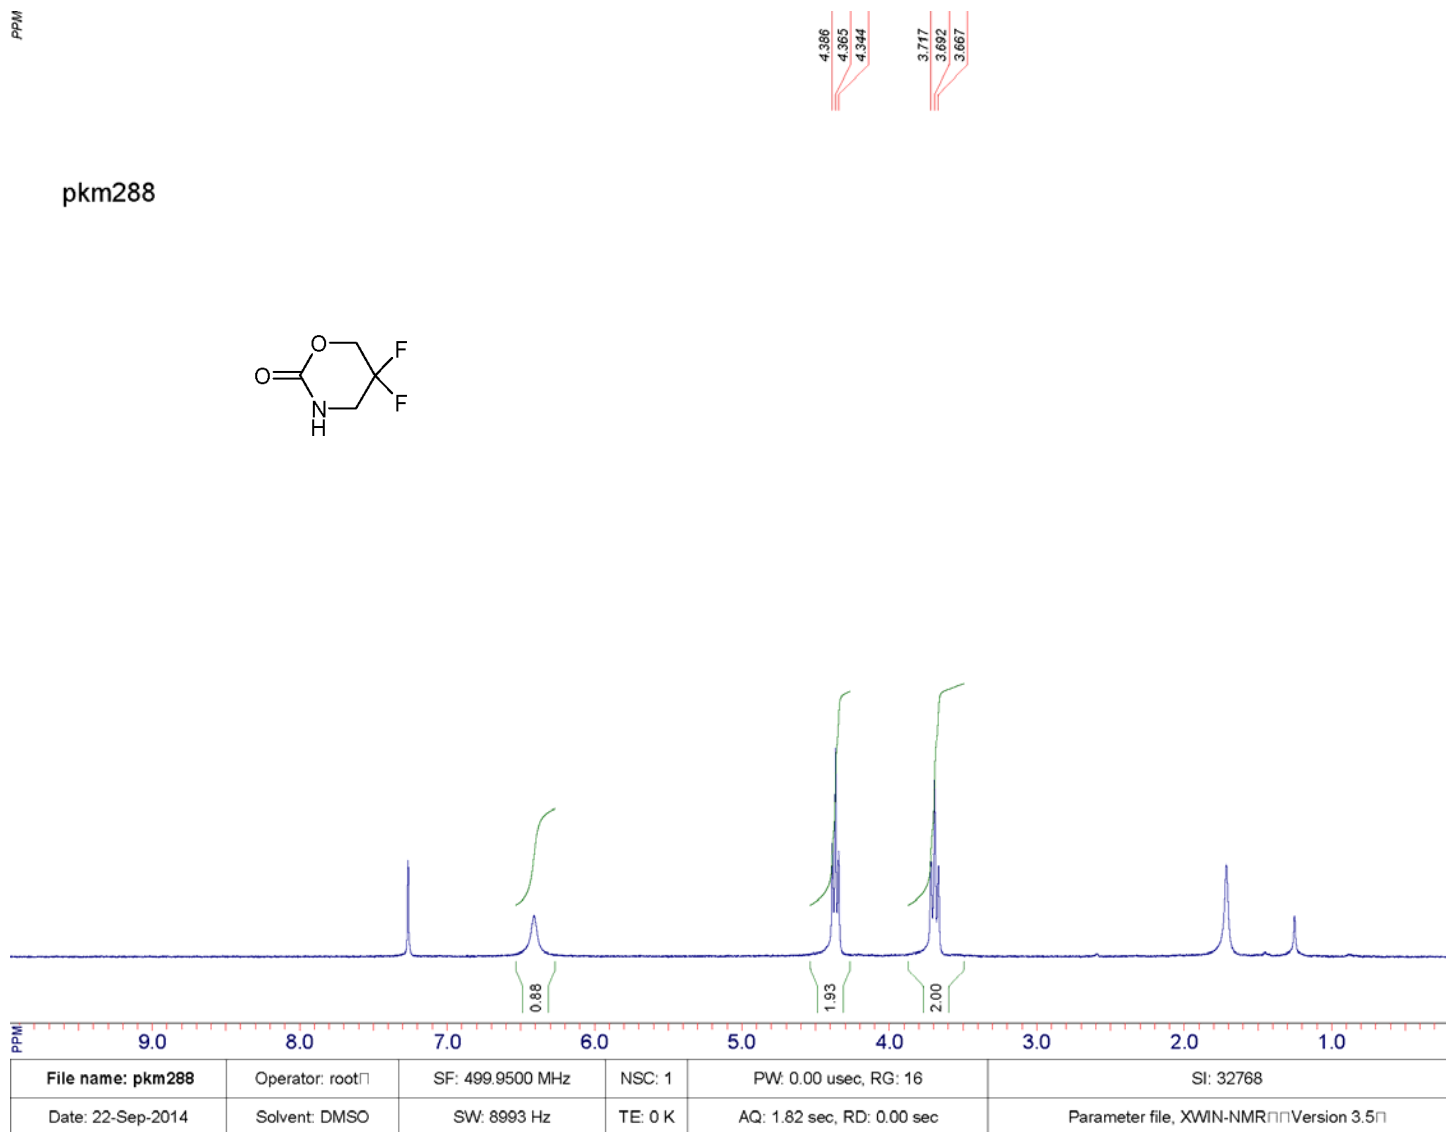

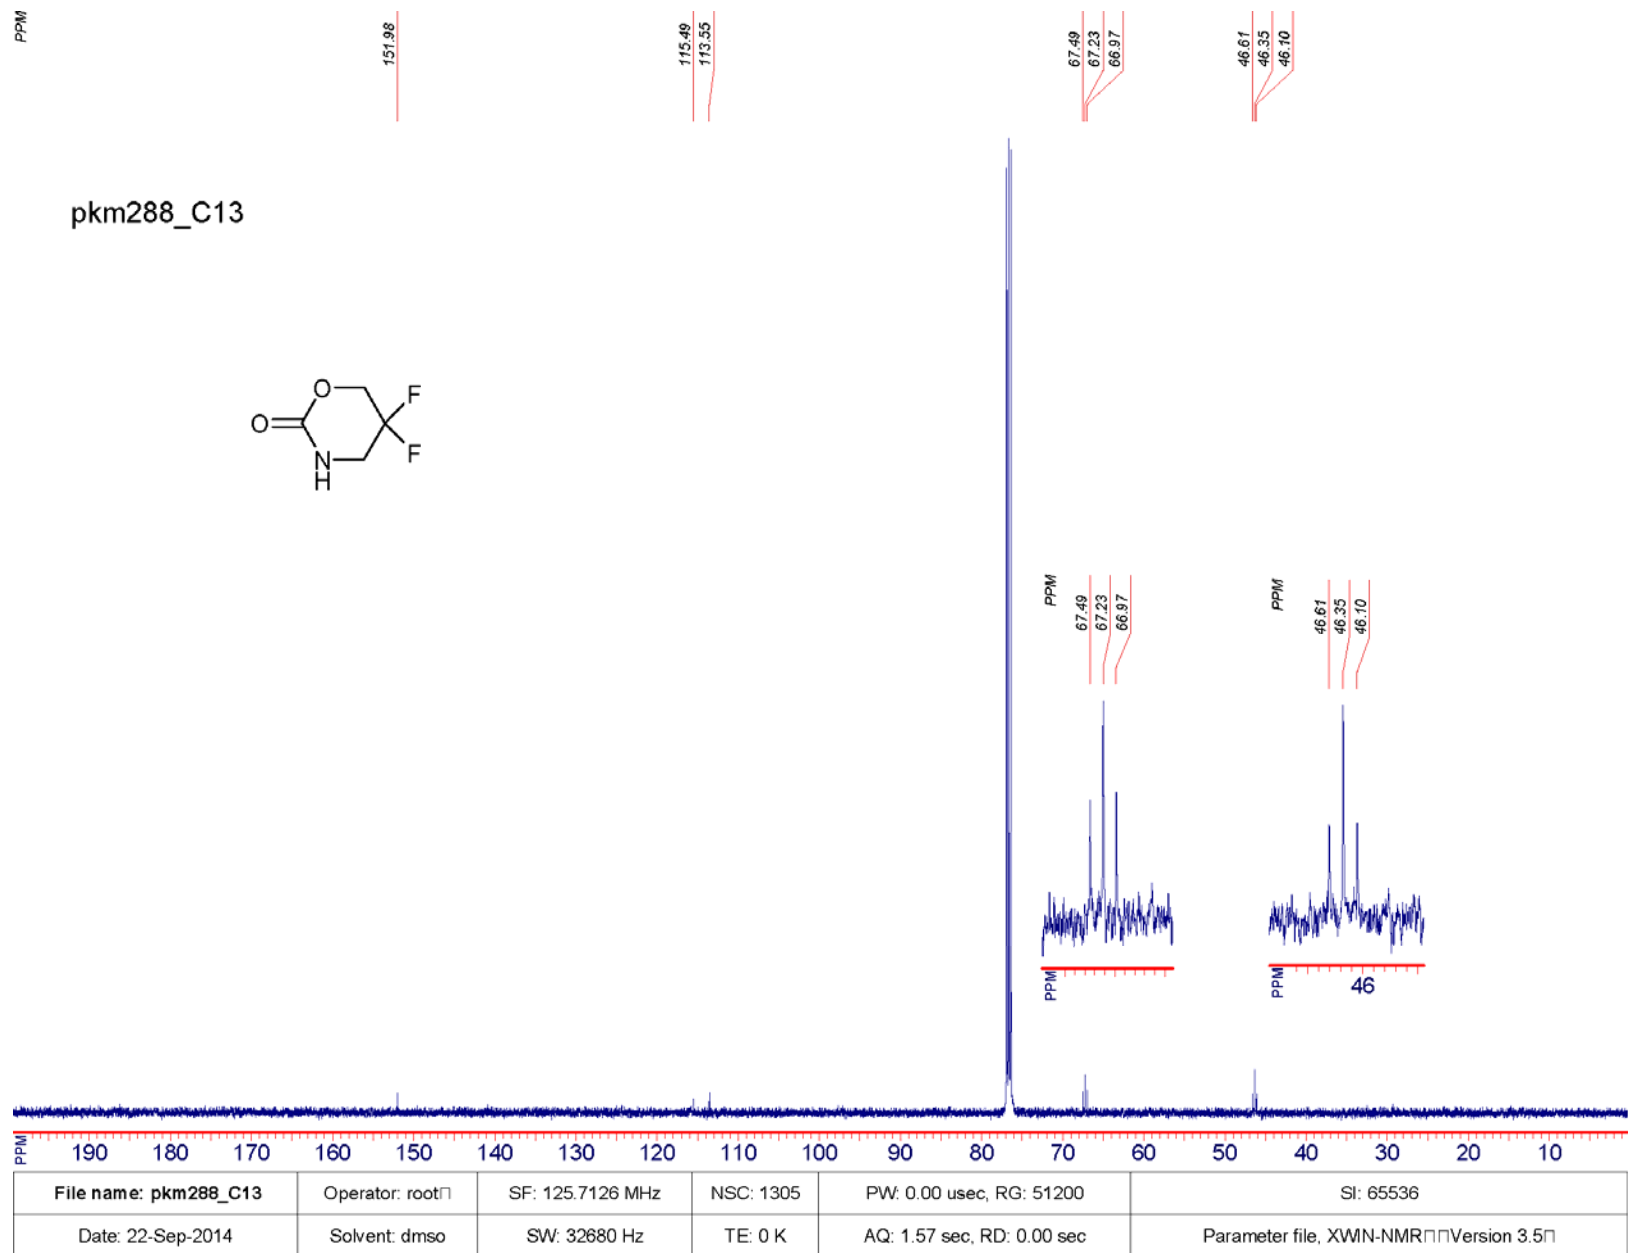



pkm288\_F19.fid

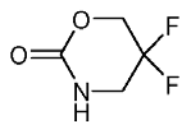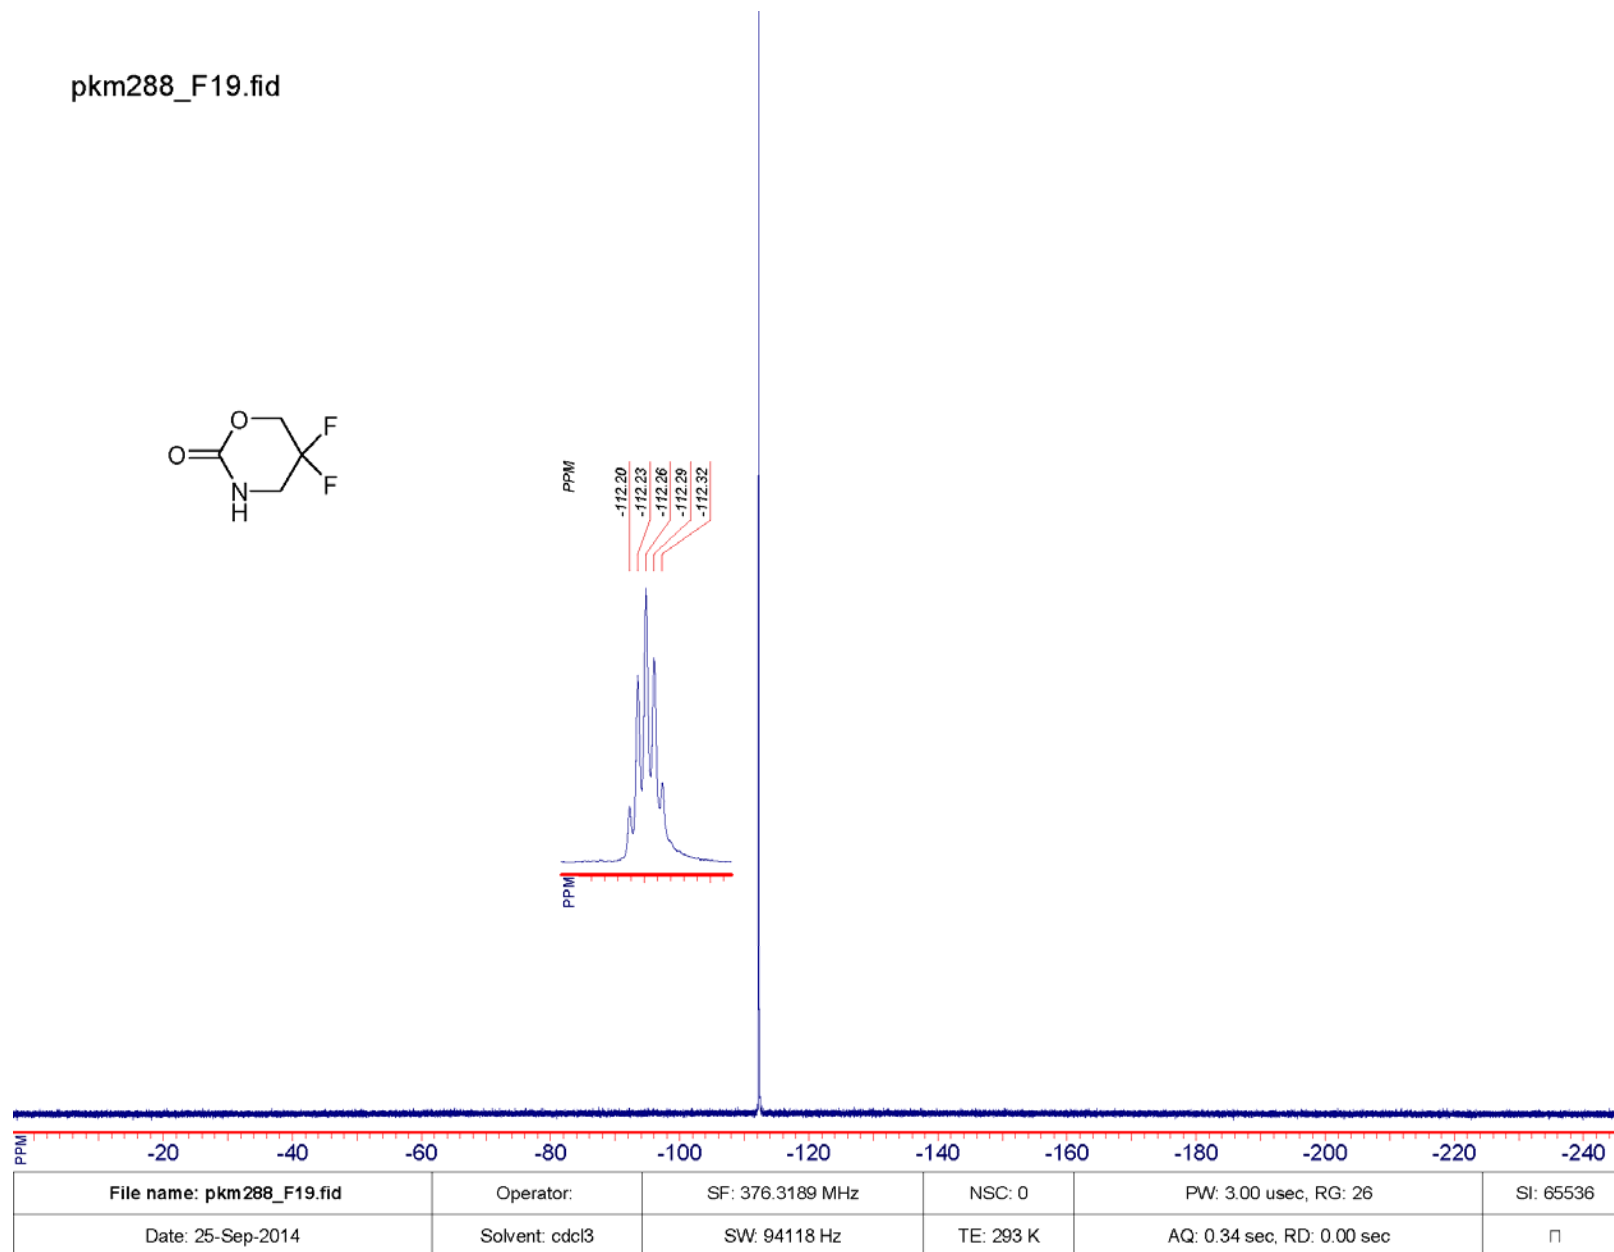

# Compound 12a

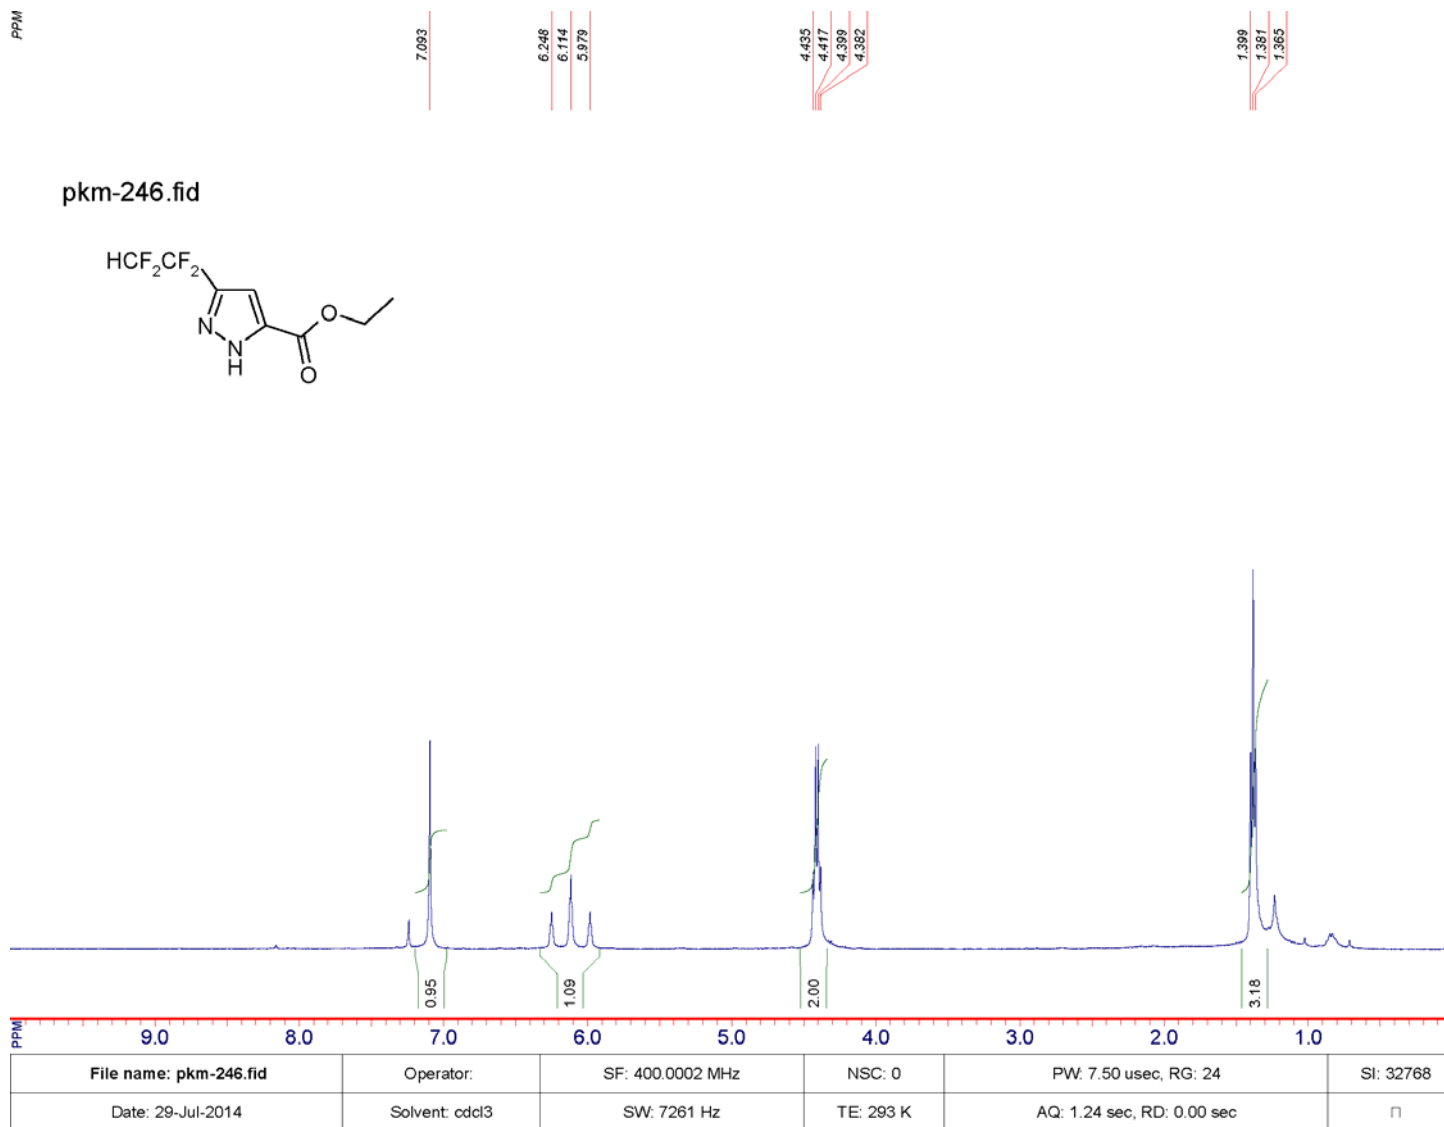

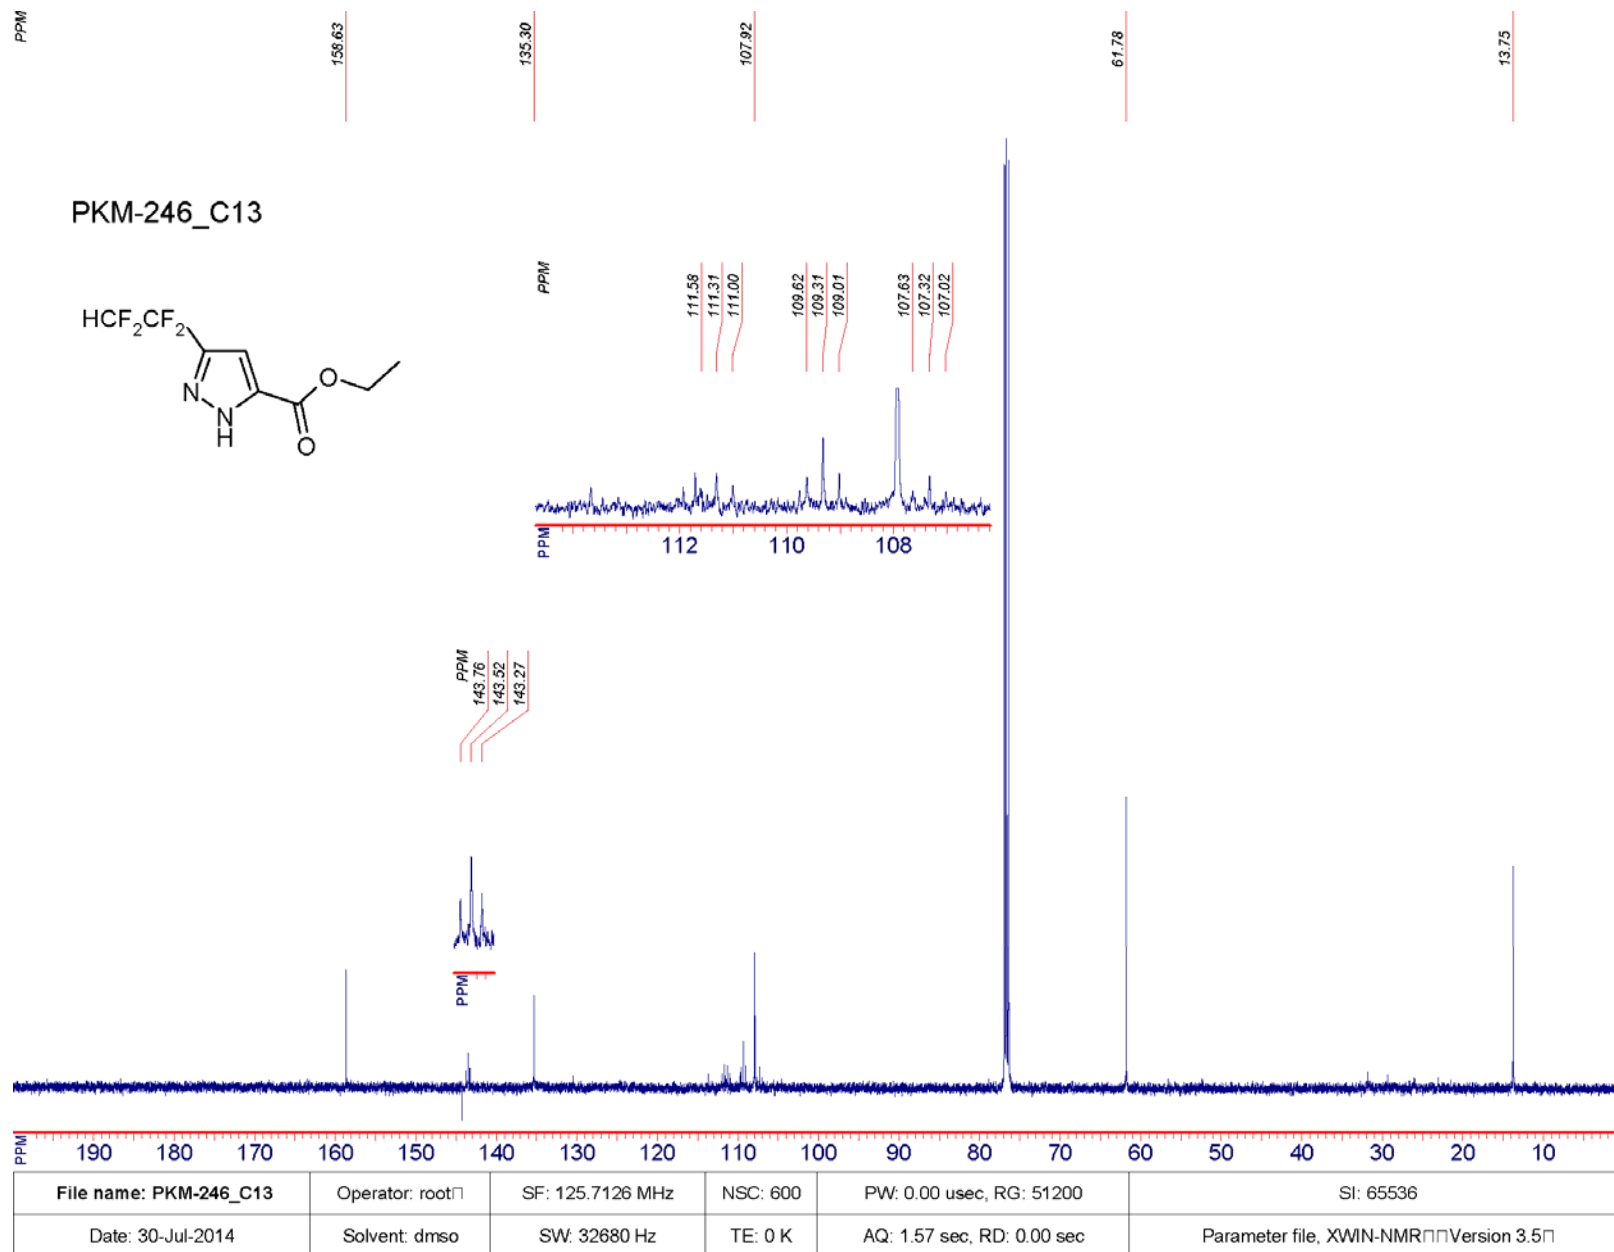

pkm246\_F19.fid

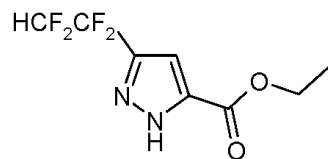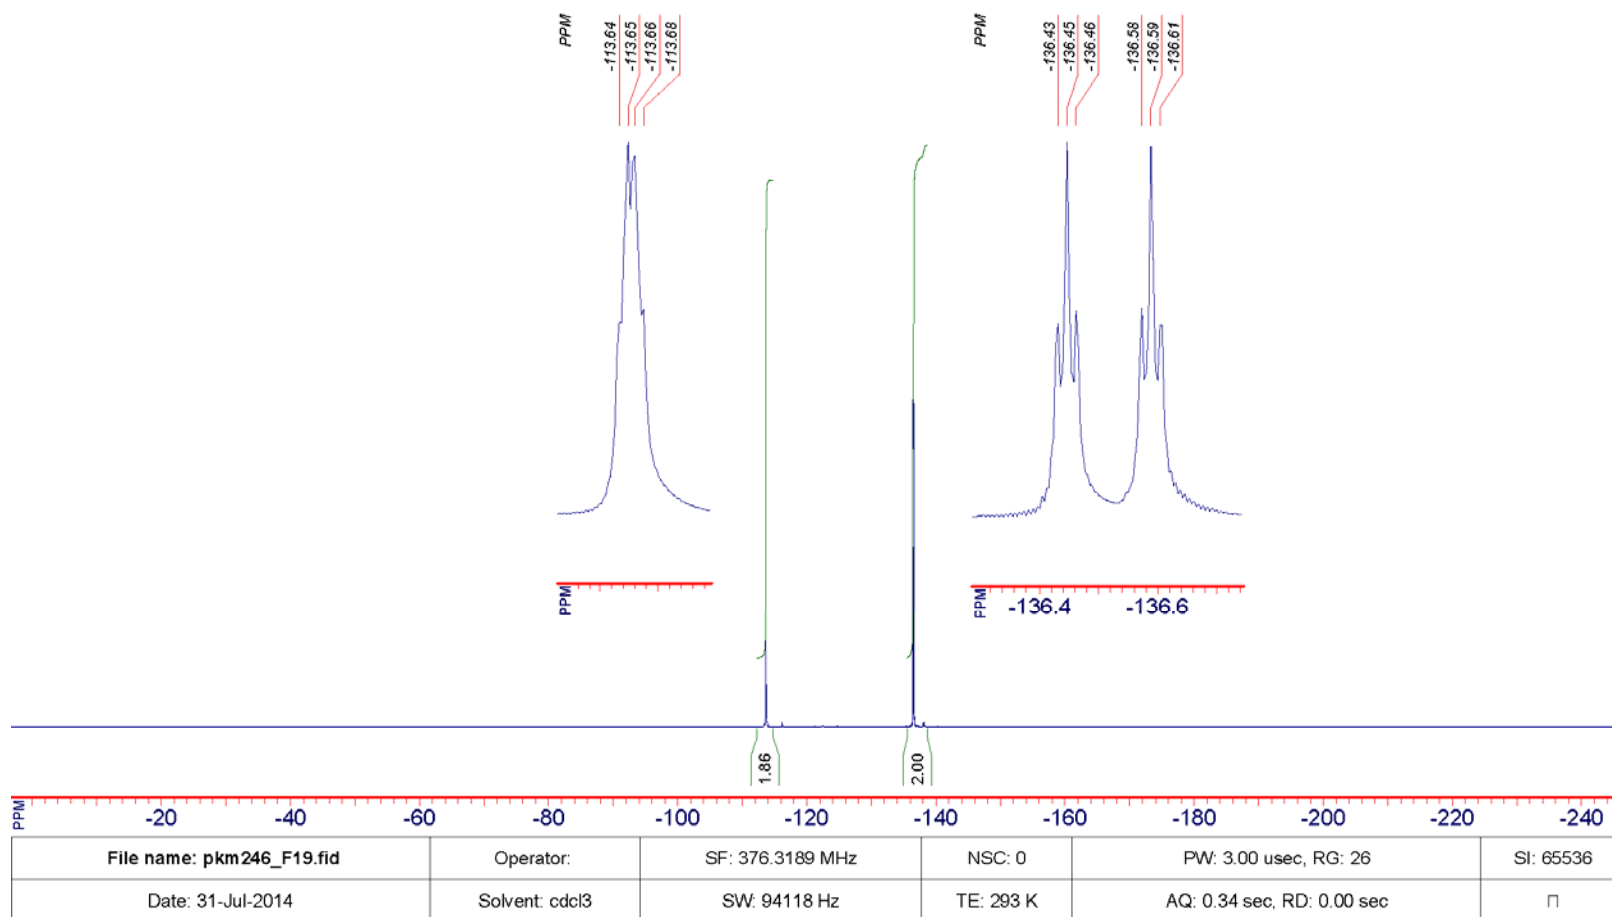

# Compound 13a

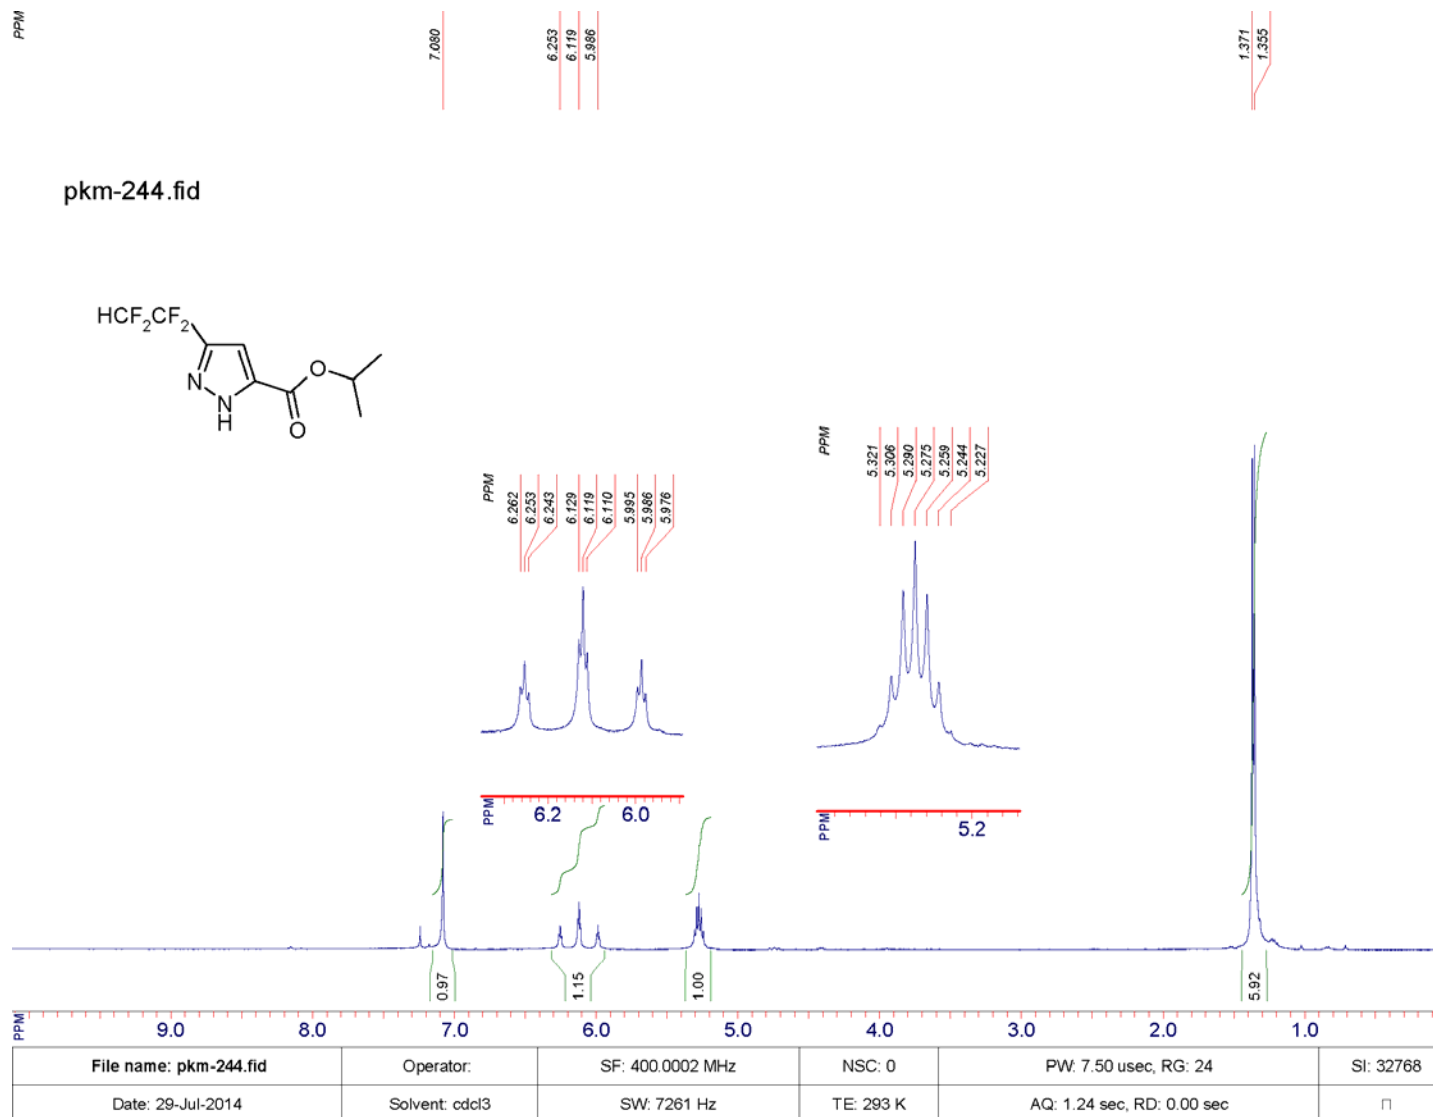

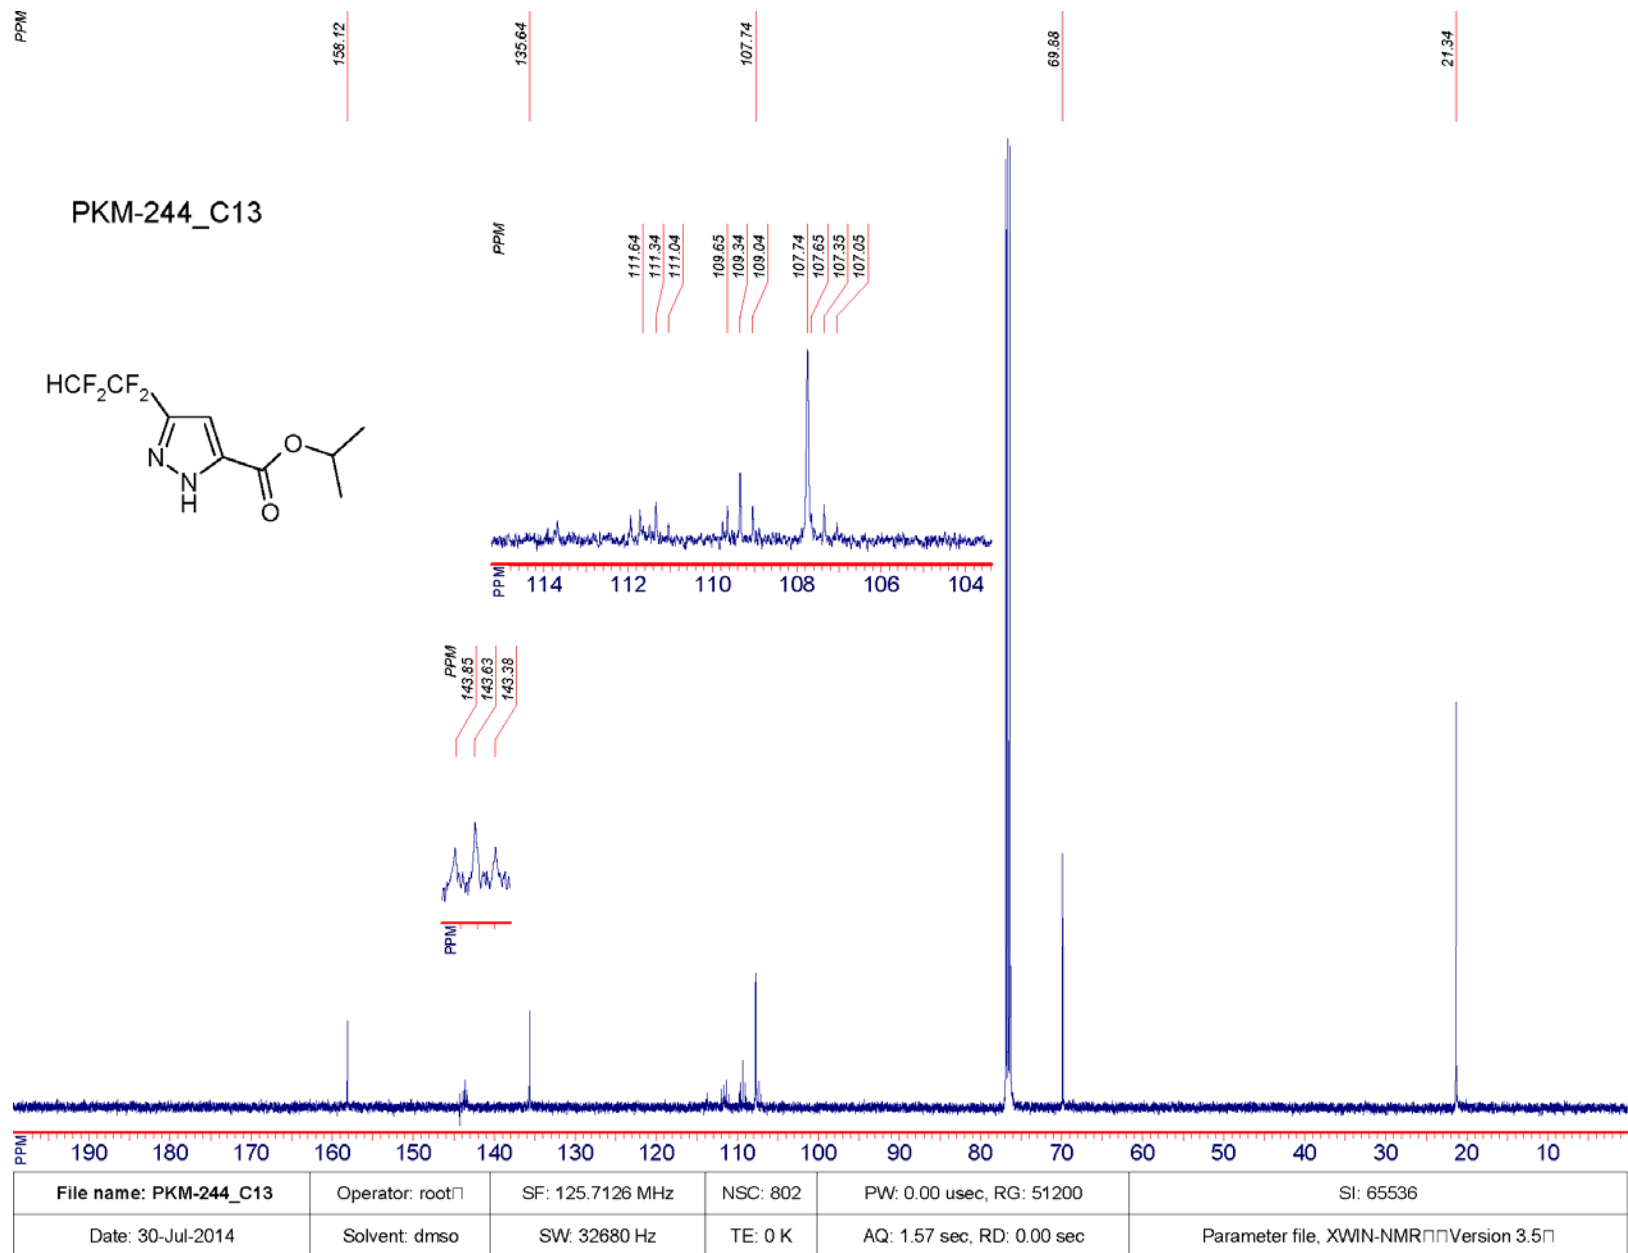

pkm244\_F19.fid

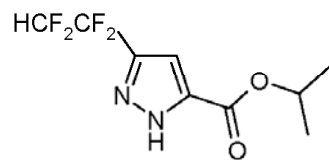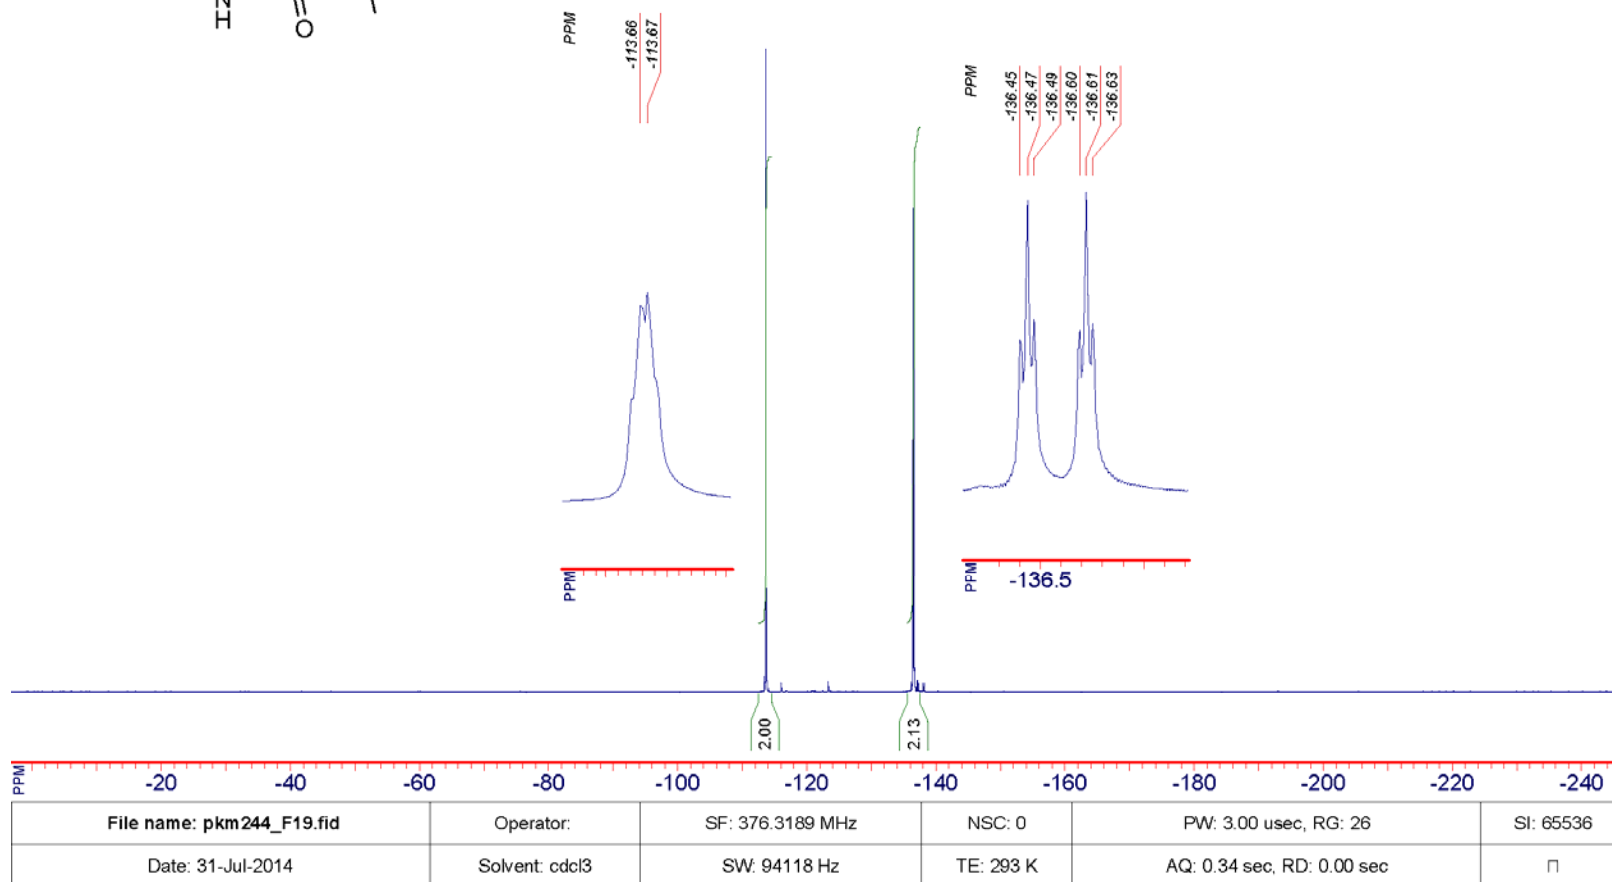

# Compound 14a

ppm

pkm259\_

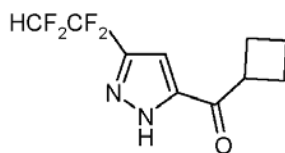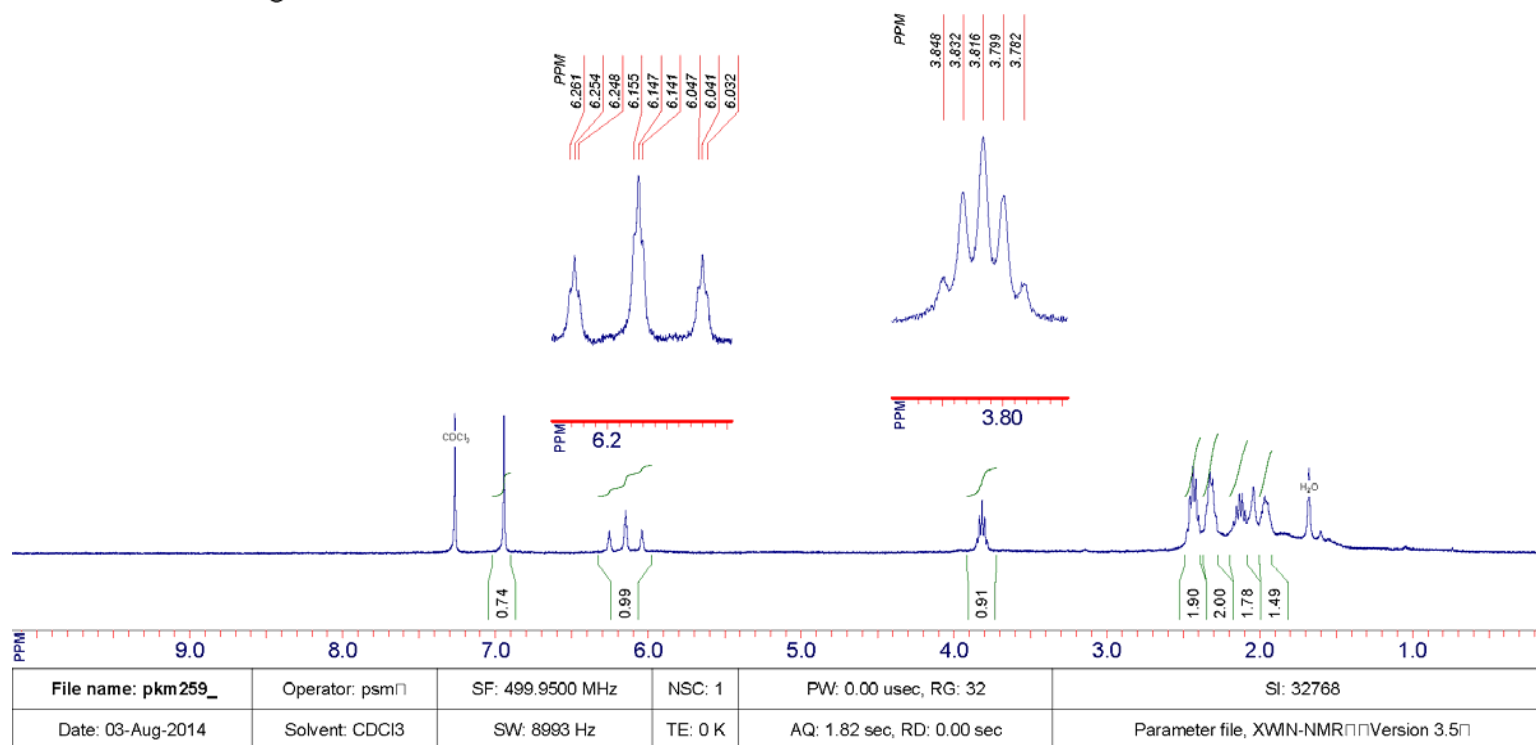



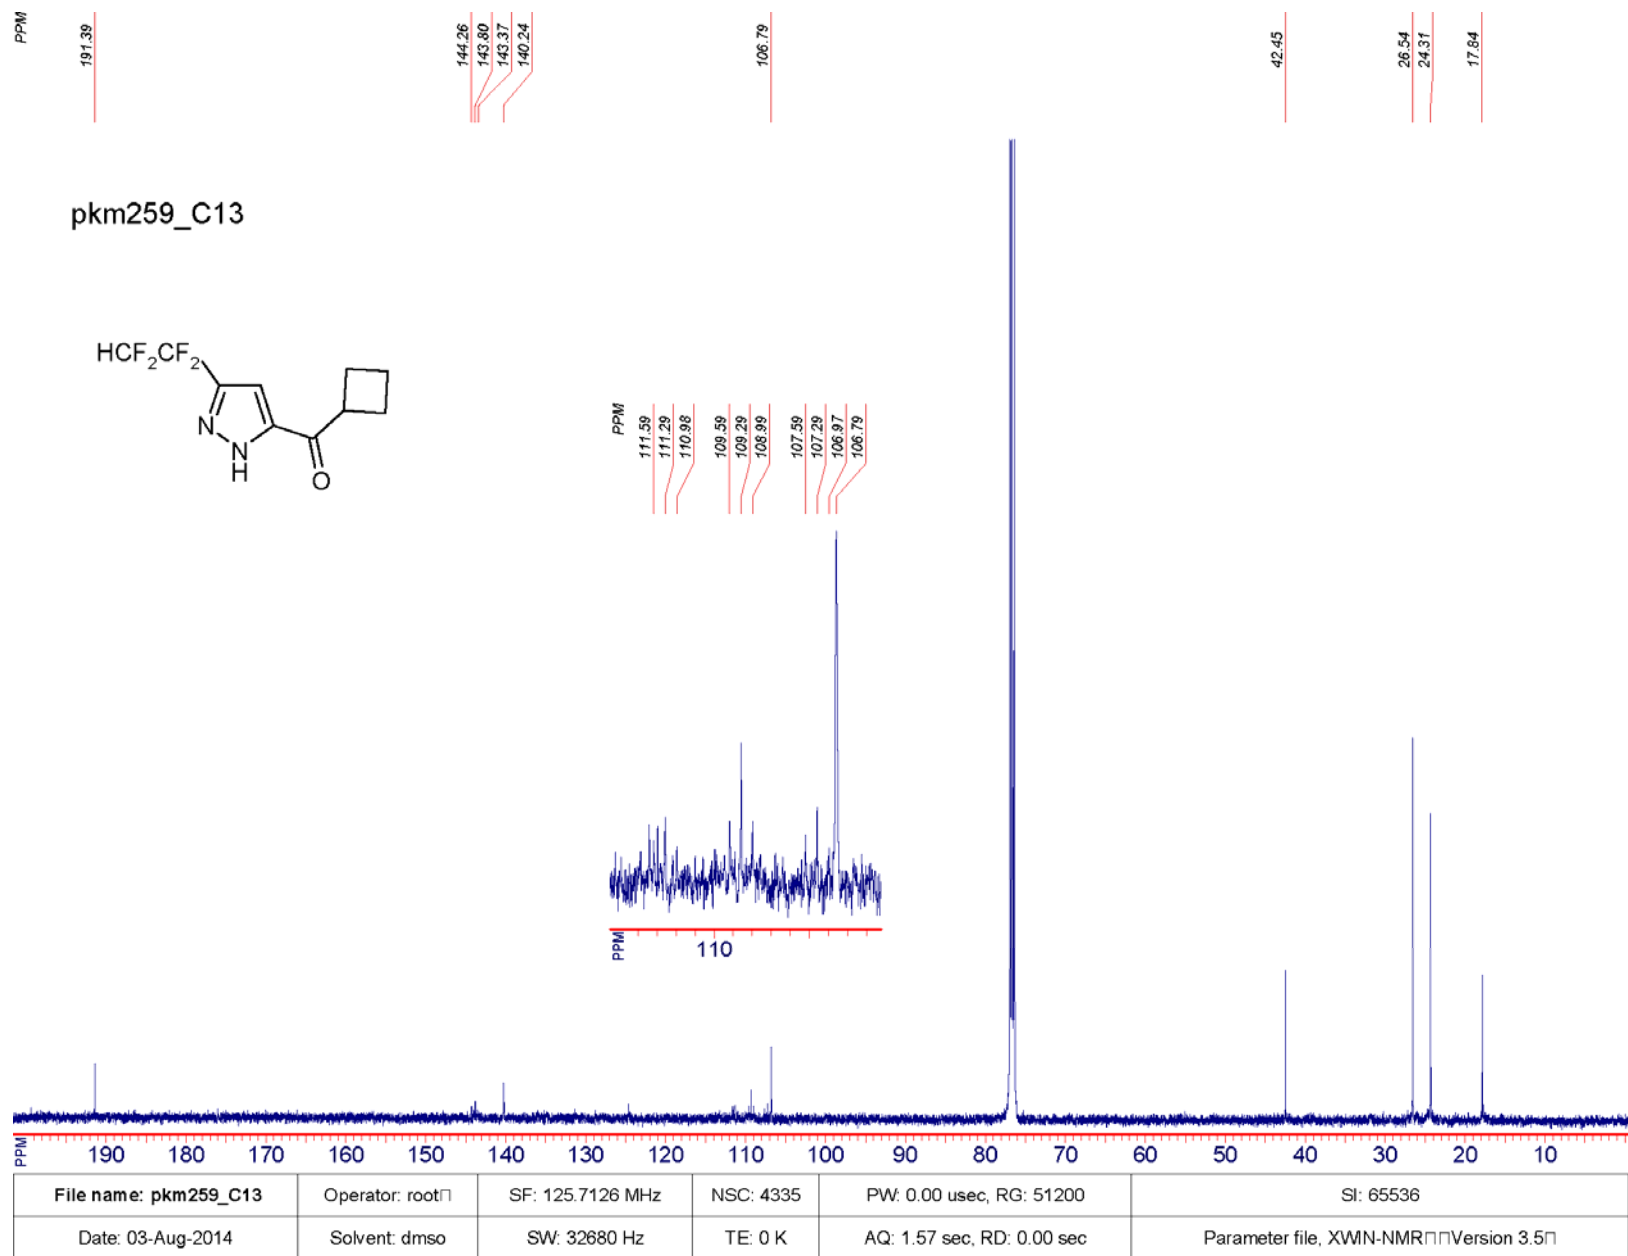

pkm259\_F19.fid

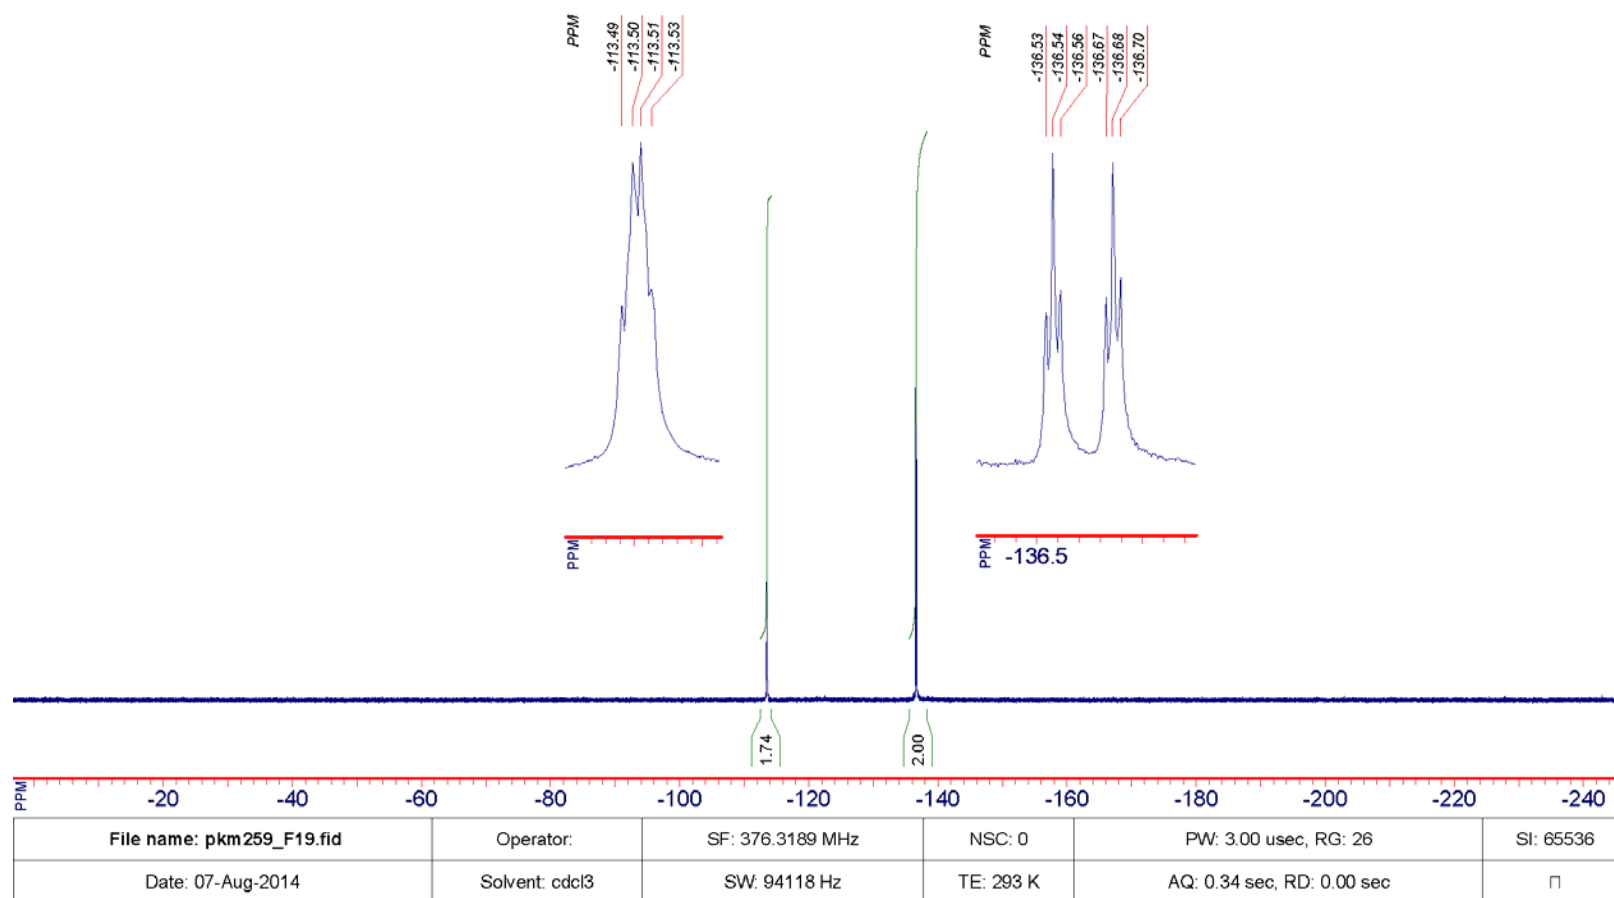

## Compound 15a

PPM

7.351  
7.239  
7.053

4.156

pkm-240.fid

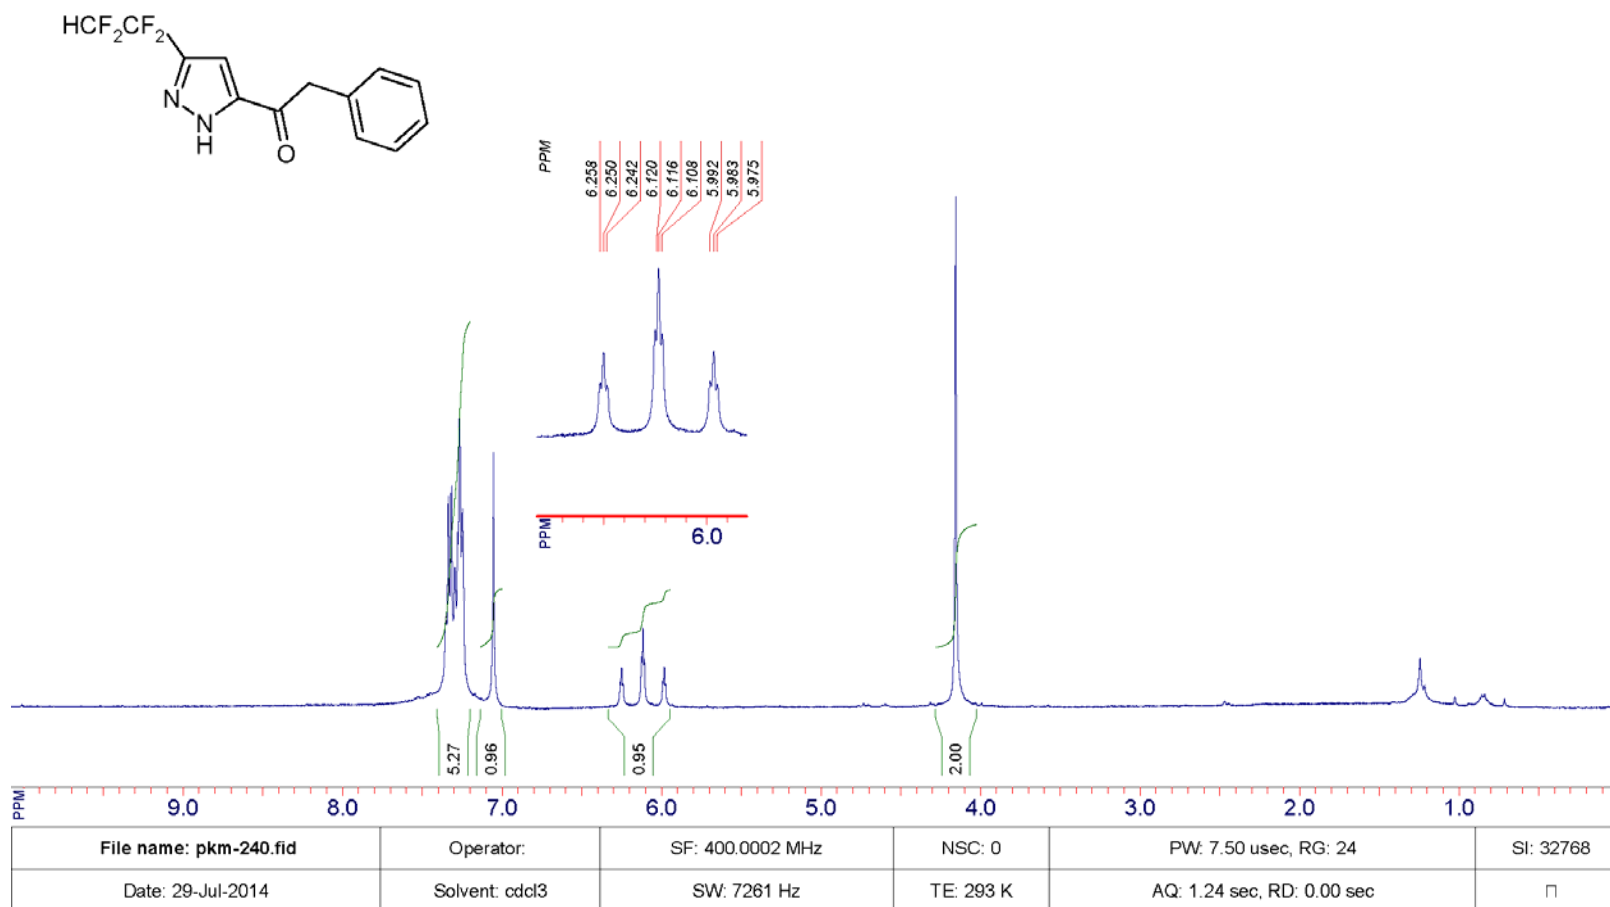

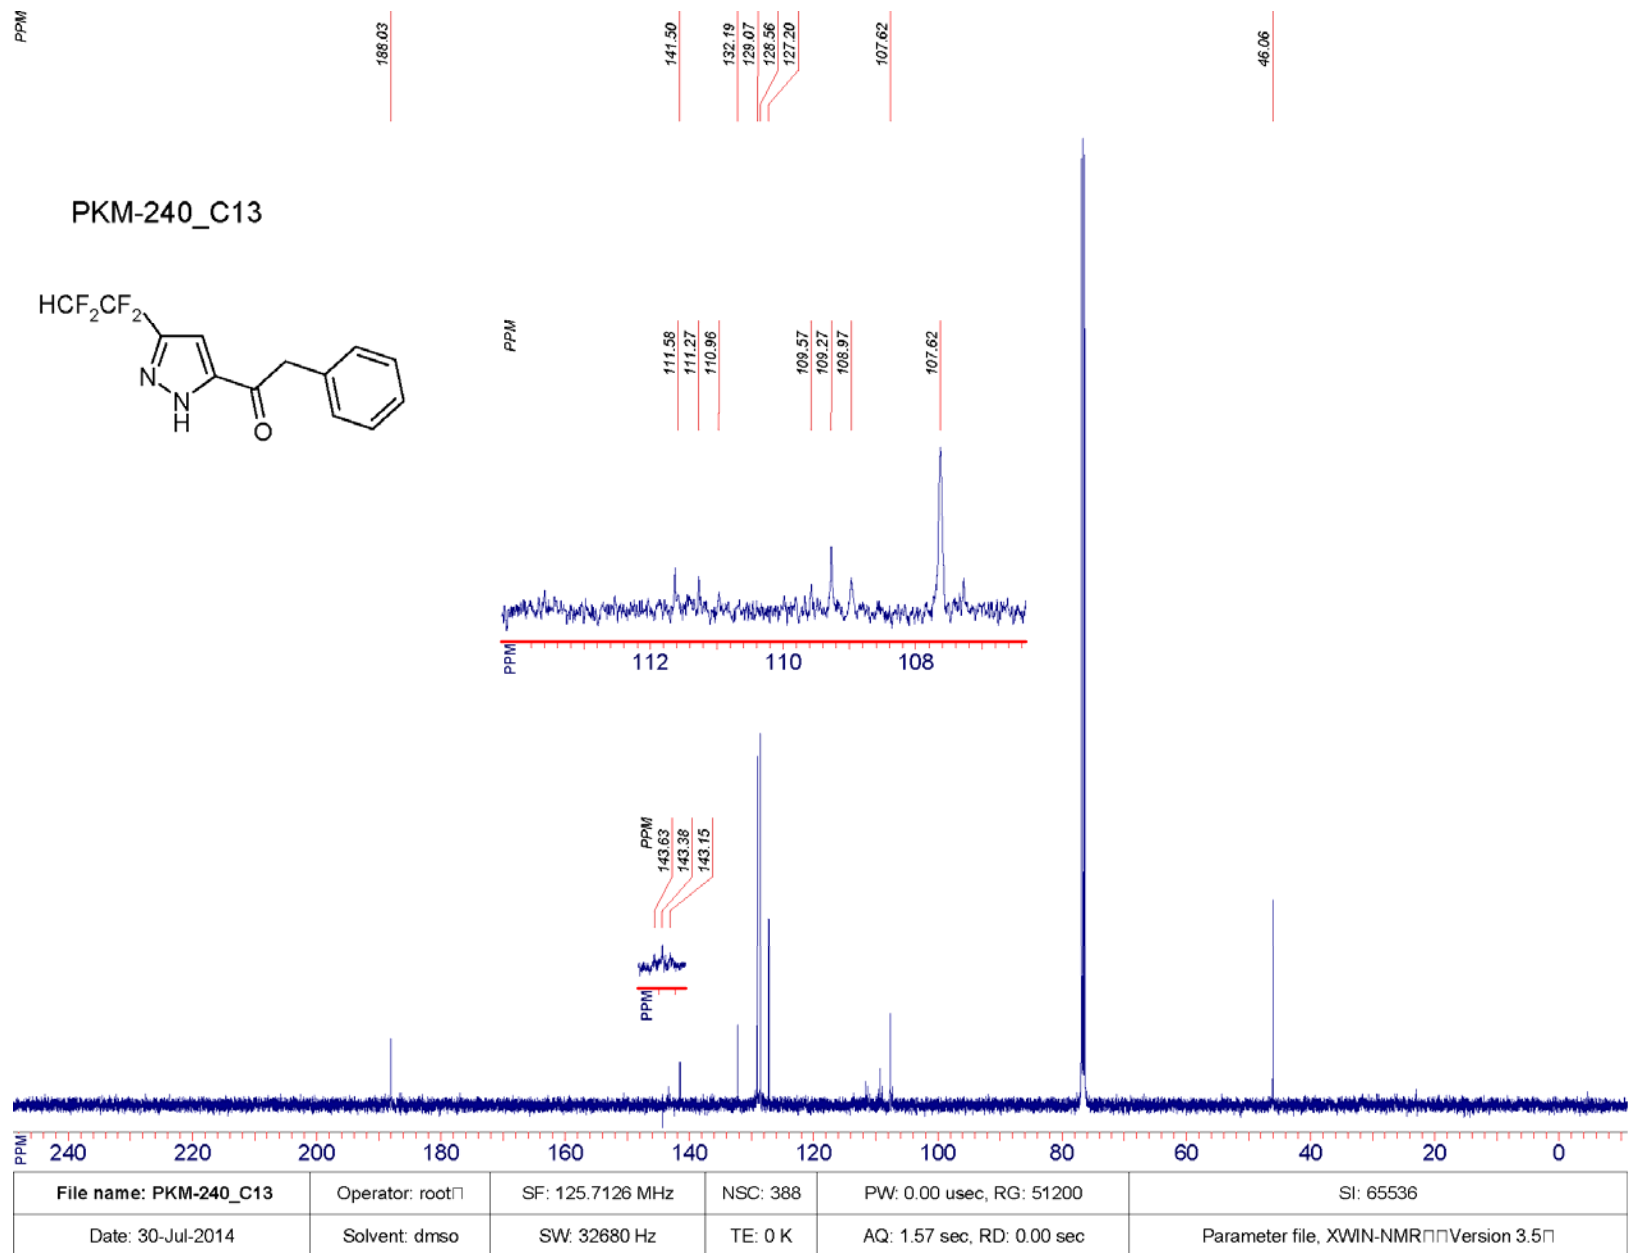

pkm240\_F19.fid

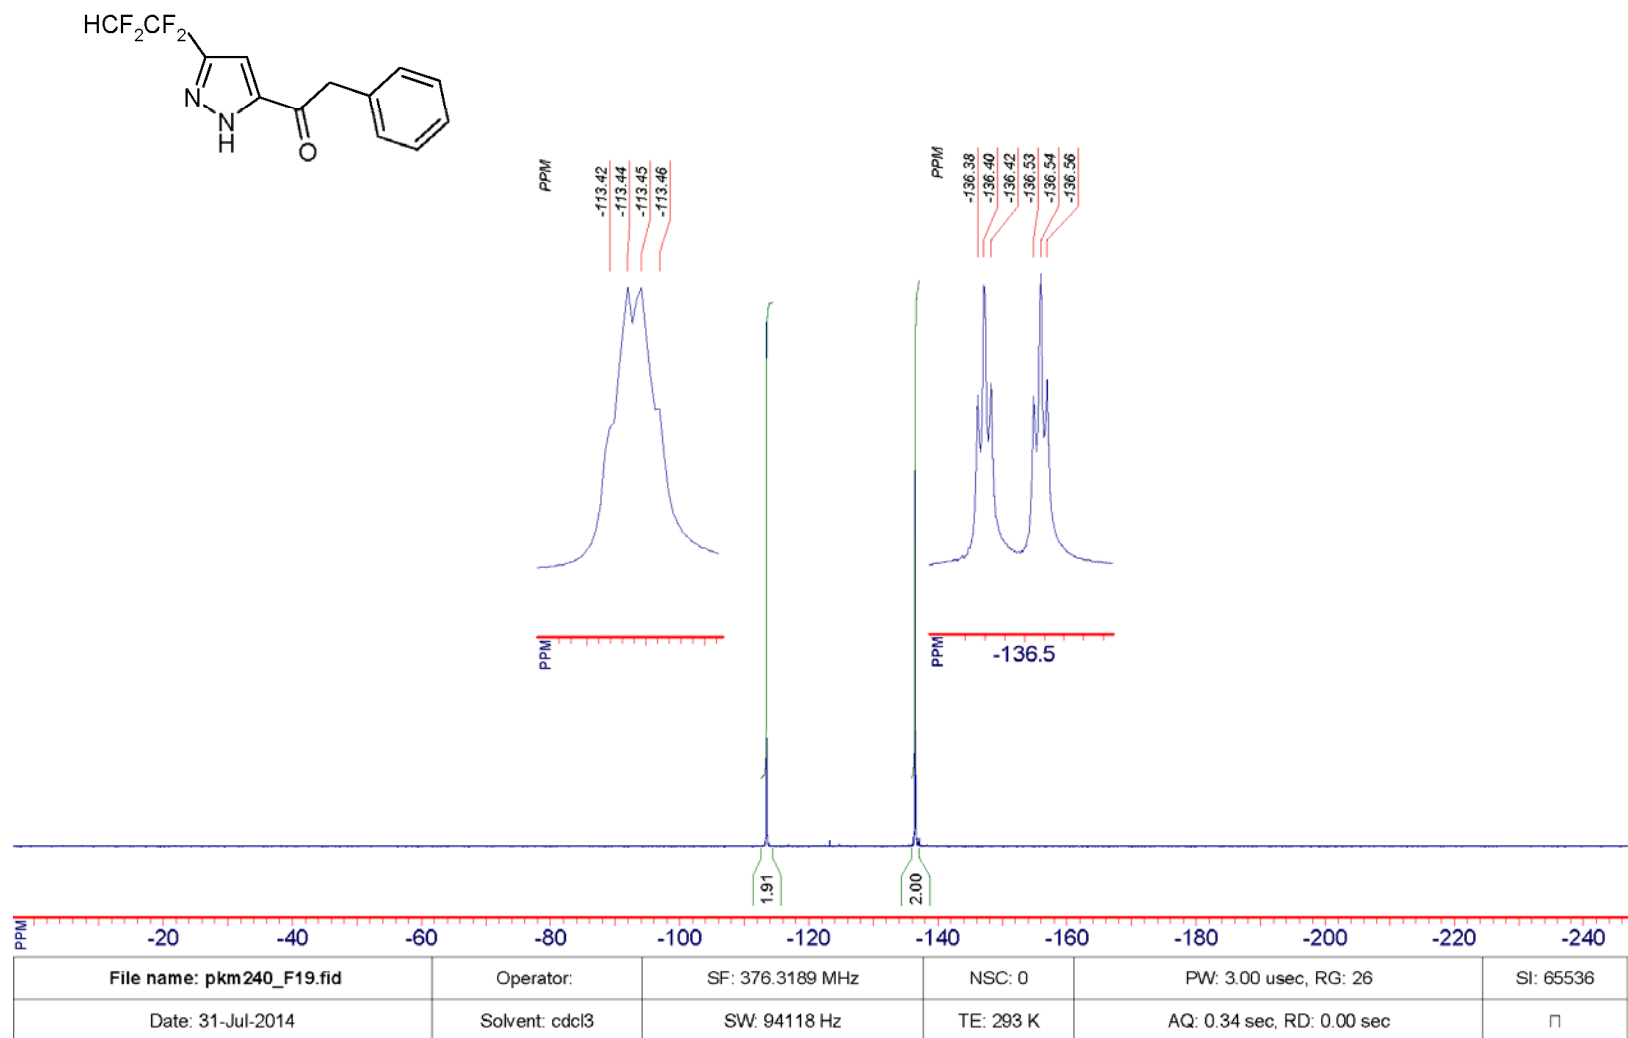

# Compound 16a

PPM

7.301  
7.181  
7.021

3.246  
3.227  
3.208  
3.084  
3.065  
3.047

pkm-247.fid

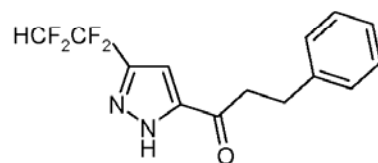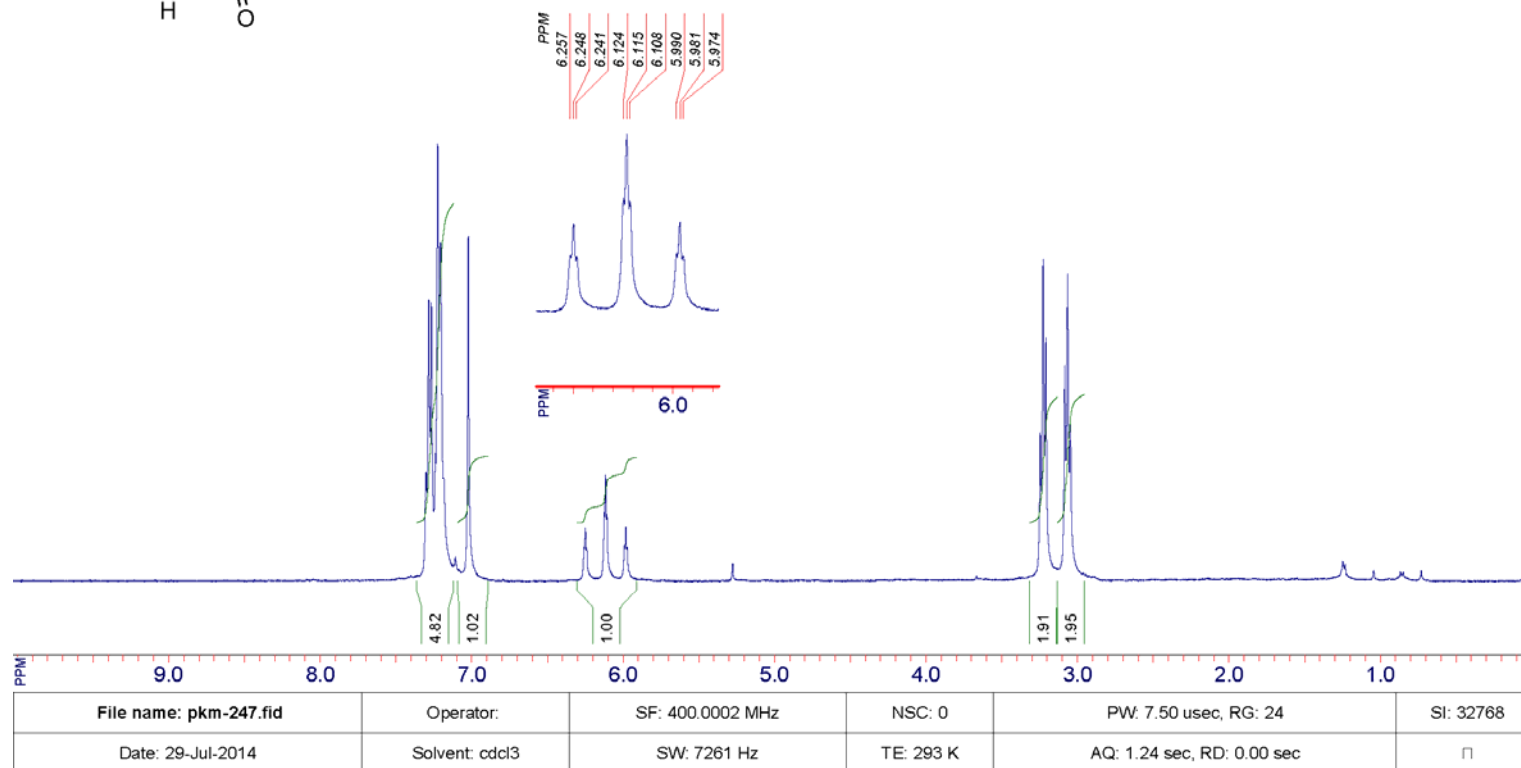

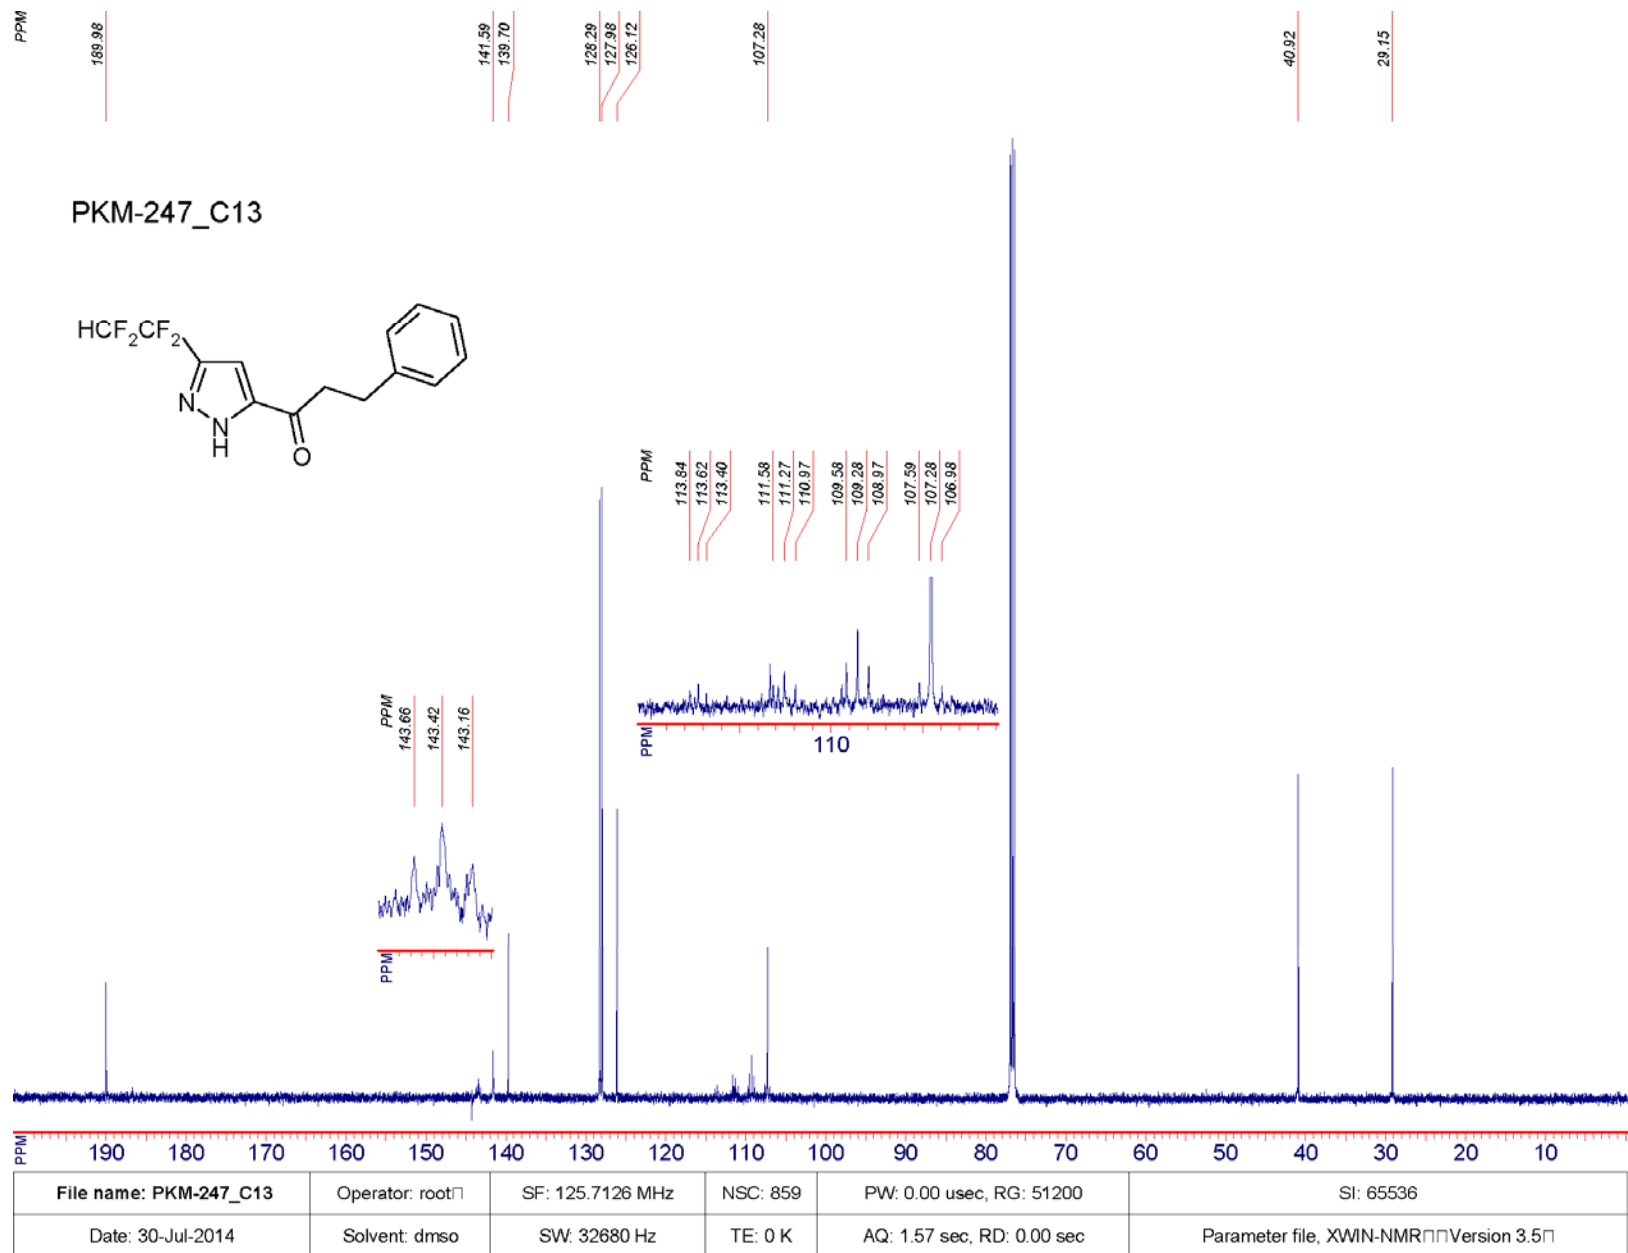



pkm247\_F19.fid

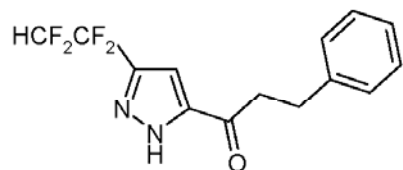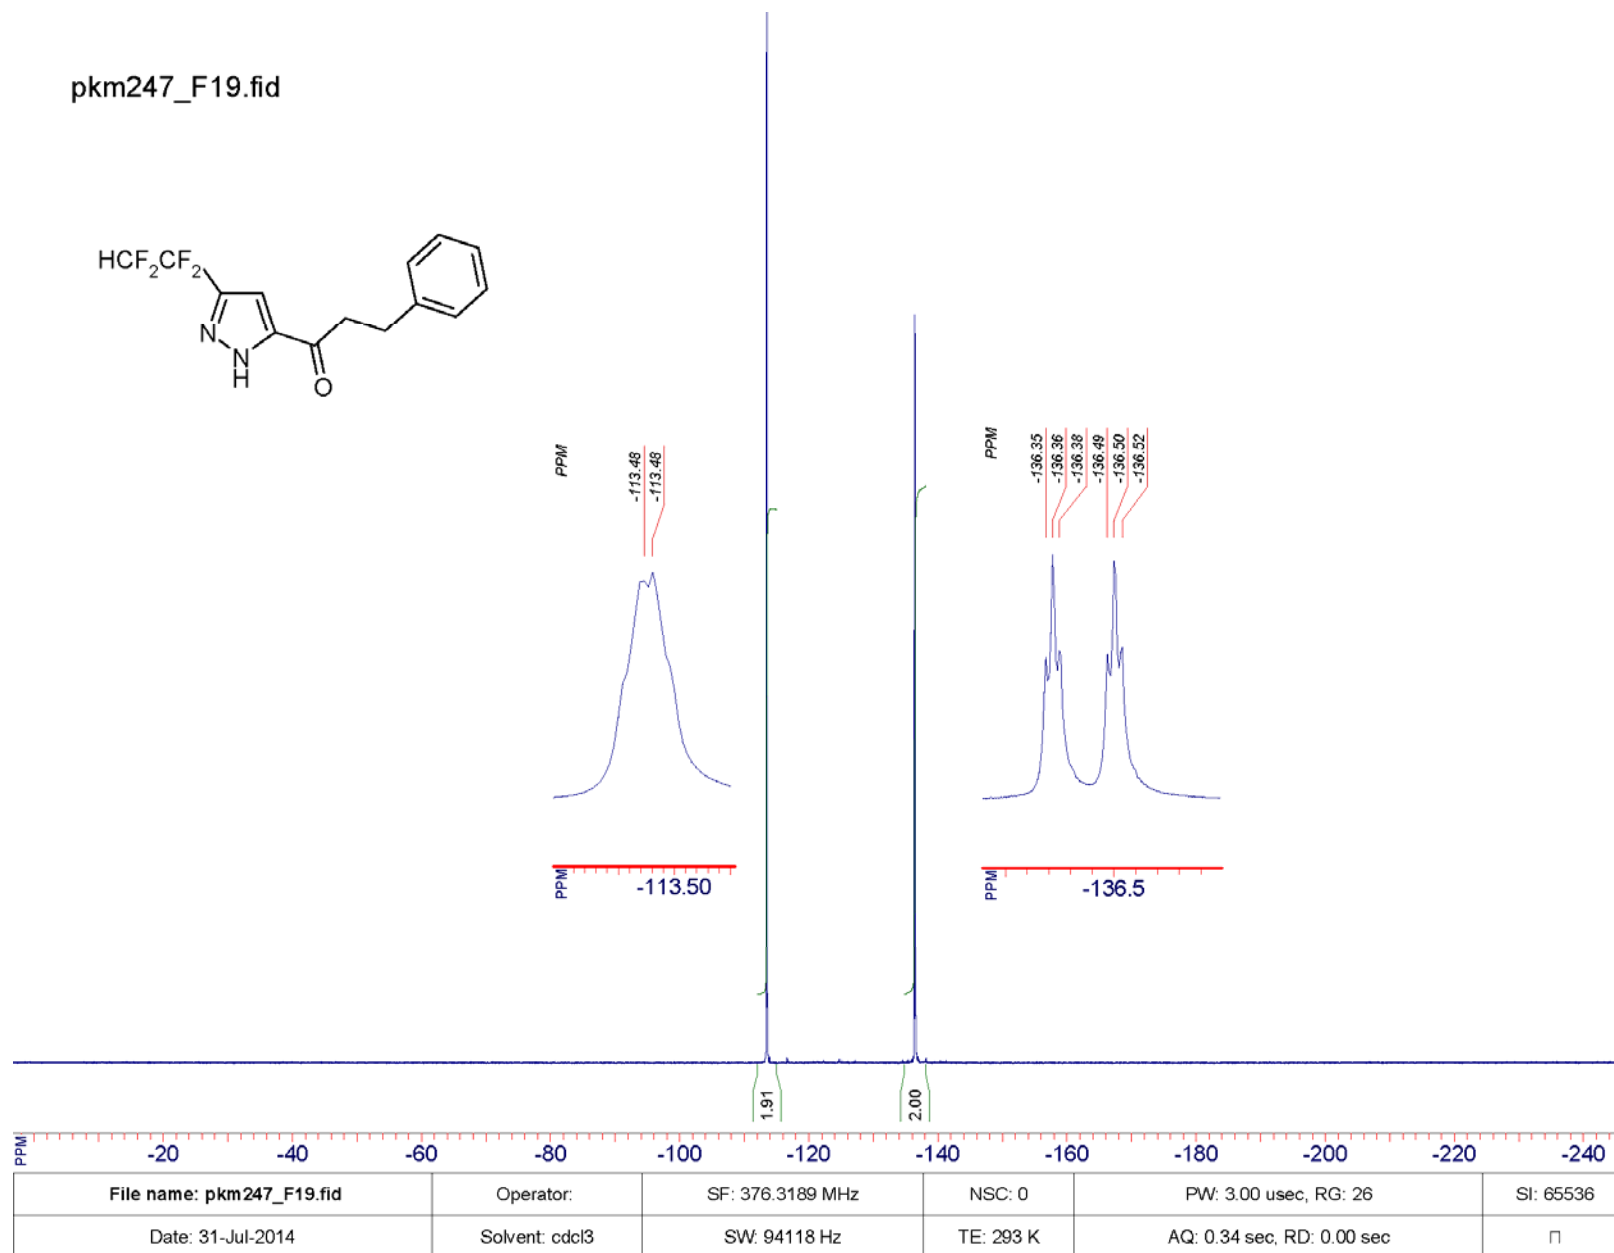

|                           |                |                  |           |                            |           |
|---------------------------|----------------|------------------|-----------|----------------------------|-----------|
| File name: pkm247_F19.fid | Operator:      | SF: 376.3189 MHz | NSC: 0    | PW: 3.00 usec, RG: 26      | SI: 65536 |
| Date: 31-Jul-2014         | Solvent: cdcl3 | SW: 94118 Hz     | TE: 293 K | AQ: 0.34 sec, RD: 0.00 sec | □         |

# Compound 17a

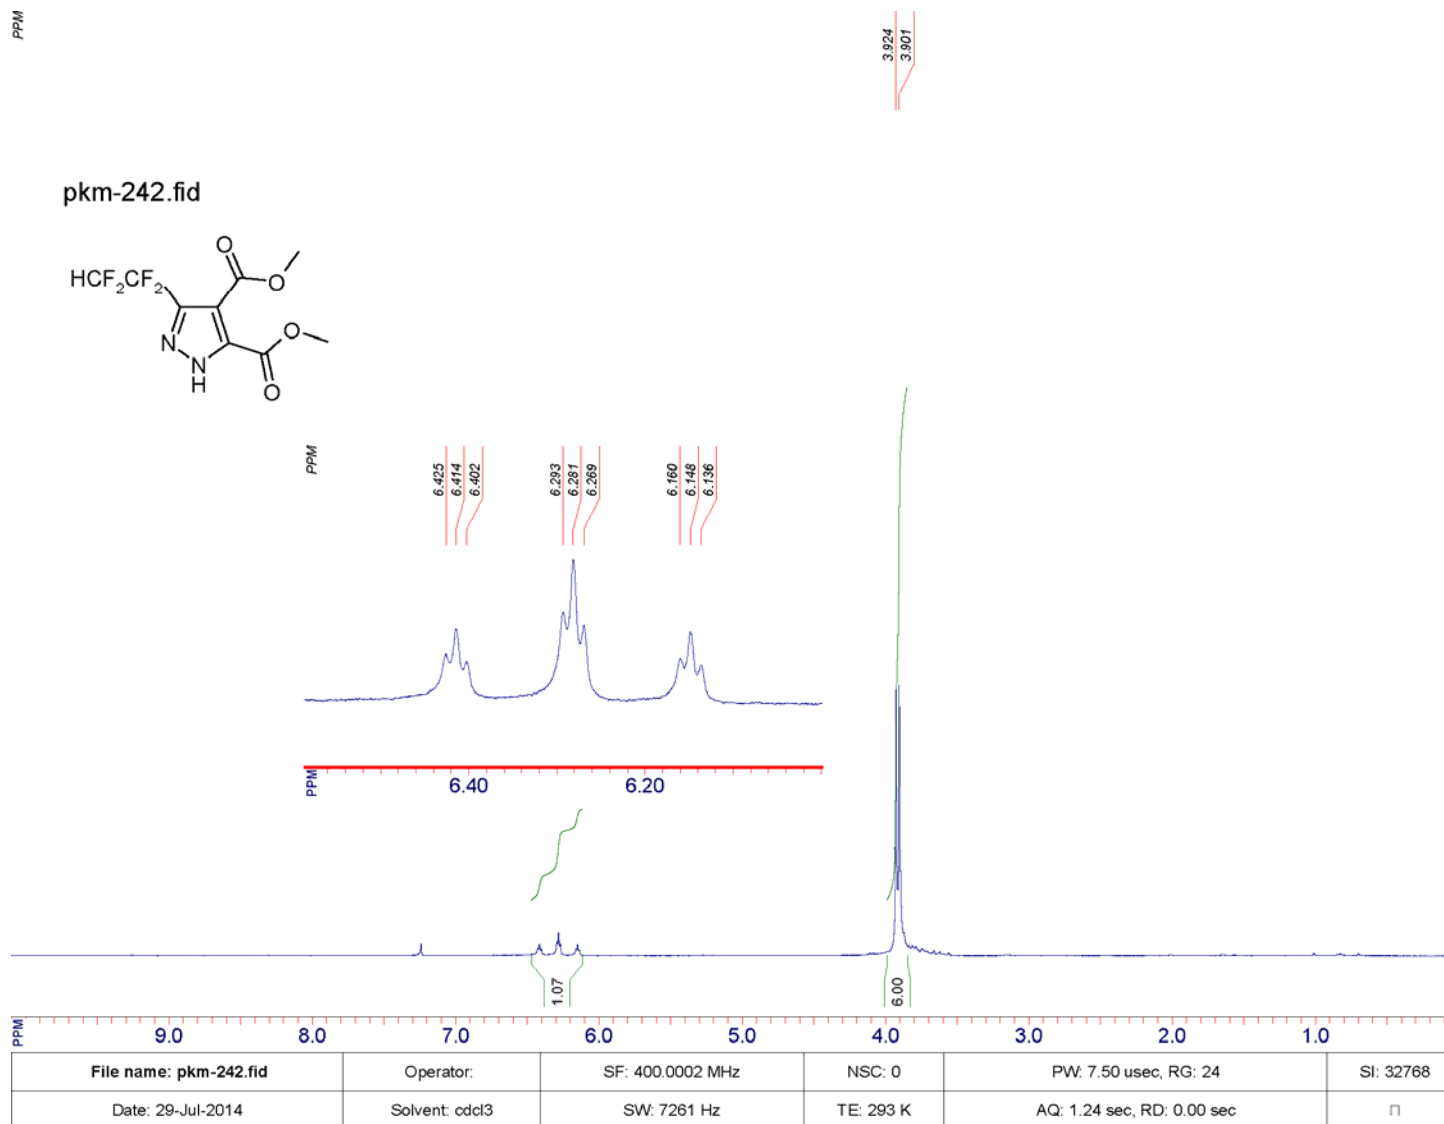

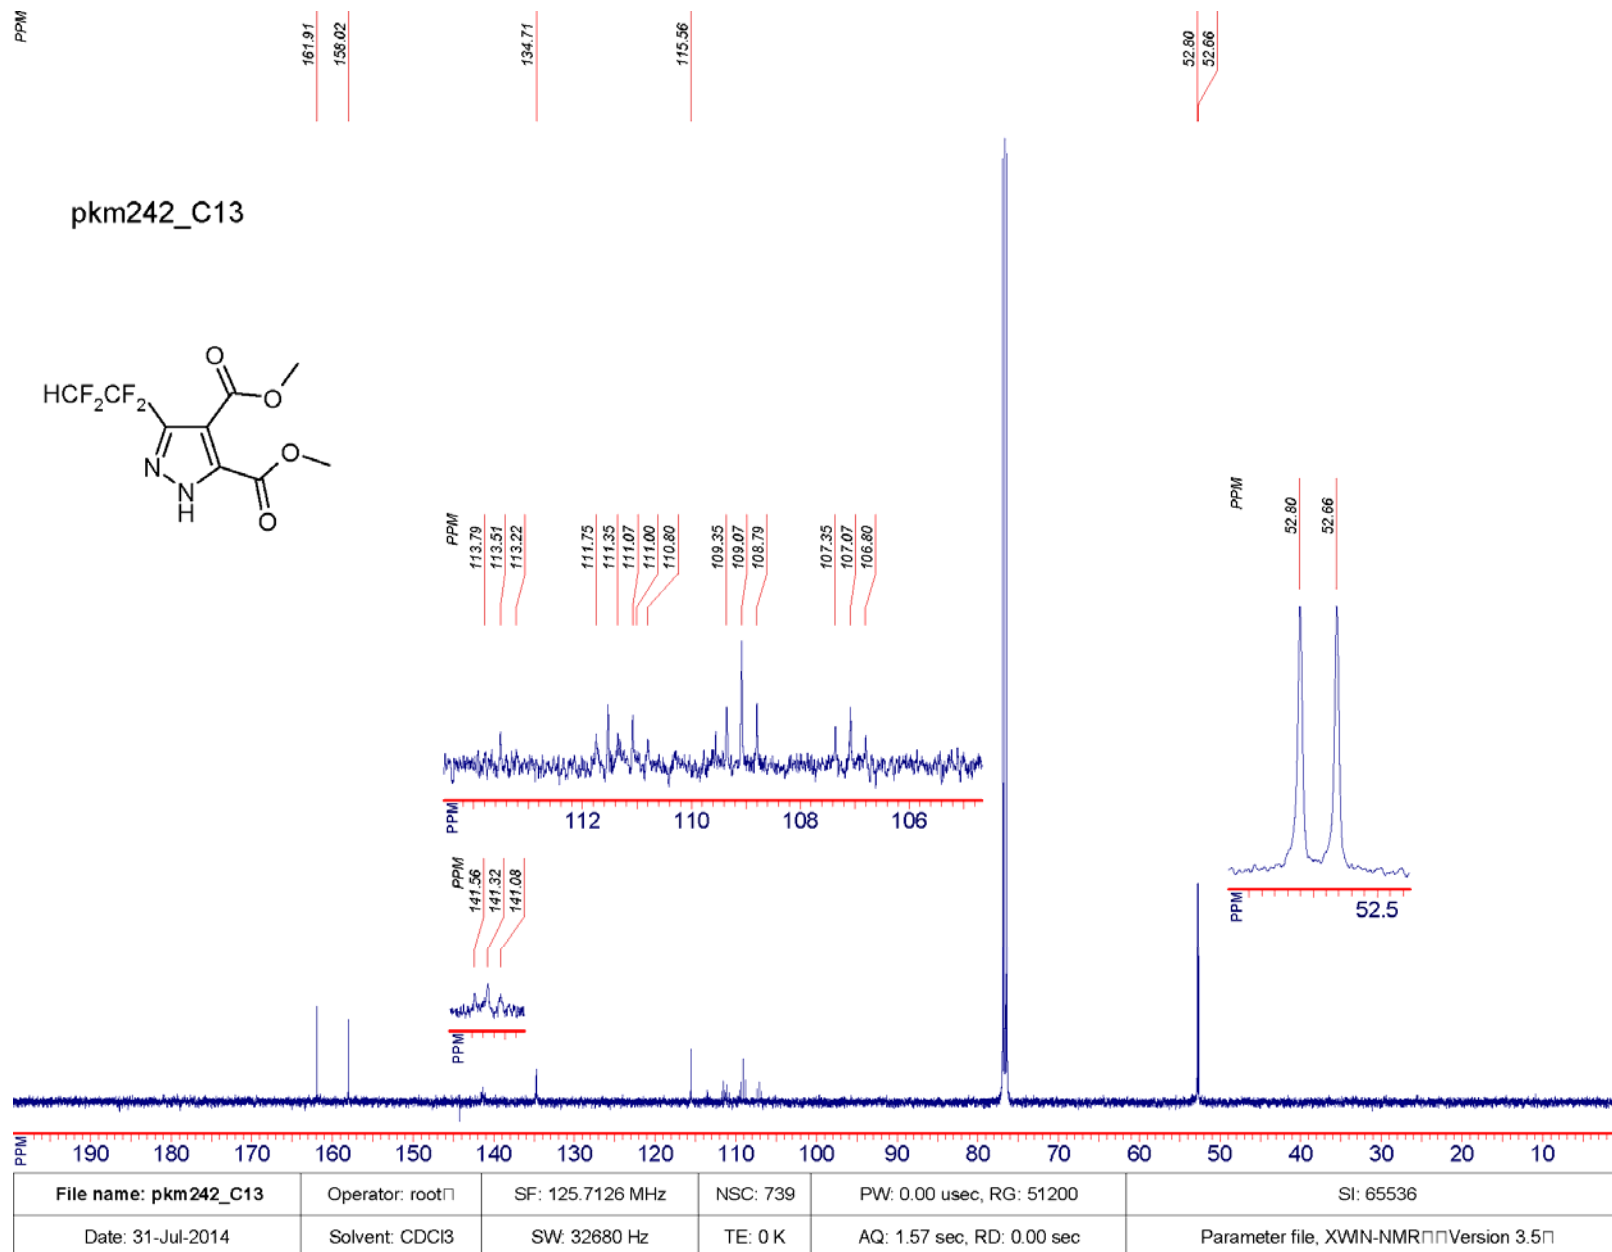

pkm242\_F19.fid

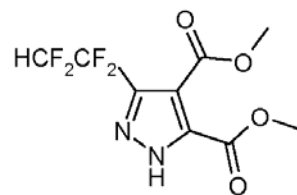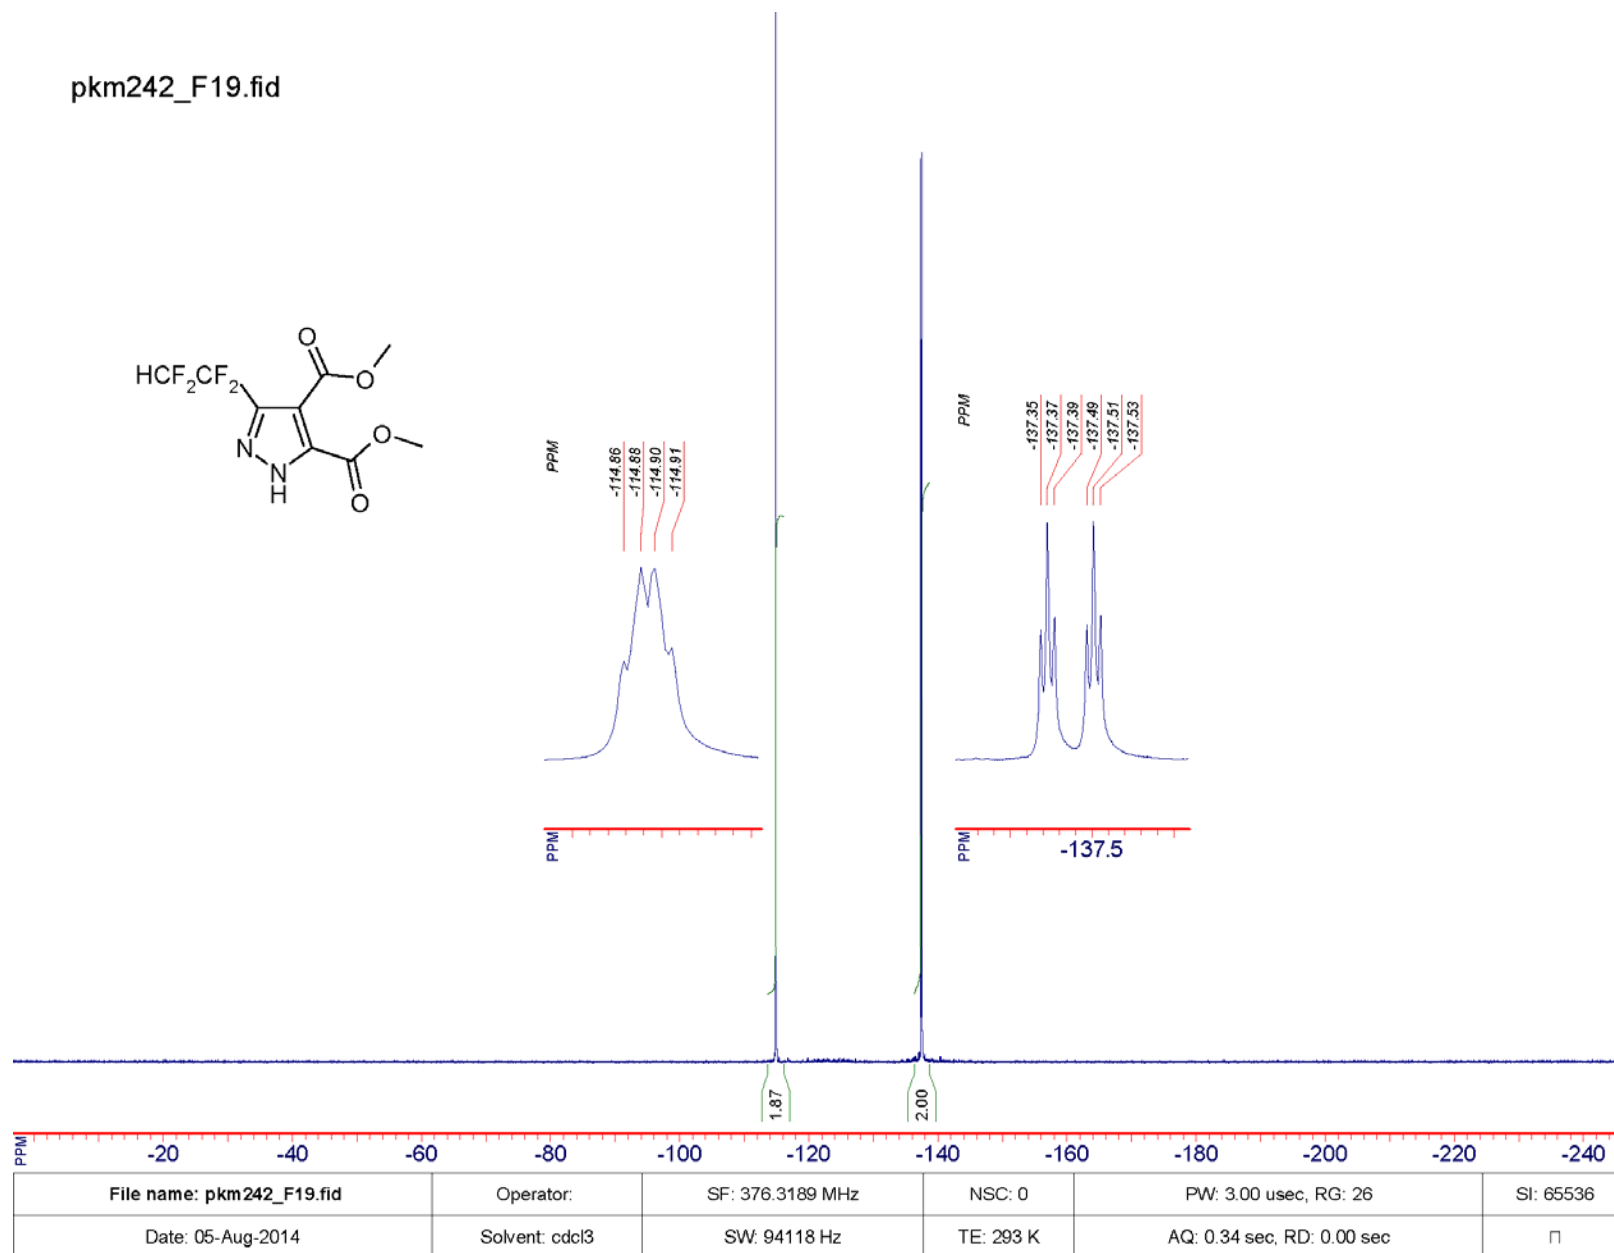

# Compound 18a

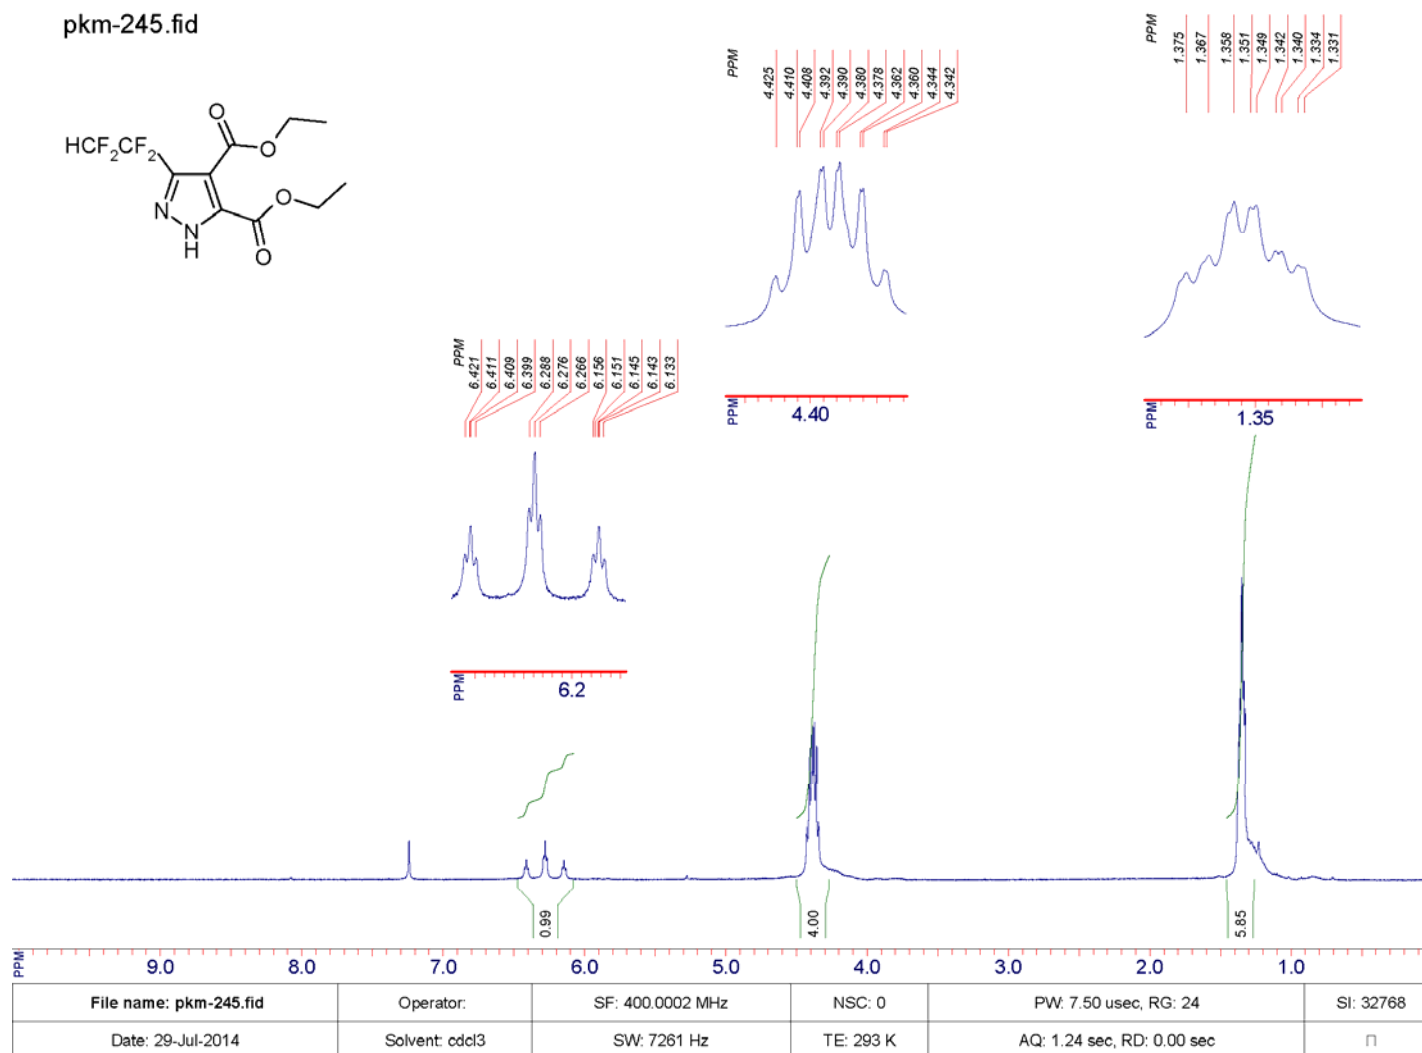

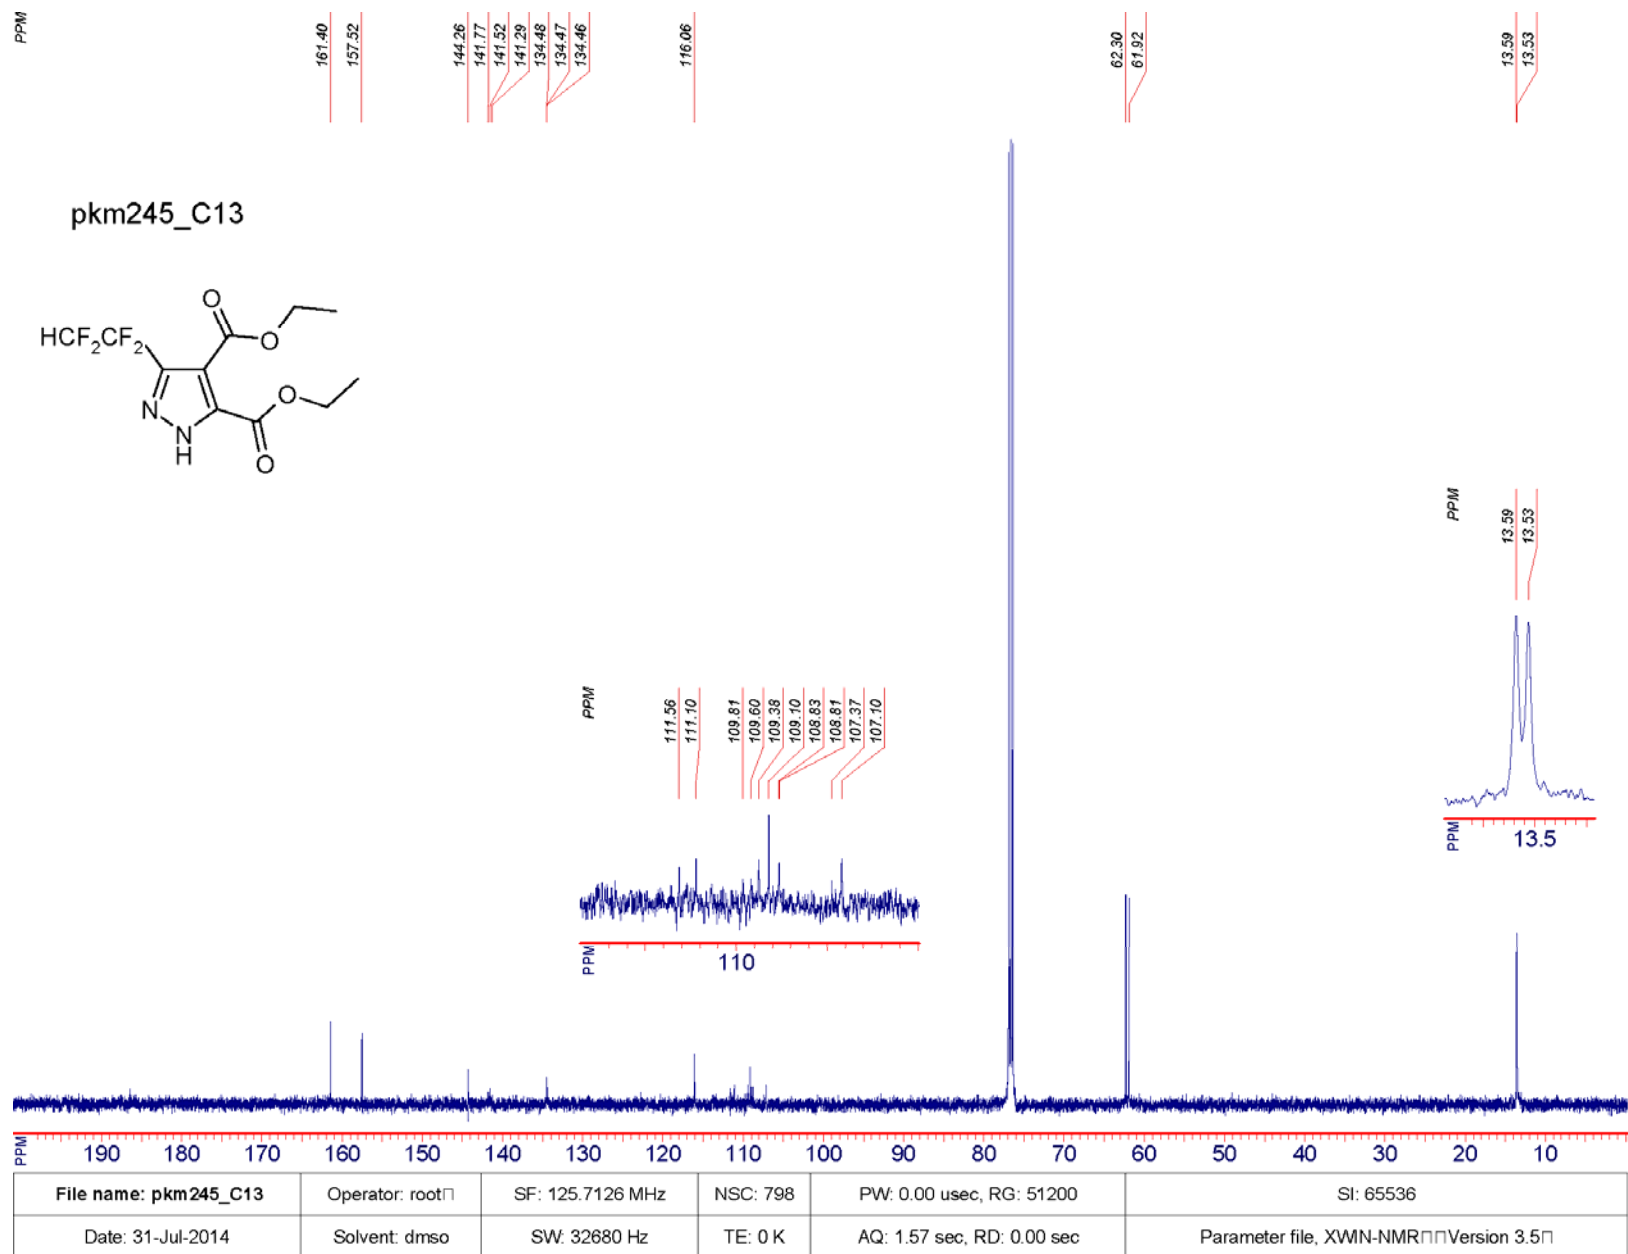

pkm245\_F19.fid

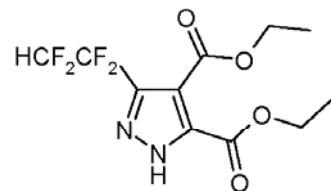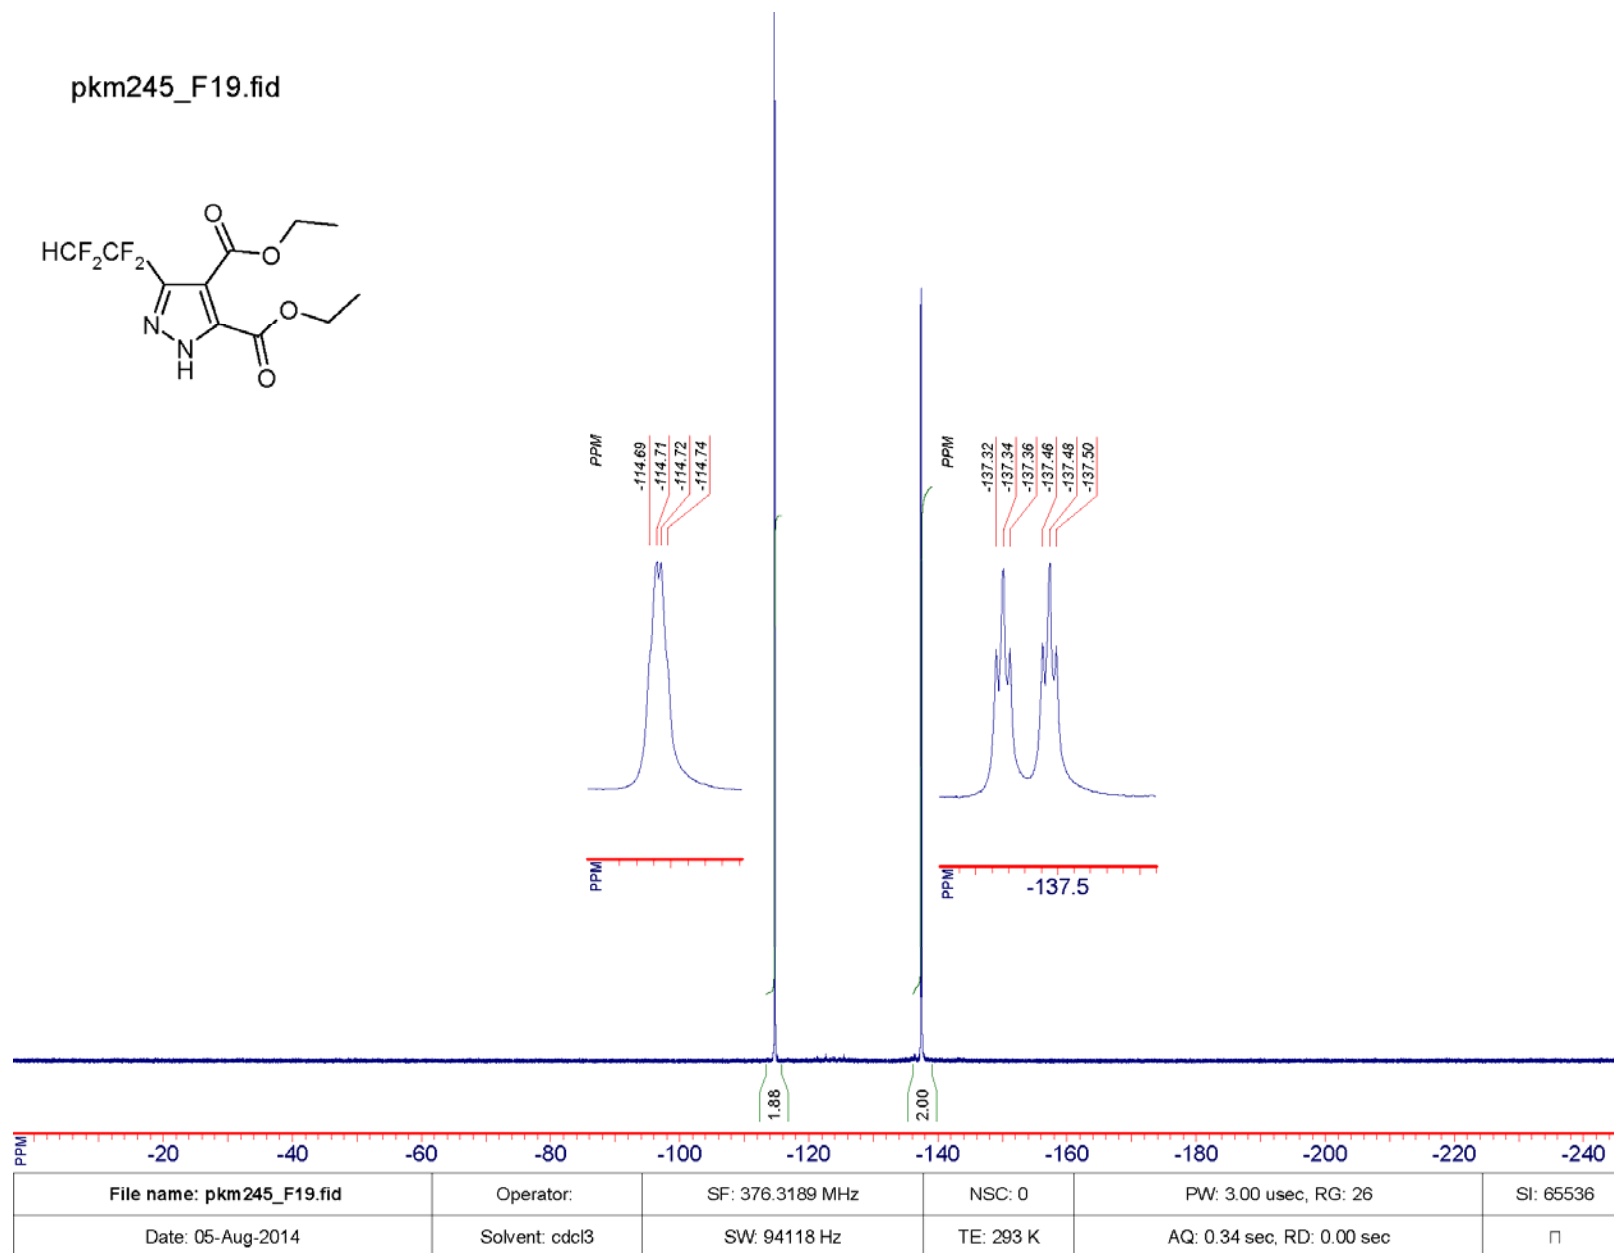

# Compound 19a

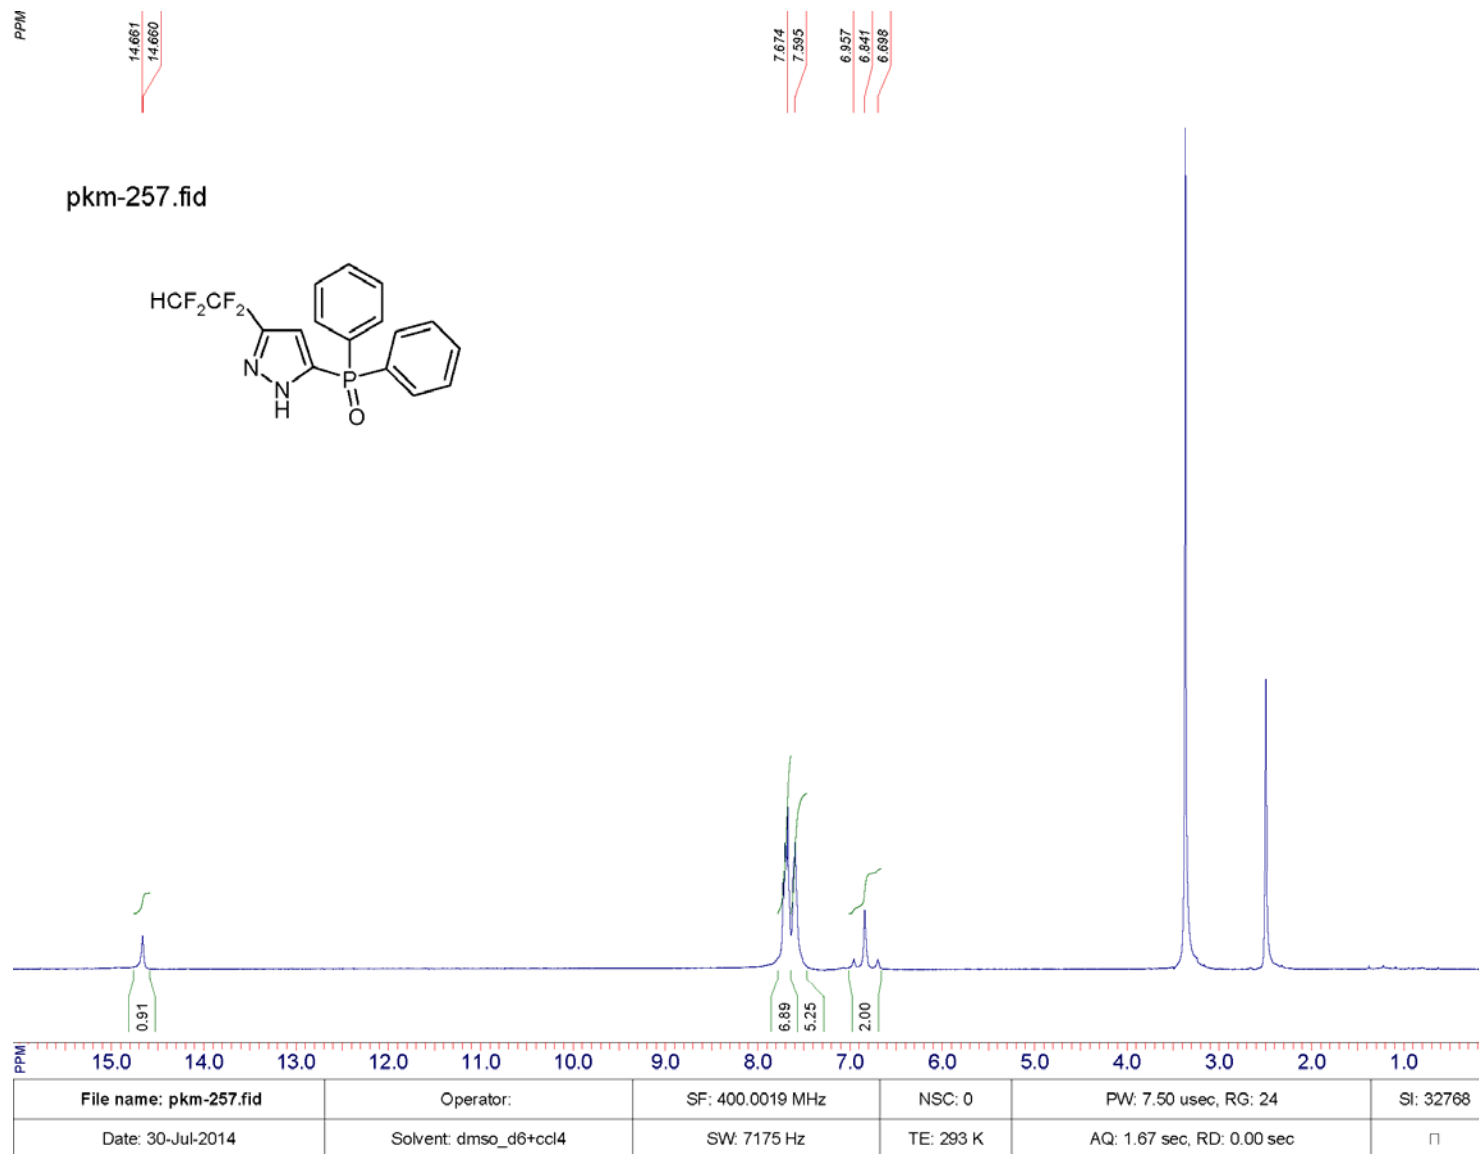



PPM

138.04  
138.02  
137.15  
137.14  
137.13  
137.12  
131.94  
131.22  
131.14  
129.19  
129.09  
111.80  
111.79  
111.67

pkm257\_C13

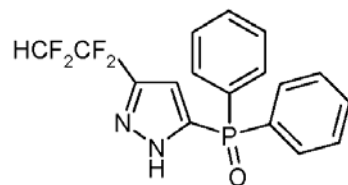

PPM  
111.80  
111.79  
111.67

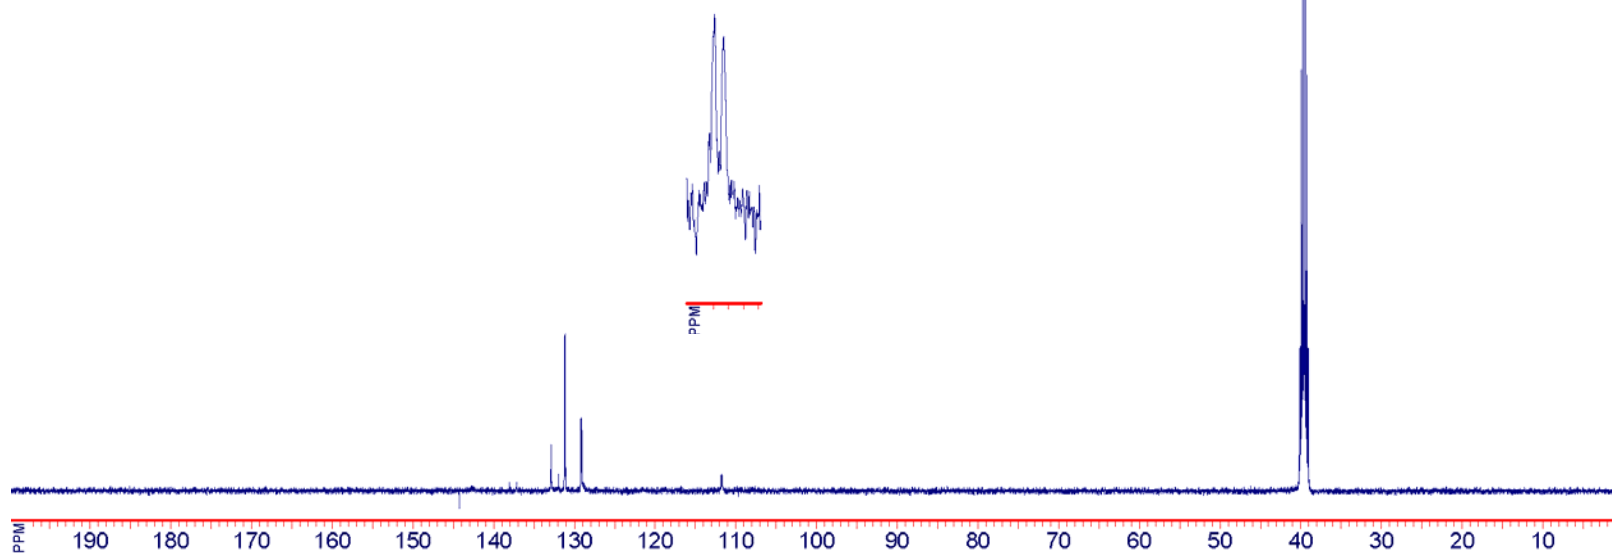

|                       |                |                  |          |                            |                                      |
|-----------------------|----------------|------------------|----------|----------------------------|--------------------------------------|
| File name: pkm257_C13 | Operator: root | SF: 125.7126 MHz | NSC: 660 | PW: 0.00 usec, RG: 51200   | SI: 65536                            |
| Date: 31-Jul-2014     | Solvent: dms0  | SW: 32680 Hz     | TE: 0 K  | AQ: 1.57 sec, RD: 0.00 sec | Parameter file, XWIN-NMR Version 3.5 |

pkm257\_F19.fid

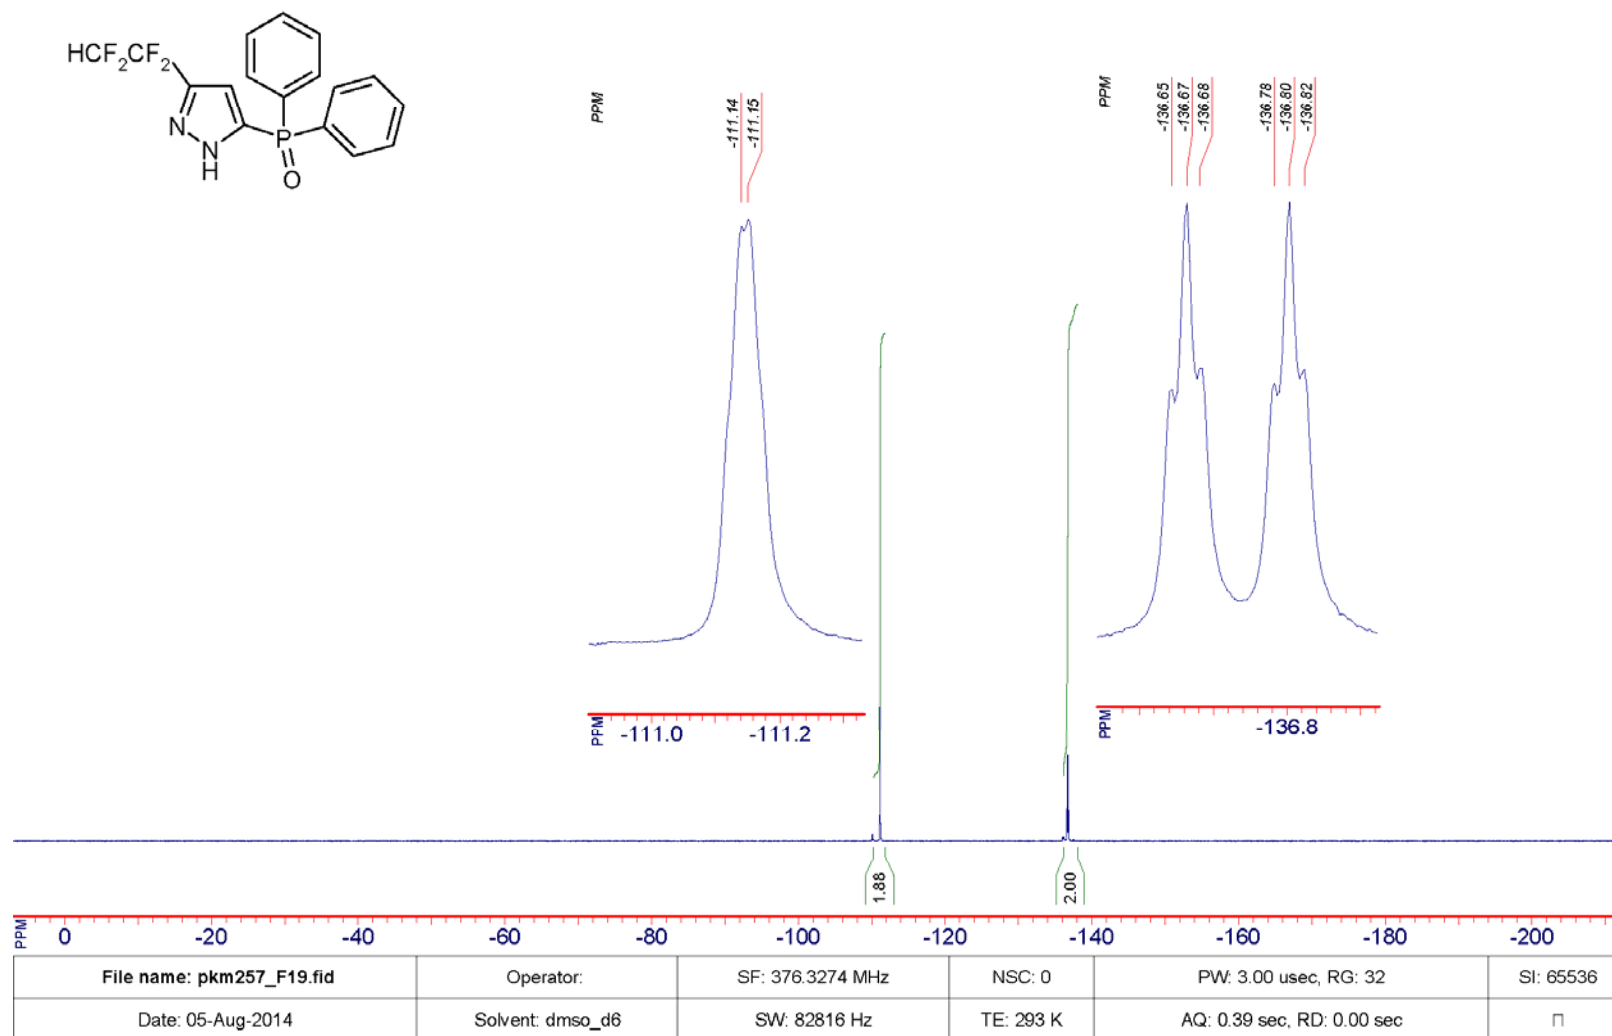

PPM

14.68

pkm257\_P31

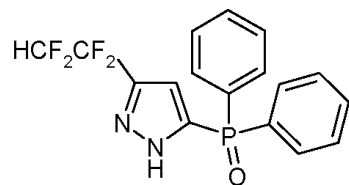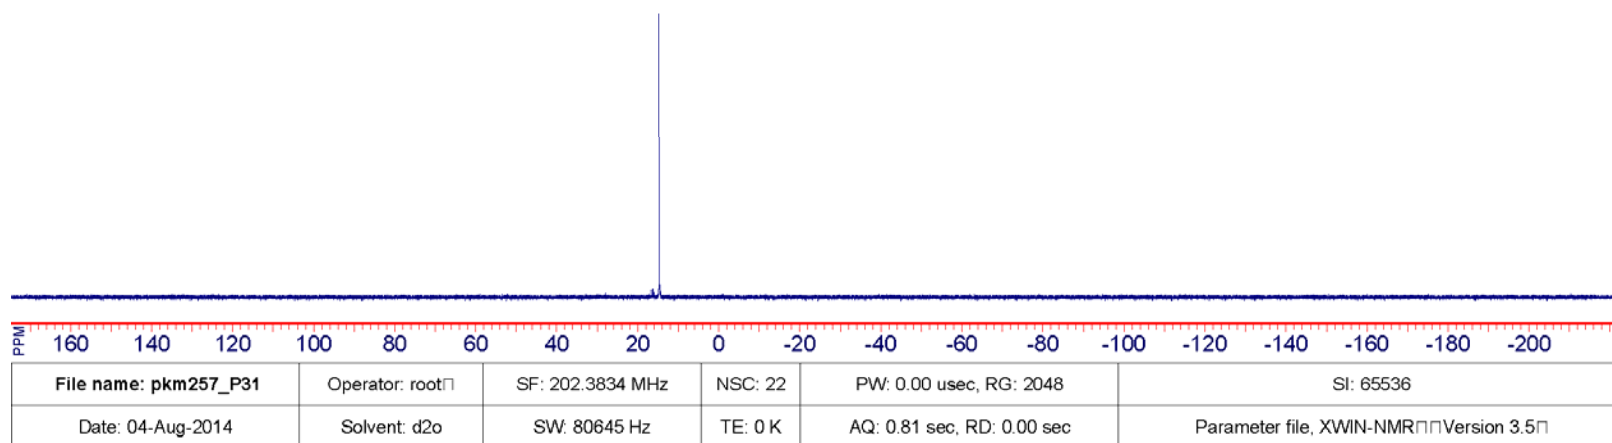

# Compound 20a

pkm260

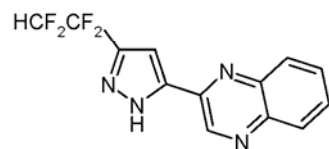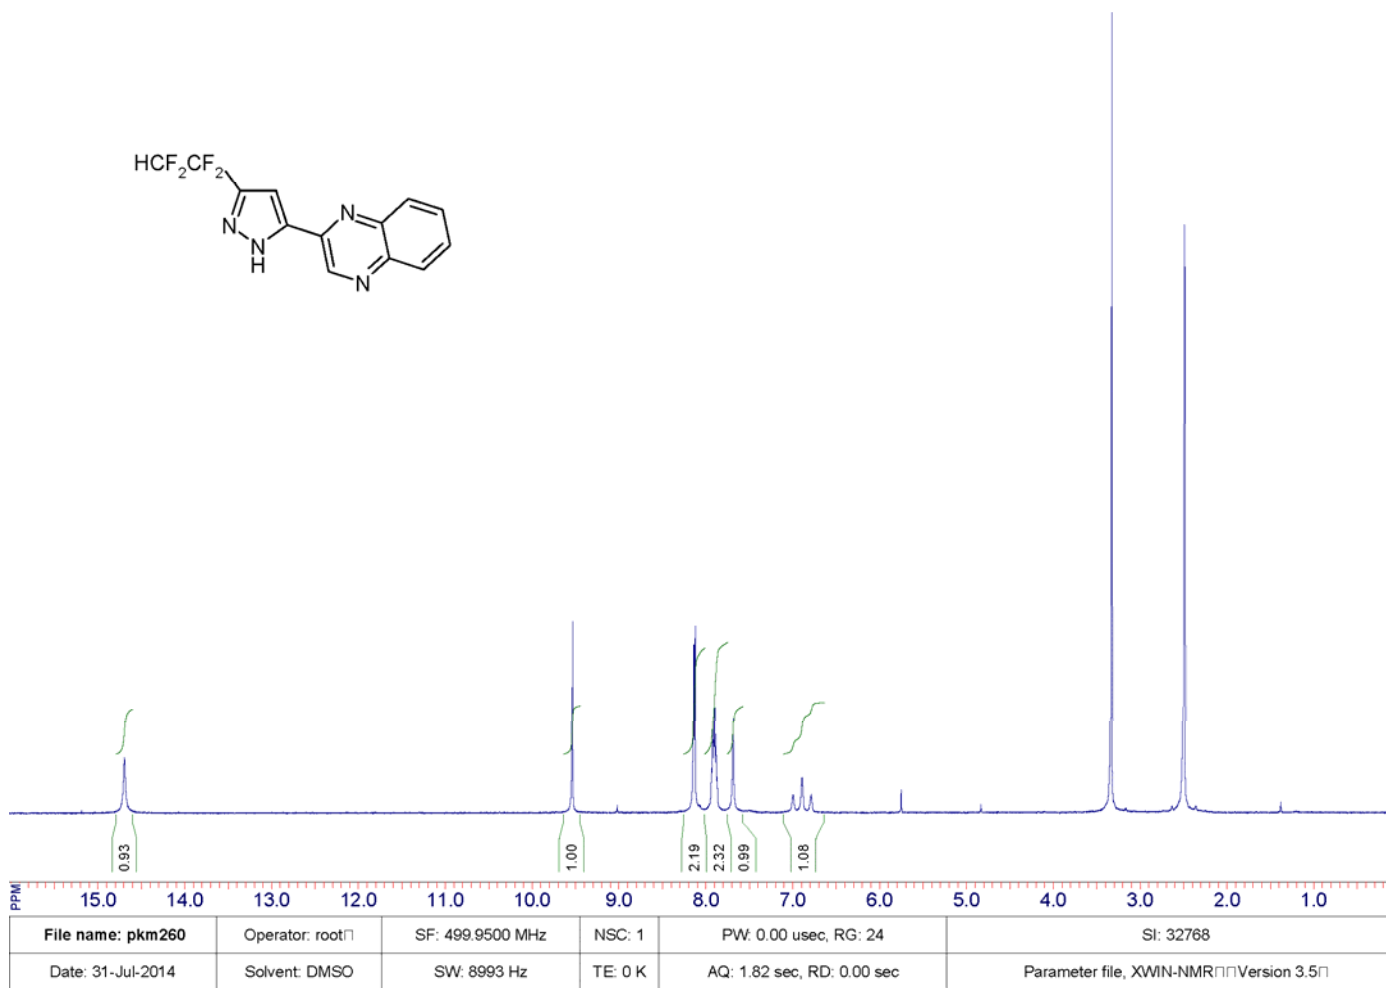

pkm260\_C13

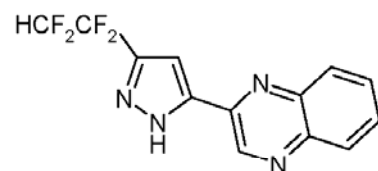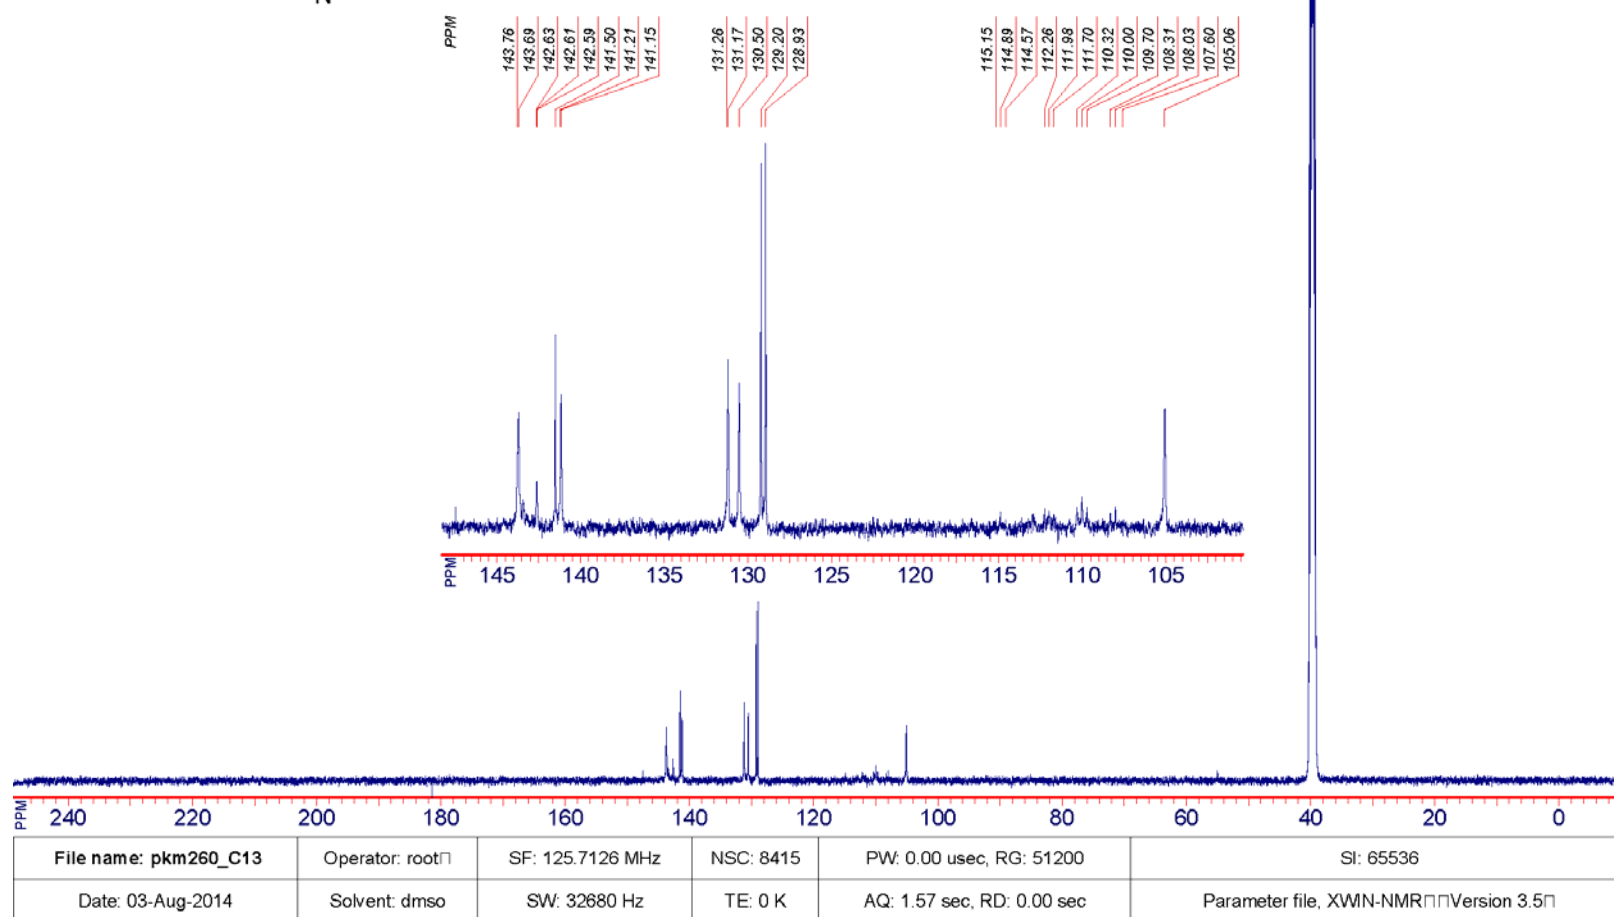

pkm260\_F19.fid

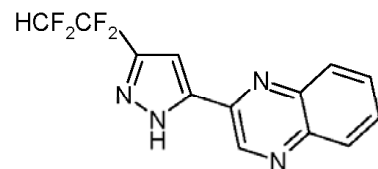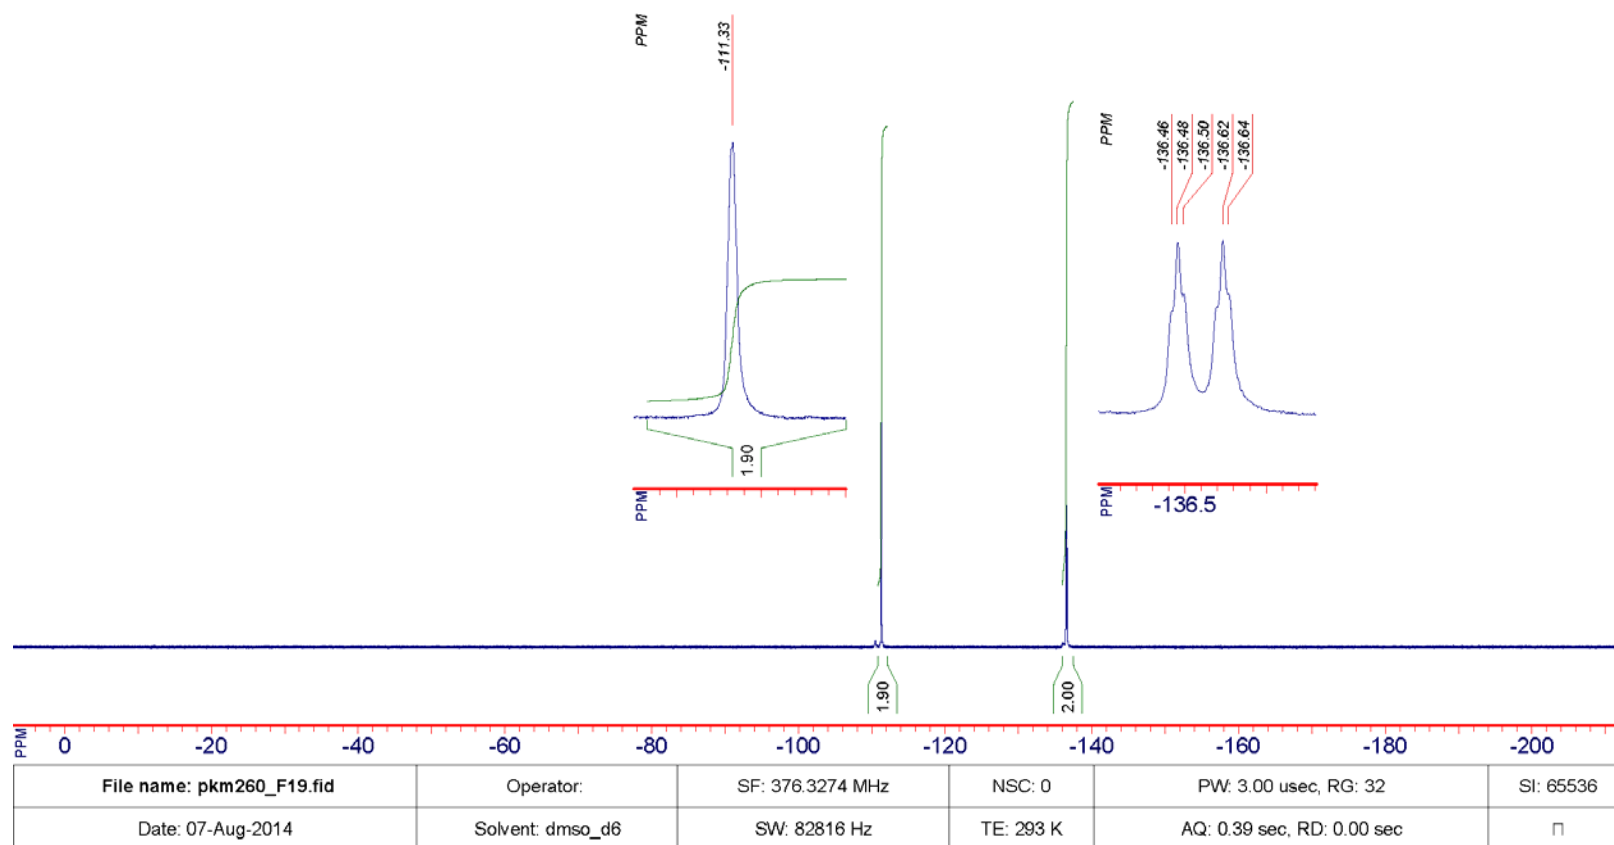

Supplement: c4ob02670e1.pdf [file c4ob02670e1.pdf]
